# Supplementary material for: Phosphine-promoted Thiol-Specific Bioconjugation with Allylic Acetates
Source: Research Square preprint supplement (doi:10.21203/rs.3.rs-6196140/v1), 2025-03-24
Supplement: Supplementary file 1 [file 16e7a0eb69819d421d551b1d.docx]

**Supplementary Information**

**Phosphine-promoted Thiol-Specific Bioconjugation with Allylic Acetates**

Xiaohong Li,1§ Xu Tao,1§ Zhenguo Zhang,§2,3 Bowen Li,1 Jiafeng Fan,1 Ruiping Han,1 Peizhong Xie,*1 and Teck-Peng Loh*1,2,3

1. School of Chemistry and Molecular Engineering, Nanjing Tech University, Nanjing 211816, China.
2. College of Advanced Interdisciplinary Science and Technology, Henan University of Technology, Zhengzhou, 450001, China.
3. Division of Chemistry and Biological Chemistry, School of Physical and Mathematical Sciences, Nanyang Technological University, Singapore 637371.

(§These authors contributed equally to this paper.)

E-mail: peizhongxie@njtech.edu.cn; [teckpeng@ntu.edu.sg](mailto:teckpeng@ntu.edu.sg)

**Contents**

[1. General Information S2](#_Toc182946240)

[2. General Procedure S3](#_Toc182946241)

[3. Chemo-Selectivity and Stability of the Cysteine Conjugation S7](#_Toc182946242)

[4. Kinetic Studies S10](#_Toc182946243)

[5. Heterogeneous Phosphine Catalyst S13](#_Toc182946244)

[6. Peptide and Protein Modification S18](#_Toc182946245)

[7. Analytical Data for All New Compound S36](#_Toc182946246)

[8. References S75](#_Toc182946247)

[9. NMR Spectra for New Compounds S77](#_Toc182946248)

# General Information

Unless otherwise noted, all commercially available compounds were used as received. All solvents were purified according to standard procedures. NMR spectra were recorded on a JEOL ECS-400S. The 1H NMR and spectra was recorded at 400 MHz, 13C NMR was recorded at 101 MHz, 19F NMR and spectra were recorded at 376 MHz. 1H and 13C NMR Chemical shifts were calibrated to tetramethylsilane as an external reference. Data are reported in the following order: chemical shift (δ) in ppm; multiplicities are indicated s (singlet), d (doublet), t (triplet), dd (doublet of doublets), m (multiplet); coupling constants (*J*) are in Hertz (Hz). IR spectra were recorded on a Thermo Scientific Nicolet iS-5 FT-IR spectrometer and are reported in terms of frequency of absorption (cm-1). HRMS were obtained on an IonSpec FT-ICR mass spectrometer with ESI resource (analyzer type: TOF). Fluorescence measurements were performed at room temperature on a Lengguang Technology (Shanghai) F97XP fluorescence spectrophotometer. Melting points were measured on a RY-I apparatus and are reported uncorrected. The X-ray photoelectron spectroscopy (XPS) instrument model is Thermo Scientific K-Alpha from the United States. The model of SEM scanning electron microscope is QuanTa Feg 250 from FEI Corporation in the United States. The model of the UV visible spectrophotometer is Persee TU-1900. From Beijing Puxi General Instrument Co., Ltd. The starting materials were readily prepared according to the related literatures. The triphenylphosphine (PPh3) were purchased from *Energy Chemical* (Shanghai). Statistical calculation of experimental data was analyzed using the one-way analysis of variance with a Tukey post-hoc test (more than three independent groups) or a two-tailed Student’s t-test (two independent groups) after normality and equal variance tests. For all tests, *p* values less than 0.05 were considered statistically significant. All statistical calculations and data processing were completed using SPSS Statistics and Origin.

# General Procedure

- 1. **Preparation of MBHAs.**

The **MBHAs (1a-1z, 1aa)** was prepared according to the related literature1,2. **54**, **55**, **64**, and **66** require a one-step acylation reaction before forming MBHAs precursors3, which are then obtained using conventional methods for MBHAs. **64** is obtained by first reacting *Dansyl chloride* with 4-hydroxybenzaldehyde to form an aldehyde4, and then using the conventional synthesis method of MBHAs. Specifically, the precursor of MBHAs **66** was obtained through a one-step substitution reaction of hydroxymethyl coumarin (coumarin-4) and 2-bromoethanol, followed by a one-step acylation reaction5.

- 1. **Preparation of peptides (2n-2q).**

Following a slightly modified procedure6, to a 25 mL round-bottom flask, **S1** (1.1 mmol, 2.2 equiv.) and DMF (6 mL) were added. The flask was cooled in an ice bath, and then 1-hydroxybenzotriazole hydrate (HOBt) (1.1 mmol, 2.2 equiv.) was added. The mixture was stirred at 0 °C until all HOBt dissolved. 1-(3-Dimethylaminopropyl)-3-ethylcarbodiimide hydrochloride (EDC∙HCl) (1.1 mmol, 2.2 equiv.) was added. The mixture was stirred at 0 °C for 5 min before adding **S2** (0.50 mmol, 1.0 equiv.) and *N*-methylmorpholine (NMM) (2.2 mmol, 2.2 equiv.). The resulting reaction mixture was stirred at 0 °C for 90 min plus room temperature 16 h. EtOAc (20 mL) was added and the mixture was washed with water (25 mL× 4). The organic layer was dried over anhydrous Na2SO4 and concentrated in vacuo. Flash chromatography on silica gel (EtOAc/PE) afforded **S3**.

To a solution of **S3** (1.0 equiv.) in MeOH (18 mL) and NaOAc/AcOH (pH = 4.9) buffer (9 mL) was added triphenylphosphine (1.2 equiv.). The reaction mixture was stirred at 60 oC for 2 h. Then, it was cooled to room temperature and extracted with EtOAc (20 mL×4). The organic layer was dried over anhydrous Na2SO4, concentrated, and purified by flash column chromatography on silica gel (EtOAc/ PE) to provide peptides **S4 (2n-2q)**.

**2.3 Optimization of the Reaction Conditions.*a***


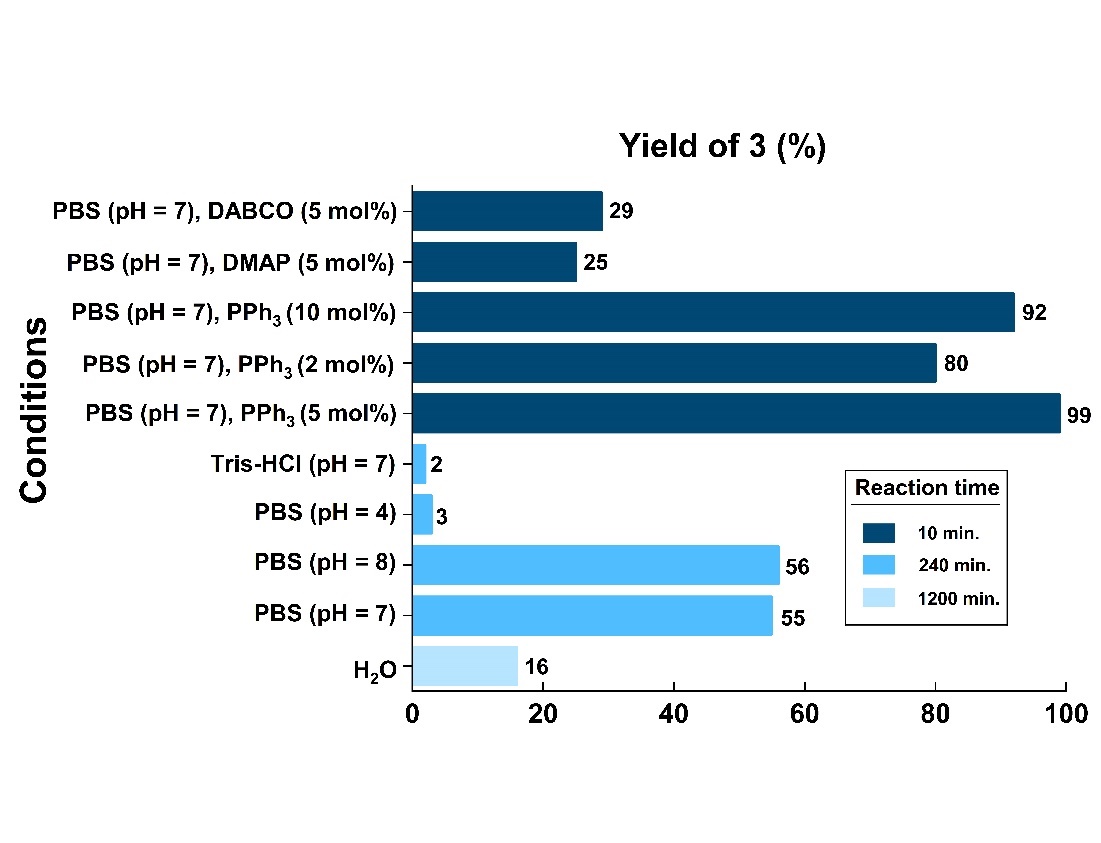


**Figure S1.** The effect of solvent and catalysts on this reaction.

*a* Experimental conditions: **1a** (0.24 mmol), **2a** (0.2 mmol), and PPh3 (0.01 mmol) were stirred in solvent (2.0 mL) at 30 oC (metal bath). The yield of **3** was determined by 1H NMR of the crude product with Mesitylene as the internal standard.

- 1. **General procedure for preparation of 3-67.**

**Thiols** (0.2 mmol), catalyst PPh3 (5 mol%) or POL-PPh3 (5 mol%) was dissolved in 2.0 mL PBS (pH = 7), then **MBHAs** (0.24 mmol) was added and stirred at room temperature. After complete conversion, the biphasic mixture was extracted with ethyl acetate (2 mL× 3), and the combined organic layers were dried over anhydrous Na2SO4. After filtering and evaporation, the residue was purified by preparative thin-layer chromatography (PTLC) to afford the corresponding products **3-67** (for the details, see each compounds).

- 1. **Gram-scale synthesis of 3.**

**The Procedure for gram-scale synthesis of conjugate 3 by selecting PPh3 catalyst:**To a well-dried round bottom flask (50 mL) equipped with a magnetic stir bar, 20 mL of pH = 7 phosphate buffer solution was added to the mixture of **2a** (6.0 mmol, 1.0 equiv.), **1a** (7.2 mmol, 1.2 equiv.) and PPh3 (5 mol%). After stirring for 10 min at room temperature, the reaction was extracted with ethyl acetate (10 mL× 3). Then, the organic phases were collected and concentrated under reduced pressure. The residue was purified by silica flash column chromatography (silica gel, petroleum ether/ethyl acetate = 1/1) to obtain the pure product **3** (2.1 g, 96%) as a light-yellow oil.

**The Procedure for gram-scale synthesis of conjugate 3 by selecting POL-PPh3 catalyst:**To a well-dried round bottom flask (50 mL) equipped with a magnetic stir bar, 15 mL of pH = 7 phosphate buffer solution was added to the mixture of **2a** (4.0 mmol, 1.0 equiv.), **1a** (4.8 mmol, 1.2 equiv.) and POL-PPh3 (5 mol%). After stirring for 45 min at room temperature, the reaction was extracted with ethyl acetate (10 mL× 3). Then, the organic phases were collected and concentrated under reduced pressure. The residue was purified by silica flash column chromatography (silica gel, petroleum ether/ethyl acetate = 1/1) to obtain the pure product **3** (1.3 g, 90%) as a light-yellow oil.

# Chemo-Selectivity and Stability of the Cysteine Conjugates.

- 1. **Investigation of chemo-selectivity.**

**Figure S2. Chemo-selectivity of 2a towards various nucleophiles**: Statistical significance between the two groups was calculated *via* a Tukey post-hoc test: ns, *p* > 0.05. The mean values and SD are presented (n = 3 independent times).

*The general procedure of the reaction is shown in Figure S2*: To a 10-mL reaction tube, 2 mL of pH = 7 Phosphate buffer solution was added to the mixture of **2a** (28.7 mg, 0.15 mmol, 1.5 equiv.) and **1a** (23.4 mg, 0.1 mmol) respectively. Afterward, the corresponding nucleophilic amino acid (0.15 mmol, 1.5 equiv.) was added. After stirring for 10 min at room temperature, the reaction was quenched and extracted with ethyl acetate. Then, the organic phases were collected and concentrated under reduced pressure. The crude 1H-NMR was analyzed to determine the yields of **3** using Mesitylene as the internal standard.

- 1. **Stability of 3 in the present of endogenous molecules.**

**Figure S3**. **Stability of 3 in the presence of endogenous molecules:** 1) Lysine; 2) Serine; 3) Histidine; 4) Proline; 5) Tyrosine; 6) Tryptophan; 7) Cysteine; 8) GSH, Glutathione; 9) DA, Dopamine; 10) 5-HTP, 5-Hydroxytryptophan. Statistical significance between the two groups was calculated *via* a Tukey post-hoc test: ns, *p* > 0.05. The mean values and SD are presented (n = 3 independent times).

*The general procedure of the reaction shown in Figure S3*: In a 10 mL reaction tube, 2 mL of pH = 7 Phosphate buffer solution was added to the mixture of **3** (36.5 mg, 0.1 mmol, 1.0 equiv.) and different endogenous molecules (0.1 mmol, 1.0 equiv.). After stirring for 24 hours at room temperature, the reaction was quenched and extracted with ethyl acetate. Then, the organic phases were collected and concentrated under reduced pressure. The crude 1H-NMR was analyzed to determine the yields of **3** using Mesitylene as the internal standard.

- 1. **Stability of 3 in diverse solutions.**

**Figure S4. Stability of 3 under various conditions**: Statistical significance between the two groups was calculated *via* a Tukey posthoc test, ns means no significance, *p*> 0.05. The mean values and SD are presented (n = 3 independent times).

*The general procedure of the reaction shown in Figure S4*:To 10 mL reaction tube, 2 mL of depicted solution was added and mixed with **3** (36.5 mg, 0.1 mmol, 1.0 equiv.). After stirring for 24 hours at room temperature, the reaction was quenched and extracted with ethyl acetate. Then, the organic phases were collected and concentrated under reduced pressure. The crude 1H-NMR was analyzed to determine the yields of **3** using Mesitylene as the internal standard.

# Kinetic Studies

**Typical procedures for reaction kinetics determined by UV-Vis spectroscopy.**

A concentrated stock solution (10 mM) of **2a** and PPh3 (5 mol%) was prepared in acetonitrile, a concentrated stock solution (20 mM) of **1a** was prepared in acetonitrile, and a concentrated stock solution (10 mM) of **3** was prepared in acetonitrile. All three solutions were stored in refrigerated packaging. For all experiments using PBS buffer system, the buffer was 100 mM PBS at pH = 7, as indicated.

Prepare a concentrated stock solution of **3** in acetonitrile (10 mM) and store it as a refrigerated aliquot at low temperature. Add 10 mM of **3** stock solutions (4 µL, 8 µL, 12 µL, 16 µL, 20 µL) into a colorimetric dish containing 1.8 mL of PBS pH = 7 buffer, and then add acetonitrile (196 µL, 192 µL, 188 µL, 184 µL, 180 µL) separately, and mix by pipetting multiple times. At this time, the concentrations of five different solutions are (20 µM, 40 µM, 60 µM, 80 µM, 100 µM), the PBS/acetonitrile ratio is 9/1, and the final volume of the solution is 2000 µL. The test is conducted at room temperature. The absorbance was monitored at 250 nm, corresponding to the concentration of the aromatization product. Each parallel concentration group was reconfigured three times and the absorbance of **3** was tested at the same concentration three times, as shown in the figure. Linear parallel fitting was performed using Origin for the three parallel groups. Obtain a linear relationship between the concentration of **3** and absorbance.

For the reaction of **1a** with **2a**: 20 µL of stock solution containing 10 mM **2a** and **PPh3** (5 mol%) was added into a colorimetric dish containing 1.8 mL of PBS (pH = 7) buffer solution. 10 µL of stock solution (20 mM) of **1a** was added into the colorimetric dish, which was followed by adding 170 µL of acetonitrile and mix multiple times with a pipette. At this point, the ratio of PBS/acetonitrile is 9/1, and the final volume of the solution is 2.0 mL. The concentrations of **1a** and **2a** are both 100 µM, and the reaction is carried out at room temperature. The reaction progress is monitored at 250 nm, corresponding to the formation of arylation products. Measure the absorbance of the reaction solution every 10 seconds until the reaction is complete. Since the reaction between **1a** and **2a** is not a simple second-order reaction, it may involve the activation of **1a** by a phosphine catalyst, which accelerates the overall reaction rate. If we consider the overall reaction as a second-order reaction, the half-life of the reaction can be obtained by fitting the absorbance changes of the curve. The reaction rate constant (*k*2) is calculated based on the second-order kinetic mechanism where the starting material concentration is equal.

**Figure S5**. (A) The linear relationship between **3** and absorbance under different concentration conditions. The absorbance is tracked by monitoring different concentrations of arylation products at 250 nm. (B) Progress of reaction of **1a** with equimolar **2a** Reaction progress was monitored by following the formation of the arylation product at 250 nm. (C) Absorption spectra of **1a** (200 µM, blue) and **3** (200 µM, red). Supplementary explanation: The conditions for each test were strictly consistent, and the experiment was conducted at room temperature. The solvents were composed of PBS and acetonitrile = 9/1, with a total reaction volume of 2 mL. **2a** and **PPh3** (5 mol%) were prepared in the same concentrated stock solution. (A) shows the data from three identical concentration gradient tests fitted together by Origin. Monitor reaction progress through (B) based on (A). Error bars = SD, n = 3 independent experiments.

# Heterogeneous Phosphine Catalyst

**Synthesis of POL-PPh3**.

POL-PPh3 was synthesized by polymerization of tris (4-vinylphenyl) phosphine under solvothermal conditions. As a typical experimental procedure, 2.0 g of tris (4-vinylphenyl) phosphine was dissolved in 20 mL of tetrahydrofuran (THF), followed by 50 mg of azodiisobutyronitrile (AIBN). The mixture was transferred to an autoclave, quickly pumped for three times, then heated to 100 °C, and reacted for 24 hours. After evaporating THF in a vacuum, washing with ethyl acetate, and vacuum drying, the solid monomer of the title material was obtained. Tris (4-vinylphenyl) phosphine was prepared by dropwise adding a solution of n-butyl lithium in hexane (2.5 M, 12.6 mL, 31.5 mmol) to a solution of *p*-bromovinylbenzene (6.04 g, 33 mmol) in anhydrous tetrahydrofuran (40 mL) at -78 ℃ under argon atmosphere within 20 minutes. The solution was stirred for 1 hour and phosphorus trichloride (1.37 g, 10 mmol) dissolved in anhydrous tetrahydrofuran (5 mL) was added dropwise within 5 minutes. Continue to stir the mixture at -78 ℃ for 1 hour to restore the system to room temperature. Allow the reaction to overnight. The reaction was quenched with 2M HCl solution. The mixture was extracted three times with ethyl acetate and water. The combined organic phases were dried with anhydrous Na2SO4. Concentrate under reduced pressure. Using petroleum ether/EtOAc = (100/1) mixture as eluent, the residue was purified by silica gel rapid column chromatography to obtain tris (4-vinylphenyl) phosphine as a white solid. The reference data is consistent with the literature7.

The synthetic methods of NCPS-PPh3, EOF-17, and POPs-3, m=2 are consistent with the literature reports8,9,10. PDVB-PPh3 was purchased from Xinhengyan Co., ltd.

**Table S1. Yield of 3 and 21 under different heterogeneous phosphine catalyst conditions**

**General procedure of the reaction shown in Table S1**: To a 10 mL reaction tube equipped with a magnetic stir bar, 2 mL of pH = 7 Phosphate buffer solution was added to the mixture of **2a** (0.2 mmol, 1.0 equiv.), **1a** or **1s** (0.24 mmol, 1.2 equiv.) and phosphine catalyst(5 mol%). After stirring for 10 min or 45 min at room temperature, the reaction was quenched and extracted with ethyl acetate. Then, the organic phases were collected and concentrated under reduced pressure. The crude 1H-NMR was analyzed to determine the yields of **3** or **21** using Mesitylene as the internal standard.

After synthesizing these heterogeneous phosphine catalysts, we tried their effects on the model reaction, screened out the best catalyst ***POL-PPh3***, and made a simple material characterization. Then, to verify the reusability of ***POL-PPh3***, we carried out five recycling experiments on the model reaction and found that the catalytic effect of ***POL-PPh3*** did not decrease obviously after recycling. To understand the root of the problem more clearly, we characterized ***POL-PPh3*** after recycling five times by XPS spectrum and found that its oxidation degree was close to 50%, which showed its potential value in industrial applications. ***POL-PPh3*** which has undergone multiple cyclic experiments, may lose its catalytic activity due to oxidation and cannot be recycled again. Similar methods have been reported in the literature for reduction and reuse in catalytic cycling. This is not only environmentally friendly but also enhances the atomic economy. When ***POL-PPh3*** undergoes multiple cycling experiments, most of it may oxidize and lose its catalytic activity, making it unusable for recycling. Similar methods reported in literature11 can be used for reduction and then reused for catalytic recycling. This is not only environmentally friendly but also increases the atomic economy.


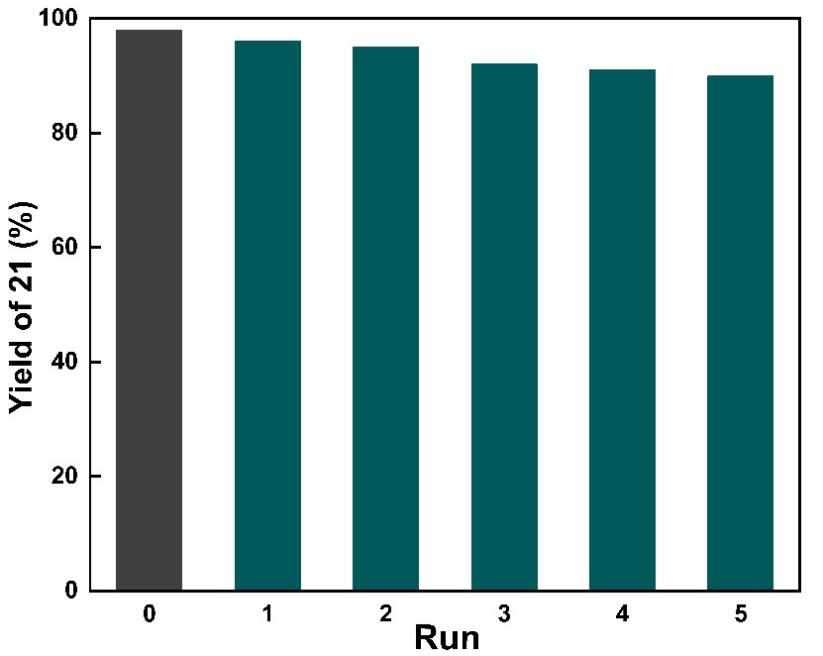


**Figure S6. Recycling studies of POL-PPh3**

**The general procedure of Recycling tests:** The recoverability of **POL-PPh3** was studied by using a model reaction (Figure S6) following the general procedure. To recover the catalyst **POL-PPh3** after the reaction, the catalyst was filtered through a sand-core Bush funnel (G4), and the excess water was removed with ethanol, washed with ethyl acetate, and dried in a vacuum, and then continued to be used in the next model reaction.


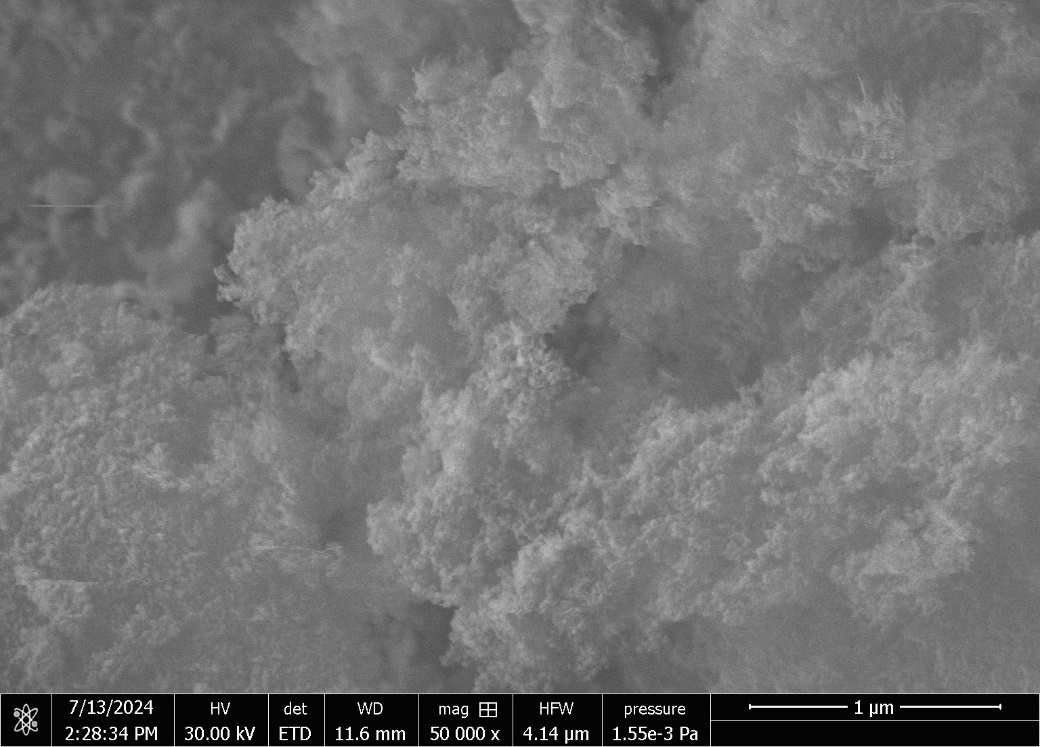


**Figure S7. SEM image of POL-PPh3**


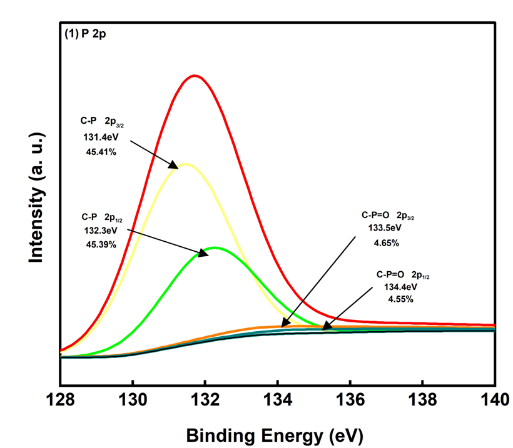


**Figure S8. XPS spectrum of POL-PPh3.**

The binding energies at 131.4 and 132.3 eV are attributable to the P(III) 2p3/2 and P(III) 2p1/2, while the binding energies at 133.5 and 134.4 eV are ascribed to the P(V) 2p3/2and P(V) 2p1/2, respectively.


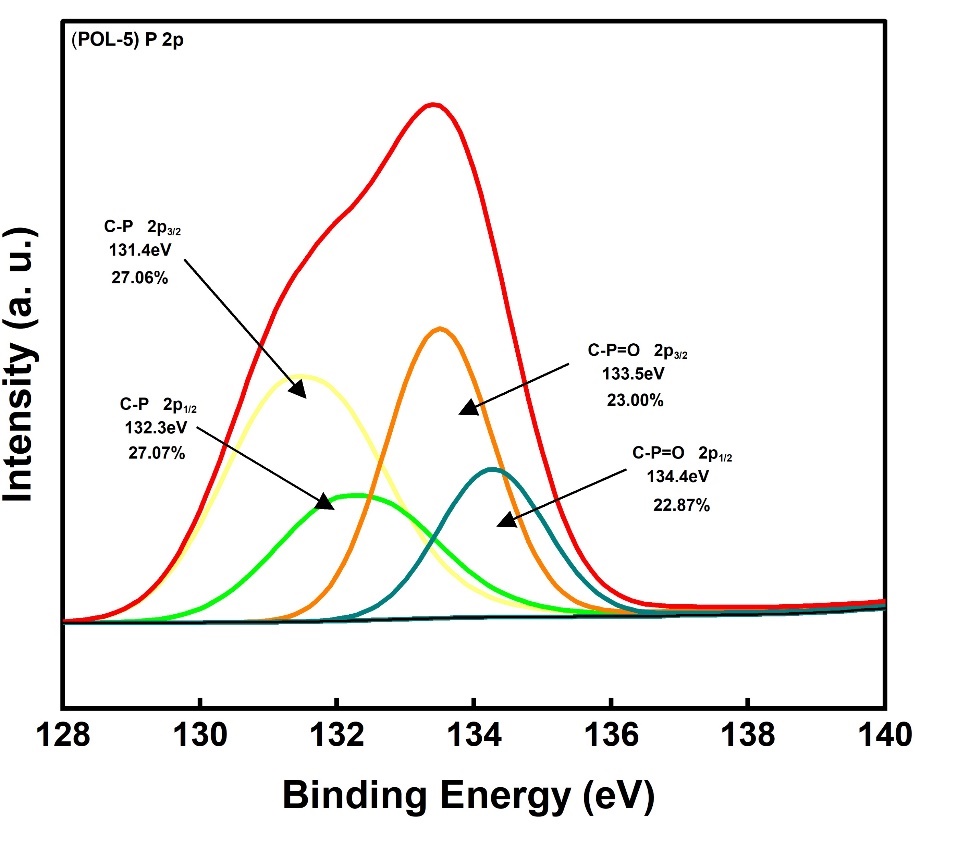


**Figure S9. XPS spectrum of POL-PPh3** **after five cycles.**

The binding energies at 131.4 and 132.3 eV are attributable to the P(III) 2p3/2 and P(III) 2p1/2, while the binding energies at 133.5 and 134.4 eV are ascribed to the P(V) 2p3/2and P(V) 2p1/2, respectively.

# Peptide and Protein Modification.

**General procedure for the modification of peptides Lanreotide with 54*:*** 5.0 equivalents of solid TCEP•HCl was added to 1 ml of a 2 mM solution of Lanreotide (2.2 mg, 2.0 μmol, 1.0 equiv.) in PBS (Phosphate-buffered saline) buffer, pH 6.0, containing 10% DMSO. The mixture was allowed to slowly stirring at 37 ℃ under air for 2 hours. Subsequently, the peptide solution (pH 6.0) was mixed with 100 μL solution of **54** (0.2 M in DMSO, 10.0 equiv.) and 5 μL solution of POL-PPh3(20 mM in DMSO, 0.05 equiv.). LC-MS was used to monitor the reaction. When the reaction was completed, the residue was purified by preparative HPLC to obtain the modified products, and the regio-selectivity was analyzed by LC-MS/MS.


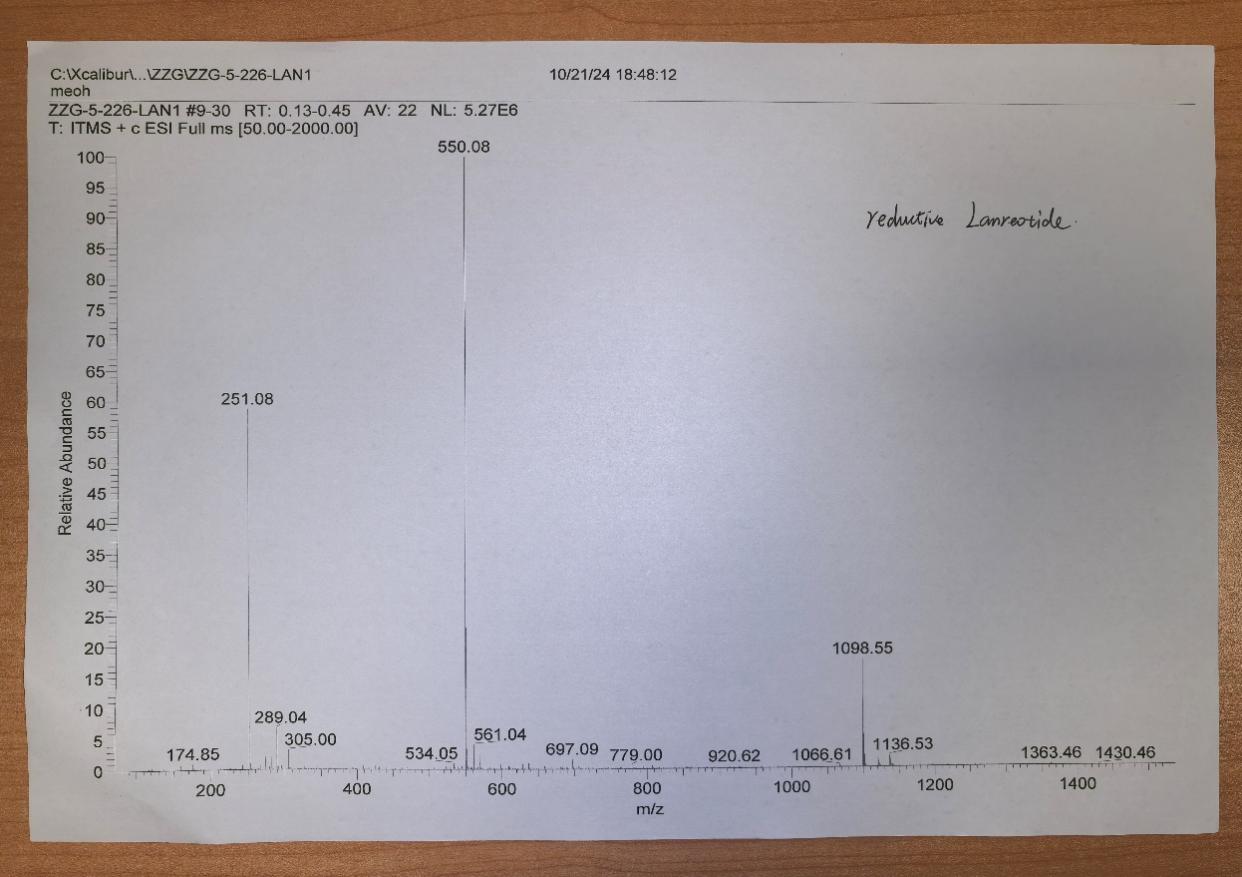


**Figure S10.** Showing LC/MS of the reductive peptide Lanreotide.


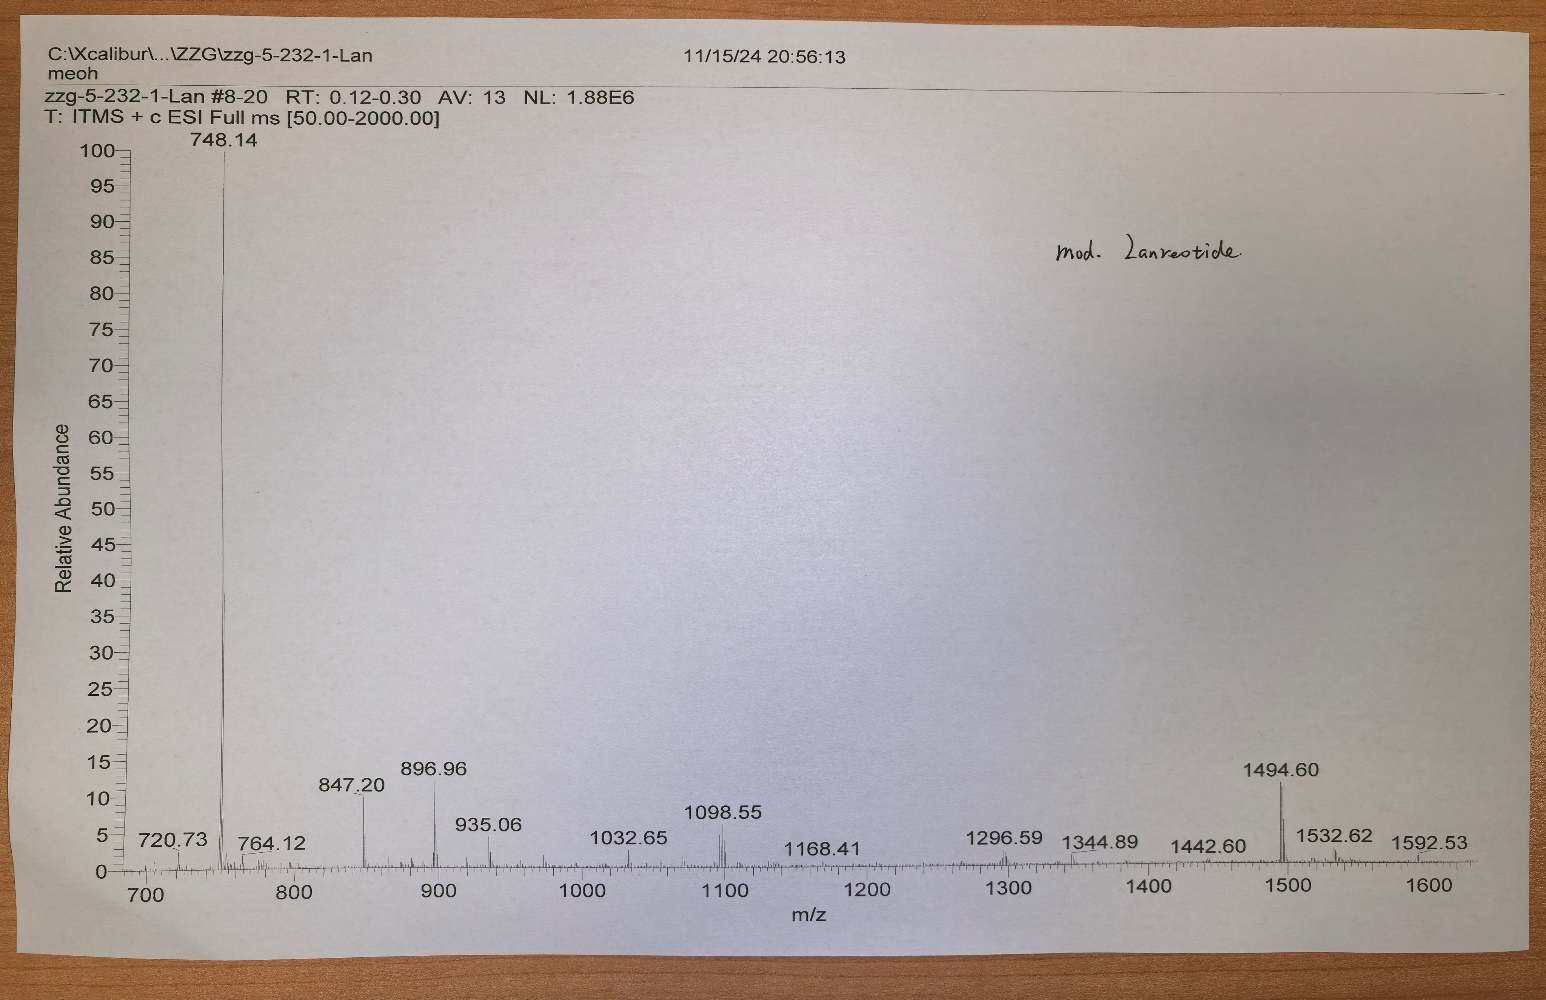


**Figure S11.** Showing LC/MS of the reductive peptide Lanreotide modified with **54**


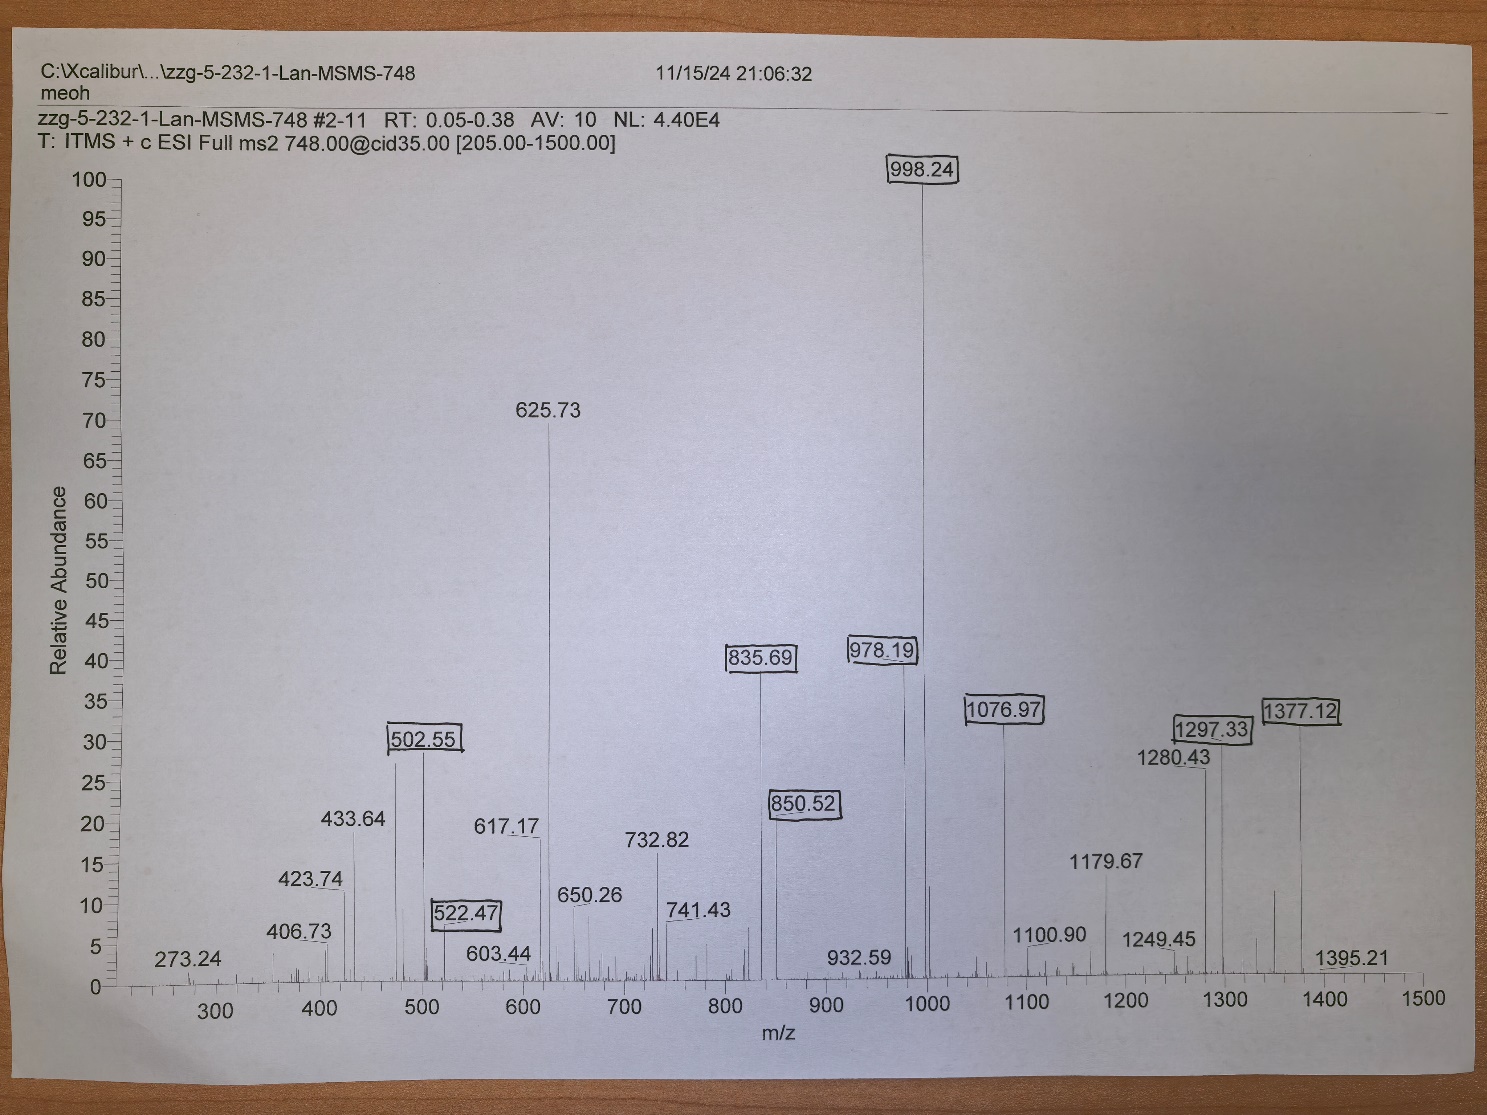


**Figure S12.** Showing MS/MS of the reductive peptide Lanreotide modified with **54.**

**
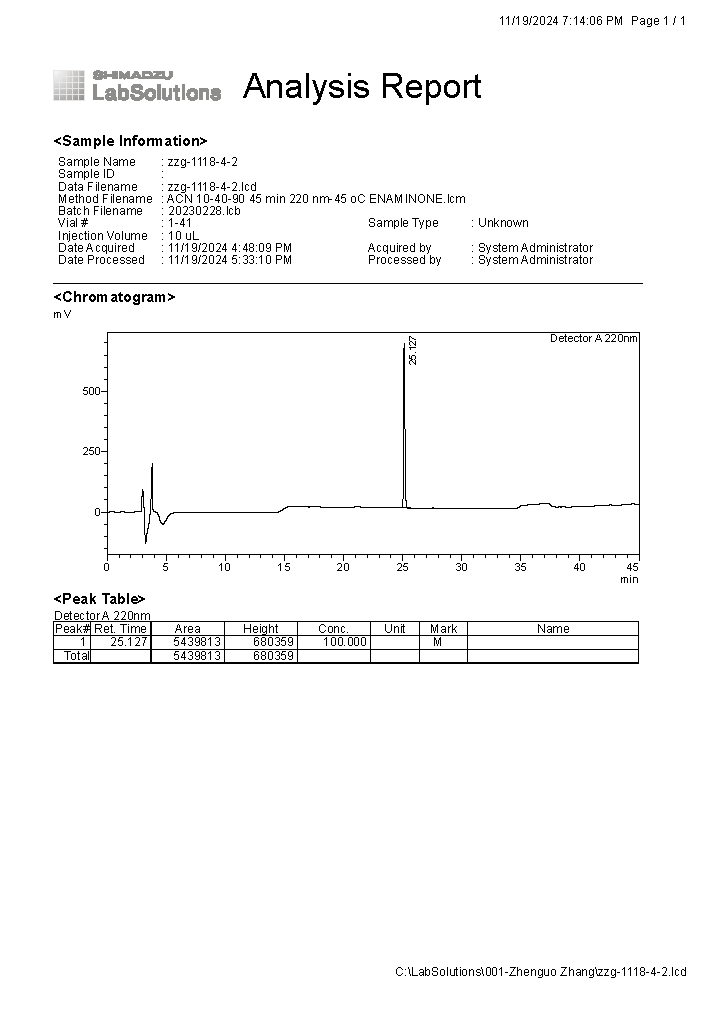
**

**Figure S13.** HPLCpurity of the modified peptide Lanreotide with **54**

**General procedure for the modification of peptides Octreotide with 54*:*** 5.0 equivalents of solid TCEP•HCl was added to 1 ml of a 2 mM solution of Octreotide (2.0 mg, 2.0 μmol, 1.0 equiv.) in PBS (Phosphate-buffered saline) buffer, pH 6.0, containing 10% DMSO. The mixture was allowed to slowly stirring at 37 ℃ in the air for 2 hours. Subsequently, the peptide solution (pH 6.0) was mixed with 100 μL solution of **54** (0.2 M in DMSO, 10.0 equiv.) and 5 μL solution of POL-PPh3(20 mM in DMSO, 0.05 equiv.). LC-MS was used to monitor the reaction. When the reaction was completed, the residue was purified by preparative HPLC to obtain the modified products, and the regio-selectivity was analyzed by LC-MS/MS.


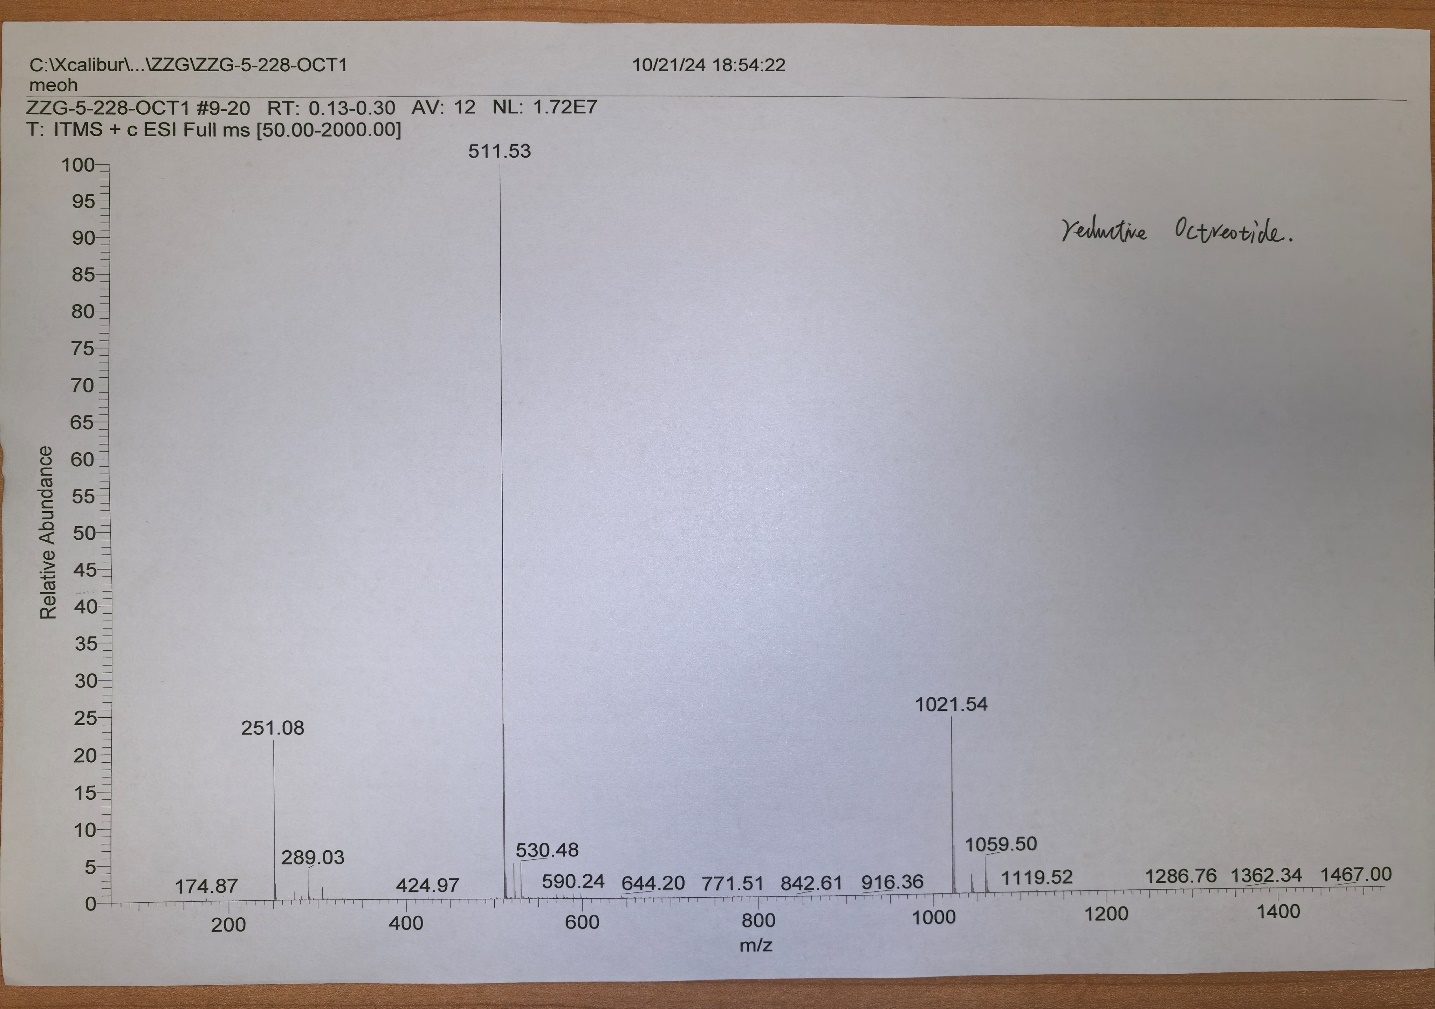


**Figure S14.** Showing LC/MS of the reductive peptide Octreotide.


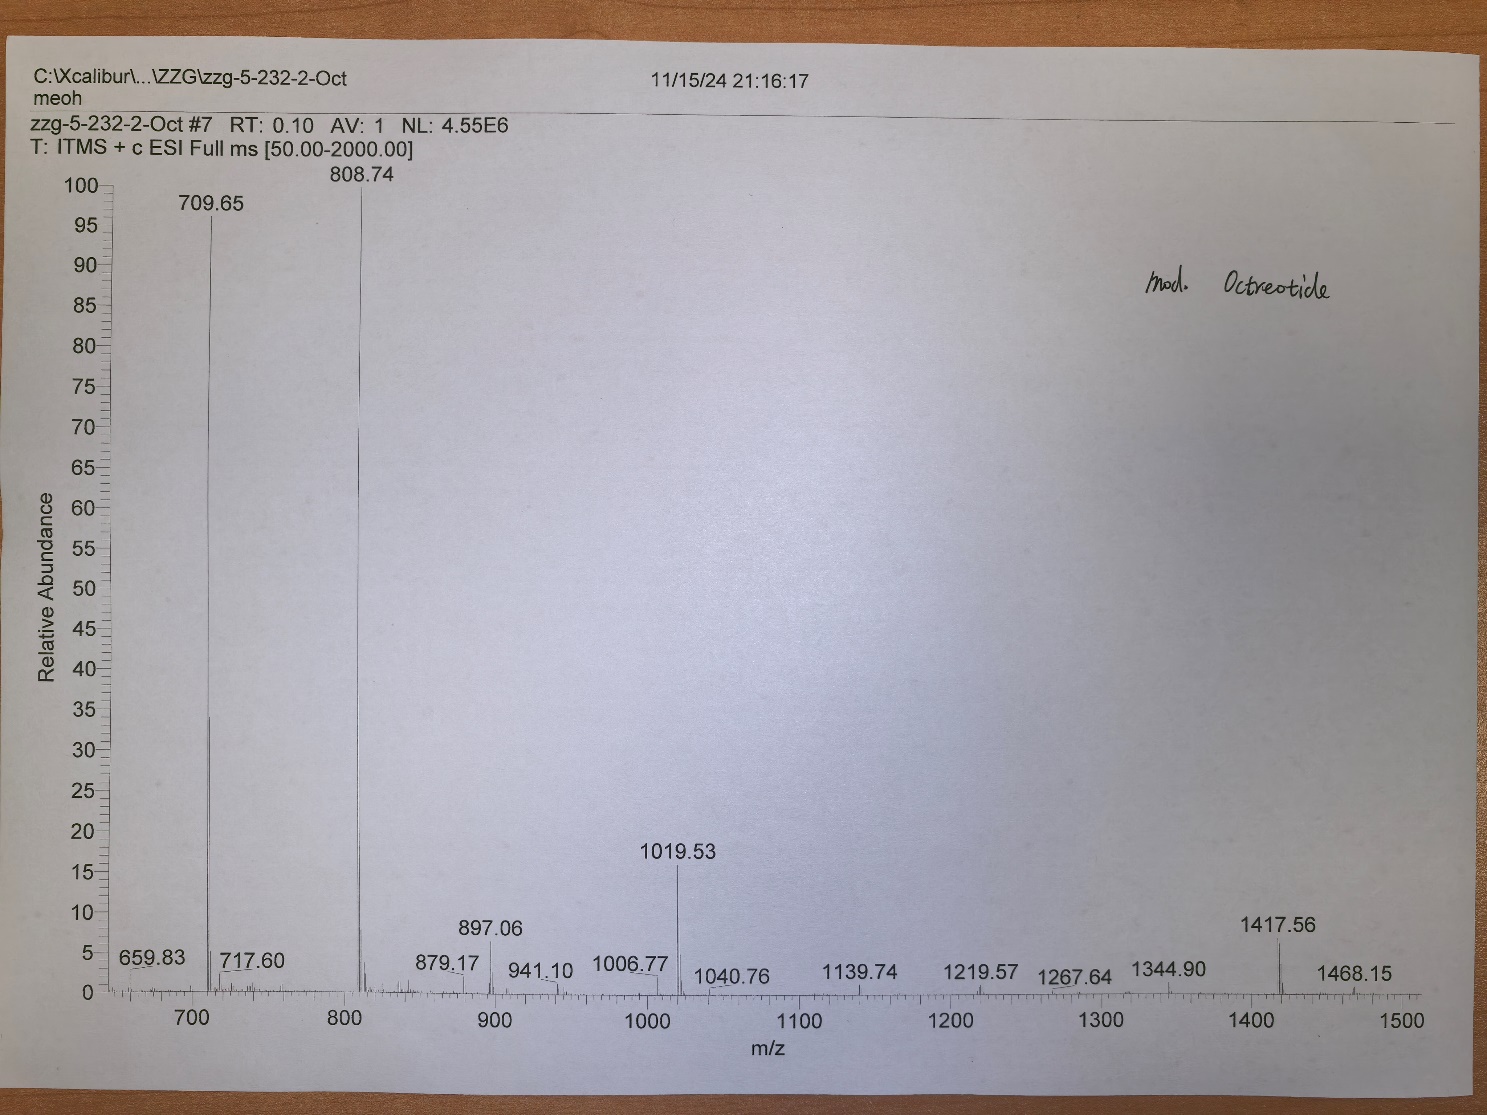


**Figure S15.** Showing LC/MS of the reductive peptide Octreotide modified with **54**


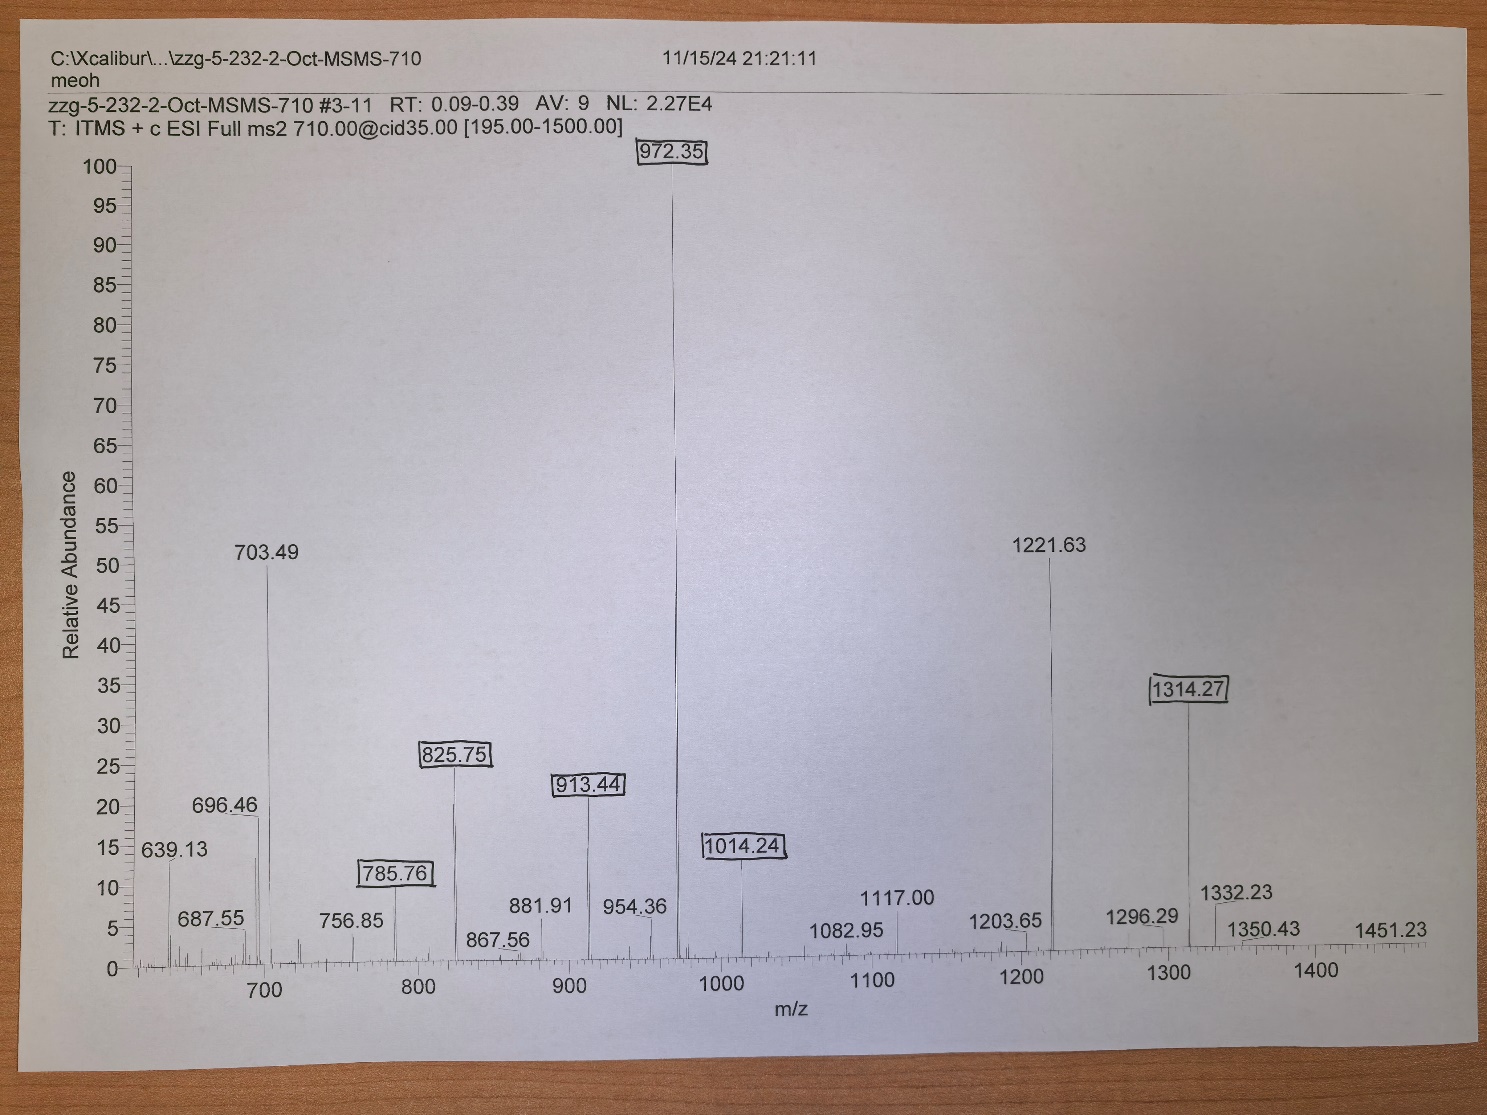


**Figure S16.** Showing MS/MS of the reductive peptide Octreotide modified with **54.**

**
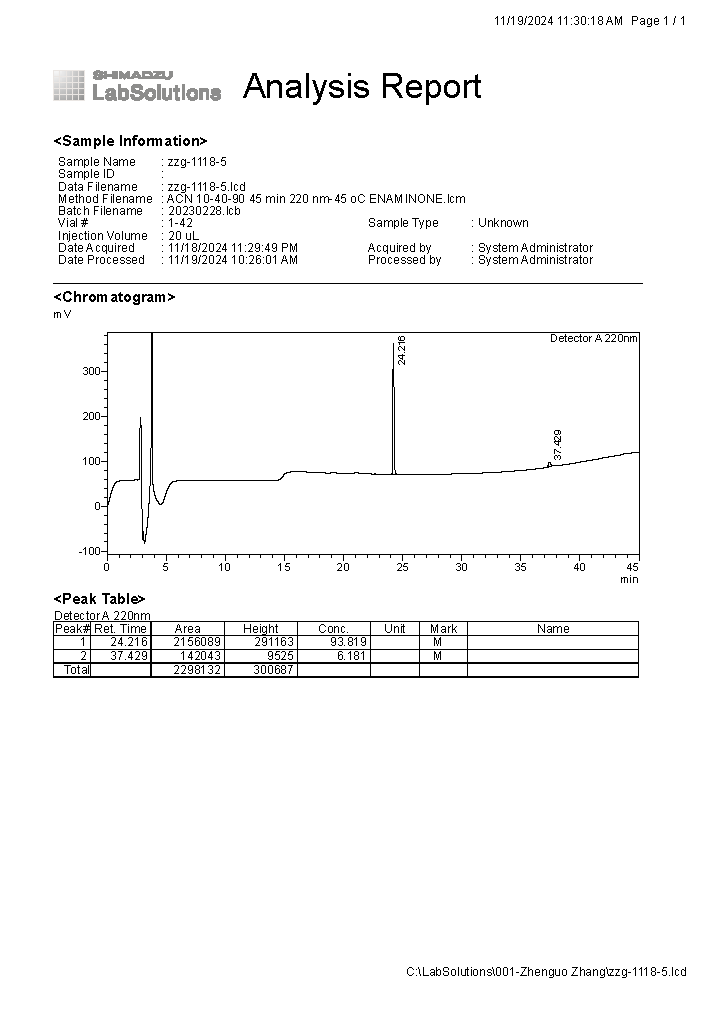
**

**Figure S17.** HPLCpurity of the modified peptide Octreotide with **54**

**General procedure for the modification of peptides Oxytocin with 54:**5.0 equivalents of solid TCEP•HCl was added to 1 ml of a 2 mM solution of Oxytocin (2.0 mg, 2.0 μmol, 1.0 equiv.) in PBS (Phosphate-buffered saline) buffer, pH 6.0, containing 10% DMSO. The mixture was allowed to slowly stirring at 37 ℃ in the air for 2 hours. Subsequently, the peptide solution (pH 6.0) was mixed with 100 μL solution of **54** (0.2 M in DMSO, 10.0 equiv.) and 5 μL solution of POL-PPh3(20 mM in DMSO, 0.05 equiv.). LC-MS was used to monitor the reaction. When the reaction was completed, the residue was purified by preparative HPLC to obtain the modified products, and the regio-selectivity was analyzed by LC-MS/MS.


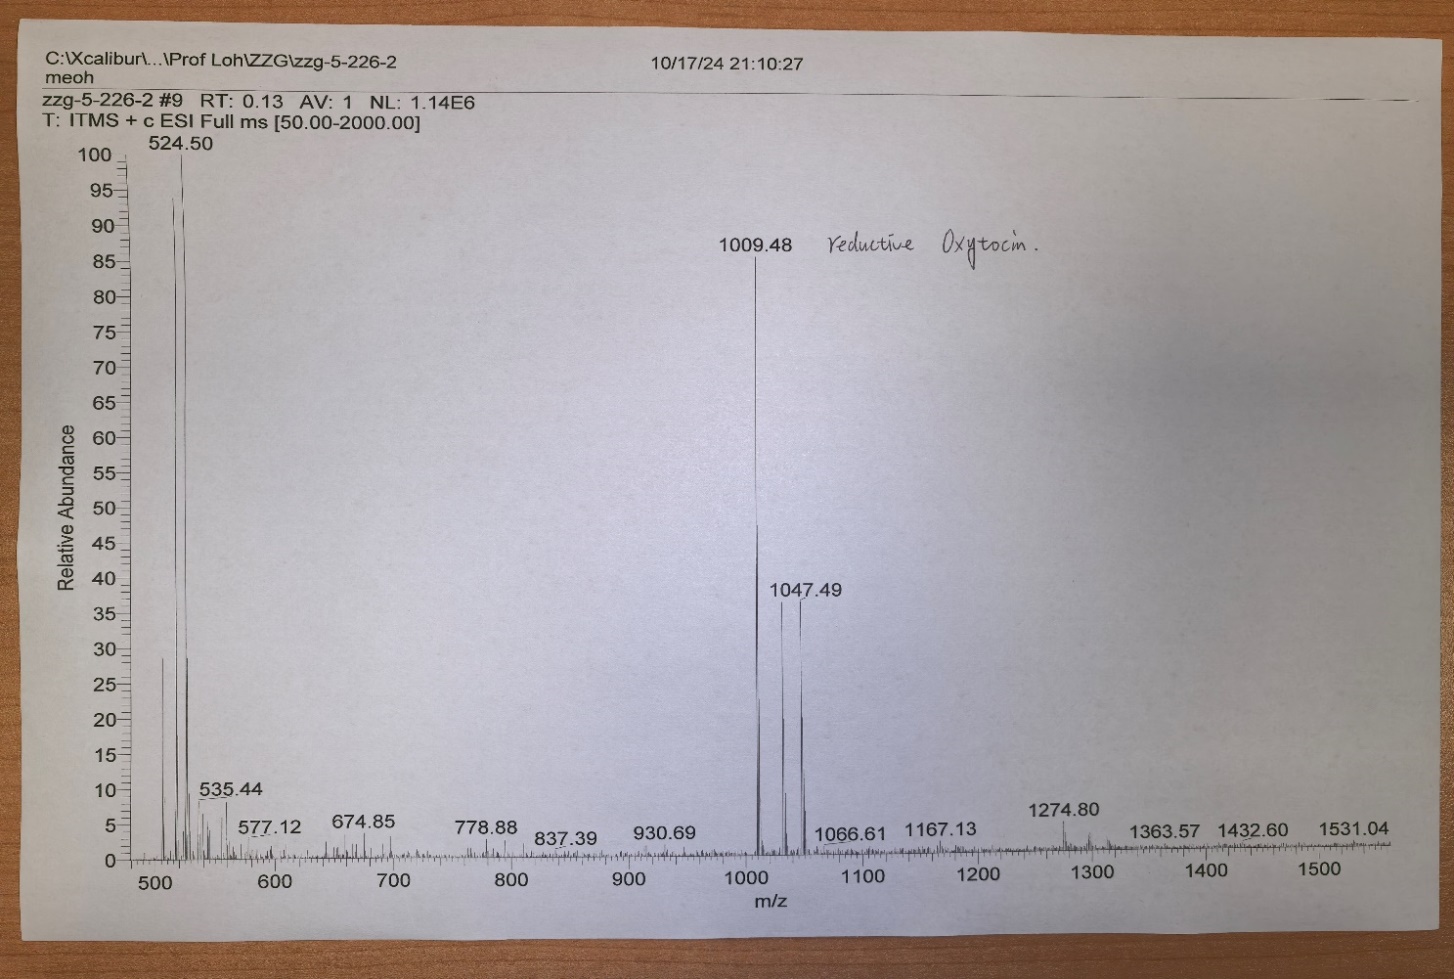


**Figure S18.** Showing LC/MS of the reductive peptide Oxytocin.


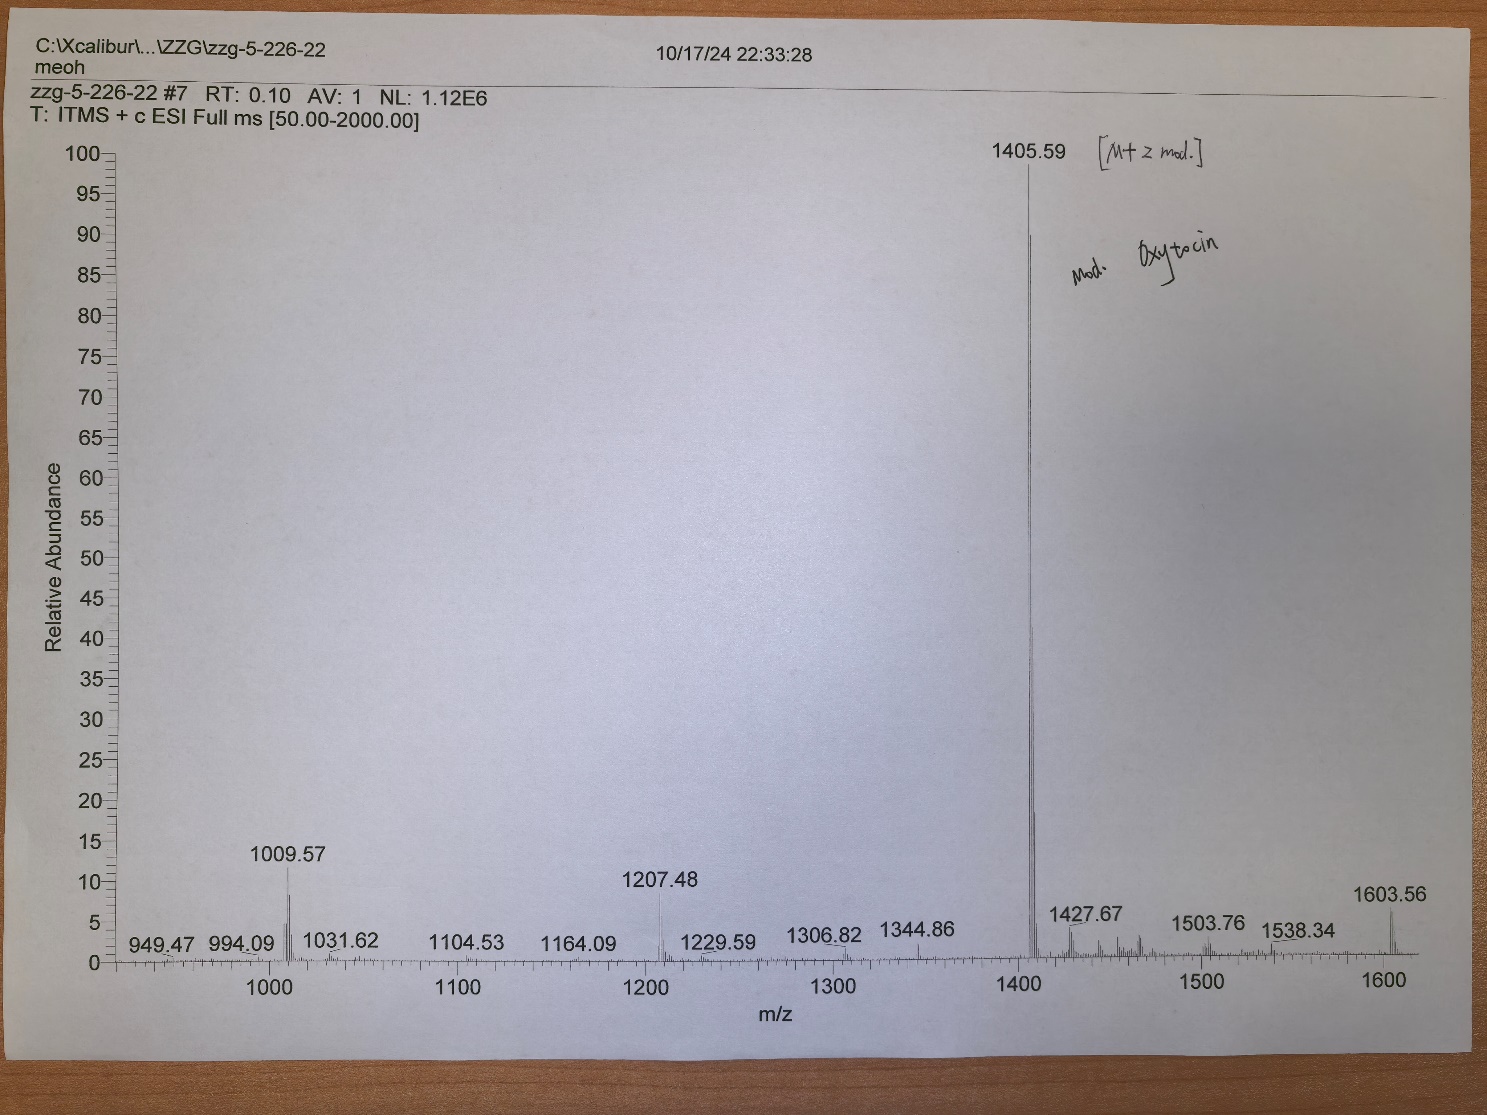


**Figure S19.** Showing LC/MS of the reductive peptide Oxytocin modified with **54**


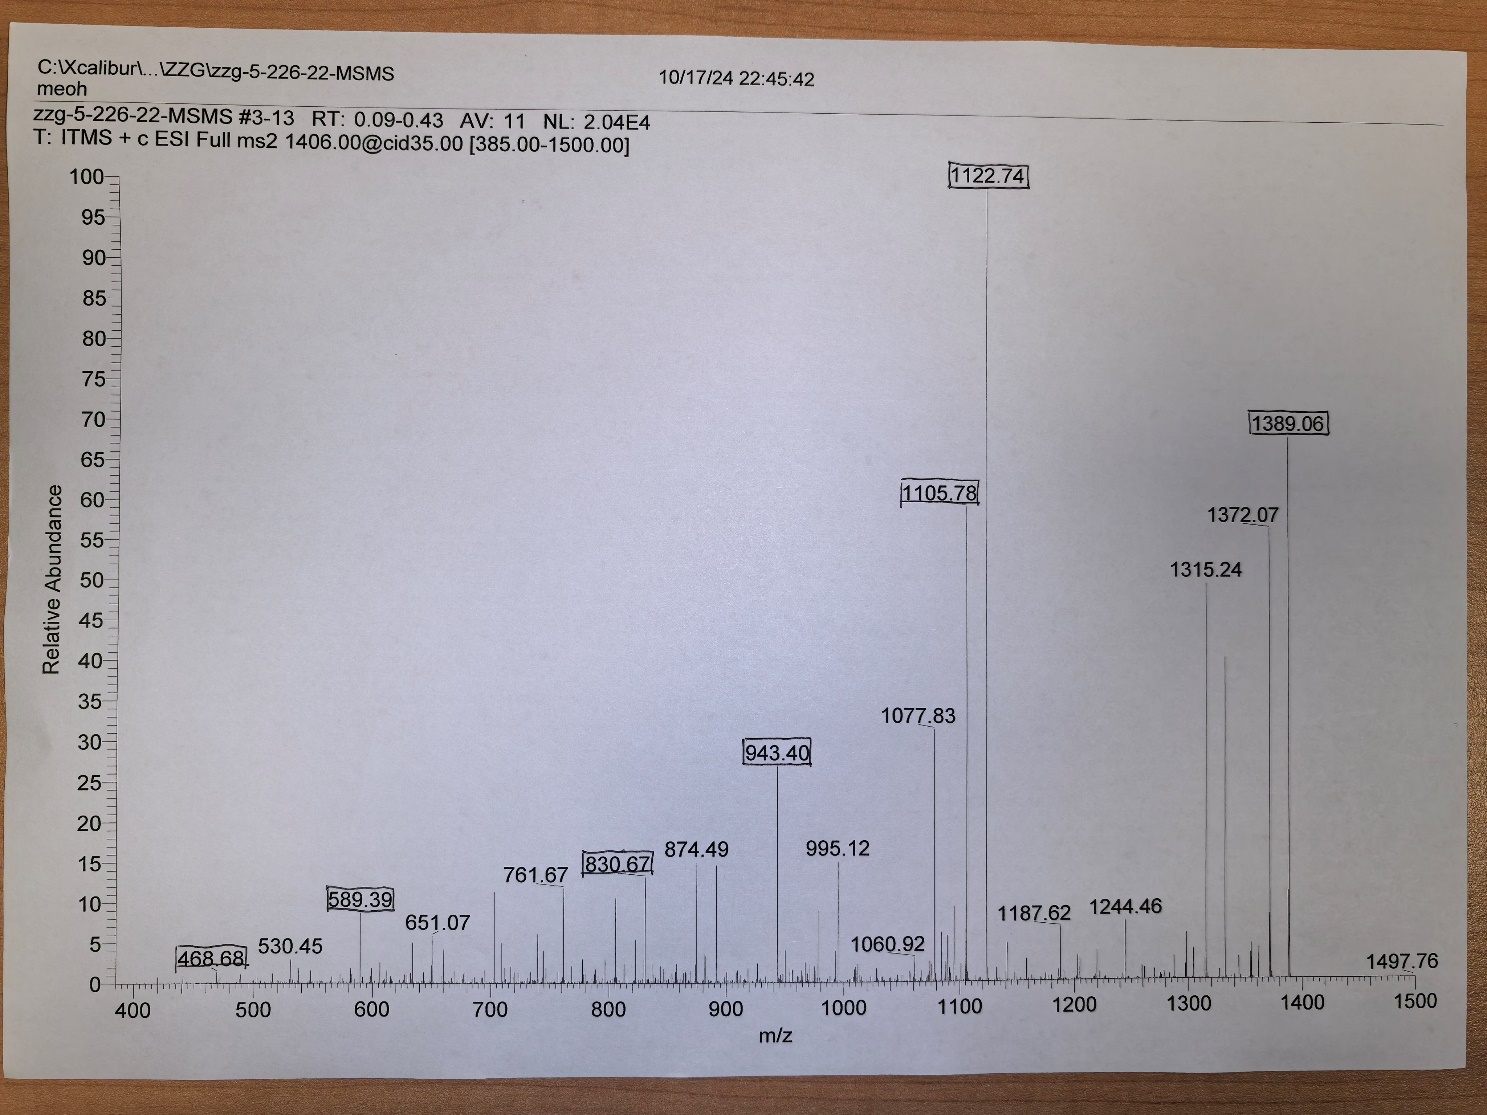


**Figure S20.** Showing MS/MS of the reductive peptide Oxytocin modified with **54.**


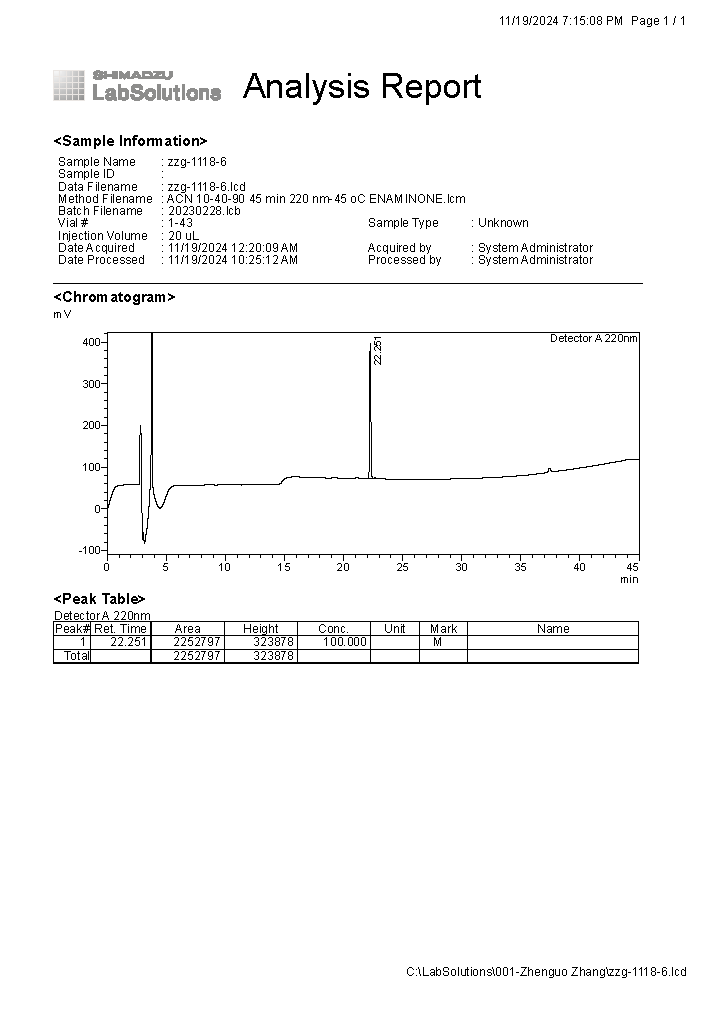


**Figure S21.** HPLCpurity of the modified peptide Oxytocin with **54**

**Protein modification**

ESI-MS was performed on a linear quadrupole ion trap detector mass spectrometer (LTQ XL from ThermoFisher Scientific) coupled to Vanquish UHPLC (from ThermoFisher Scientific). Data were processed using Thermo BioPharma Finder 3.1. Albumin from bovine serum was purchased from Sigma-Aldrich (catalog No.: A3782). Protein was used without further purification.

Sequence of albumin from bovine serum (BSA): BSA is composed of 583 amino acids and contains one free cysteine (Cys34) and 59 lysines.

DTHKSEIAHRFKDLGEEHFKGLVLIAFSQYLQQCPFDEHVKLVNELTEFAKTCVADESHAGCEKSLHTLFGDELCKVASLRETYGDMADCCEKQEPERNECFLSHKDDSPDLPKLKPDPNTLCDEFKADEKKFWGKYLYEIARRHPYFYAPELLYYANKYNGVFQECCQAEDKGACLLPKIETMREKVLTSSARQRLRCASIQKFGERALKAWSVARLSQKFPKAEFVEVTKLVTDLTKVHKECCHGDLLECADDRADLAKYICDNQDTISSKLKECCDKPLLEKSHCIAEVEKDAIPENLPPLTADFAEDKDVCKNYQEAKDAFLGSFLYEYSRRHPEYAVSVLLRLAKEYEATLEECCAKDDPHACYSTVFDKLKHLVDEPQNLIKQNCDQFEKLGEYGFQNALIVRYTRKVPQVSTPTLVEVSRSLGKVGTRCCTKPESERMPCTEDYLSLILNRLCVLHEKTPVSEKVTKCCTESLVNRRPCFSALTPDETYVPKAFDEKLFTFHADICTLPDTEKQIKKQTALVELLKHKPKATEEQLKTVMENFVAFVDKCCAADDKEACFAVEGPKLVVSTQTALA

*Procedure for reactions of albumin with* ***54****:* To a 4-mL reaction tube, **54** (5 μL, 0.2 M, 10.0 equiv.) and 5 μL solution of POL-PPh3(1.0 mM in DMSO, 0.05 equiv.) were added to 0.1 mM of albumin (6.7 mg, 0.1 μmol) in PBS buffer pH 6.0 (1.0 mL, 0.02 M). After slowly stirring for 30 min at 37 °C, a 20 μL aliquot of the reaction mixture was evaluated by performing ESI-MS, obtain the product **71**.

**Unmodified BSA**

**Figure S22.** Deconvoluted mass spectrum of **unmodified BSA**


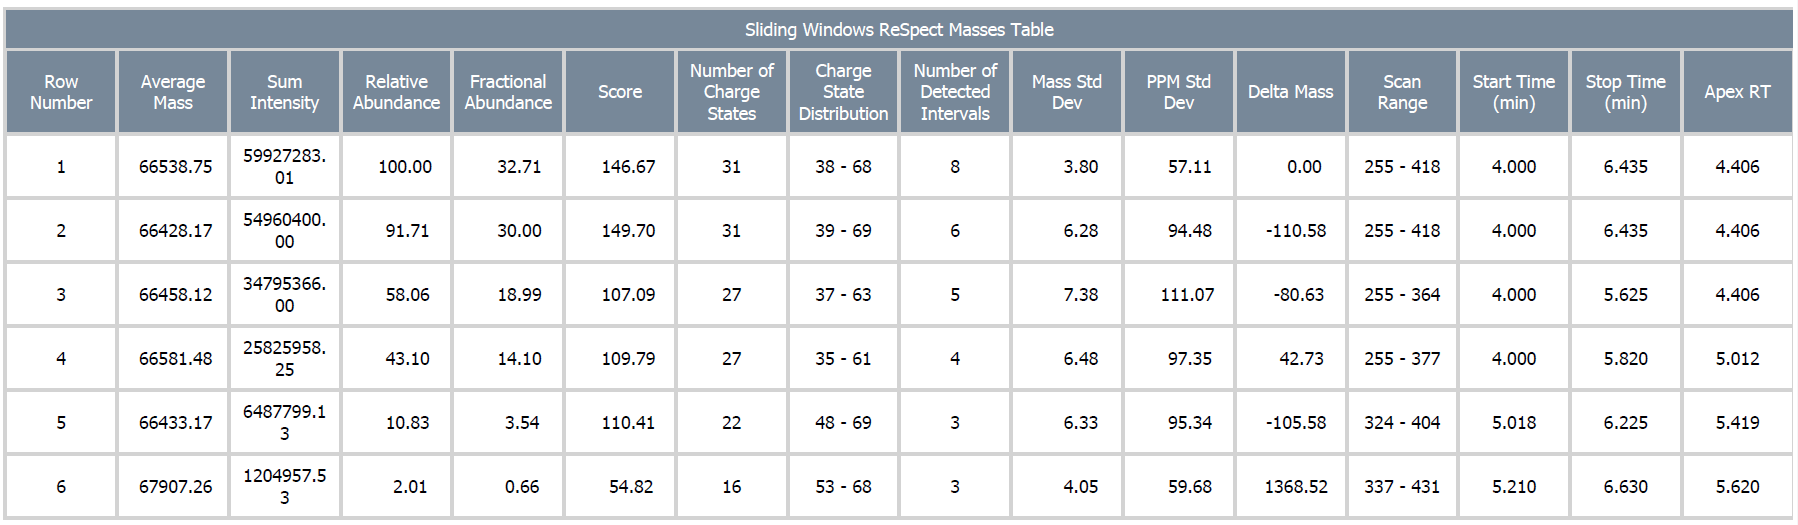


**Figure S23.** Relative abundance values of components from the **unmodified BSA**

**Modified BSA with 54**

**Figure S24.** Deconvoluted mass spectrum of modification result of **BSA** with **54：**+1 Ligand = mono-modified protein.


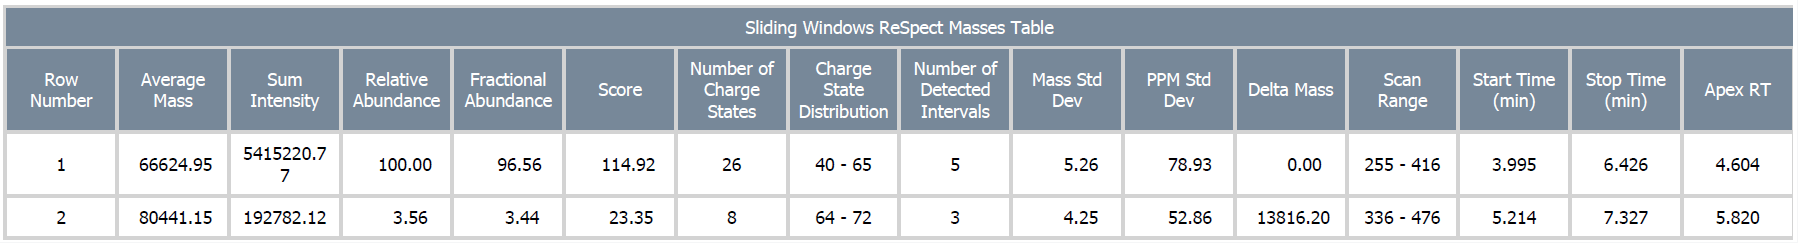


**Figure S25.** Relative abundance values of components from the **modified BSA**

**Procedure for tandem MS:**To a 4-mL reaction tube, **54** (5 μL, 0.2 M, 10.0 equiv.) and 5 μL solution of POL-PPh3(1.0 mM in DMSO, 0.05 equiv.) were added to 0.1 mM of albumin (6.7 mg, 0.1 μmol) in PBS buffer pH 6.0 (1.0 mL, 0.02 M). After slowly stirring for 30 min at 37 °C, to this was added solid TCEP hydrochloride (2.9 mg, 10 μmol, 100 equiv.), and after pipette mixing resulting mixture was incubated for 10 h at 37 °C. After due time, the protein was purified through filtration. Purified protein was subjected to trypsin digestion and LC-MS/MS using standard protocols.


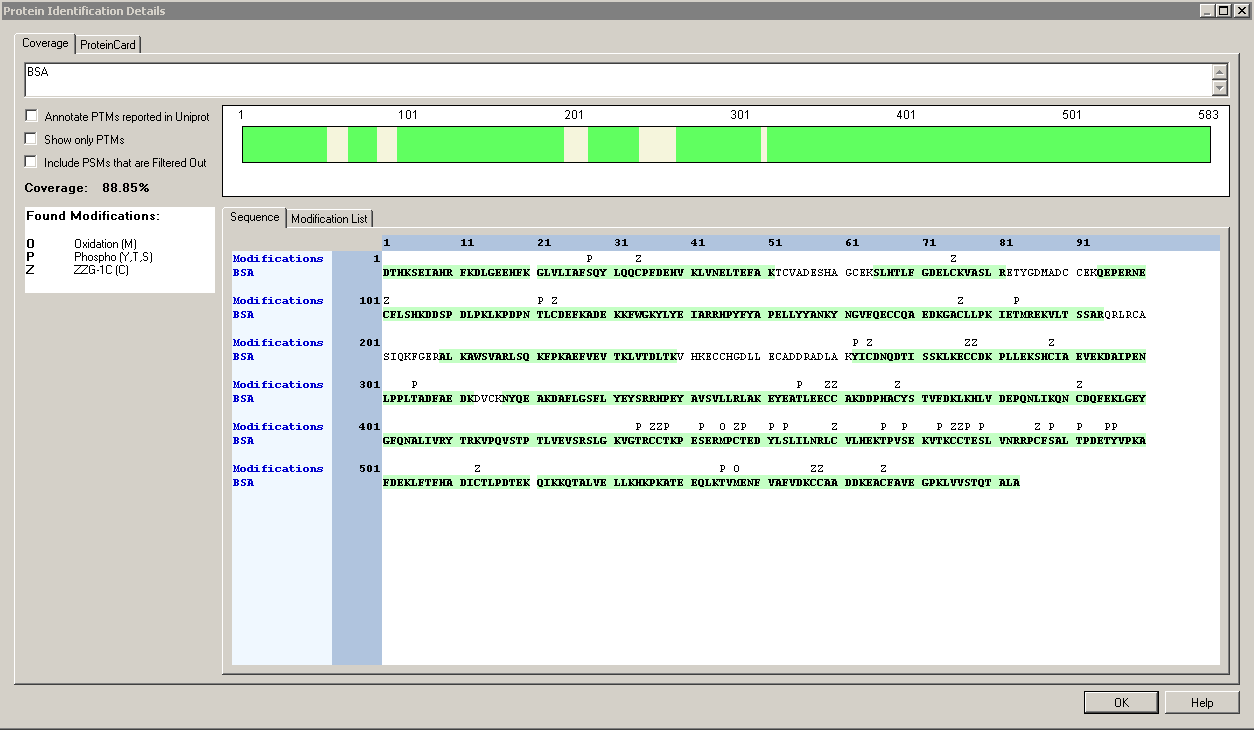


**Figure S26.** TandemMS result for the modification of **BSA** with **54**.

Dynamic Modifications:

- Max. Equal Modifications Per Peptide: 3

- Max. Dynamic Modifications Per Peptide: 4

- 1. Dynamic Modification: Oxidation / +15.995 Da (M)

- 2. Dynamic Modification: Carbamidomethyl / +57.021 Da (C)

- 3. Dynamic Modification: Phospho / +79.966 Da (S, T, Y)

- 4. Dynamic Modification: **ZZG-1C** (**71**)/ +198.068 Da (C)


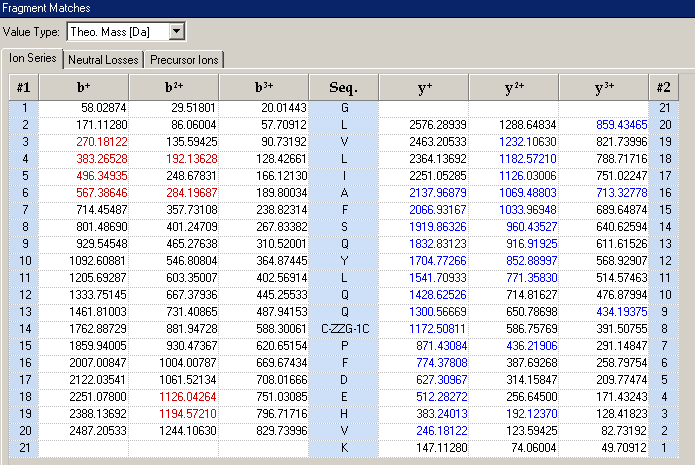


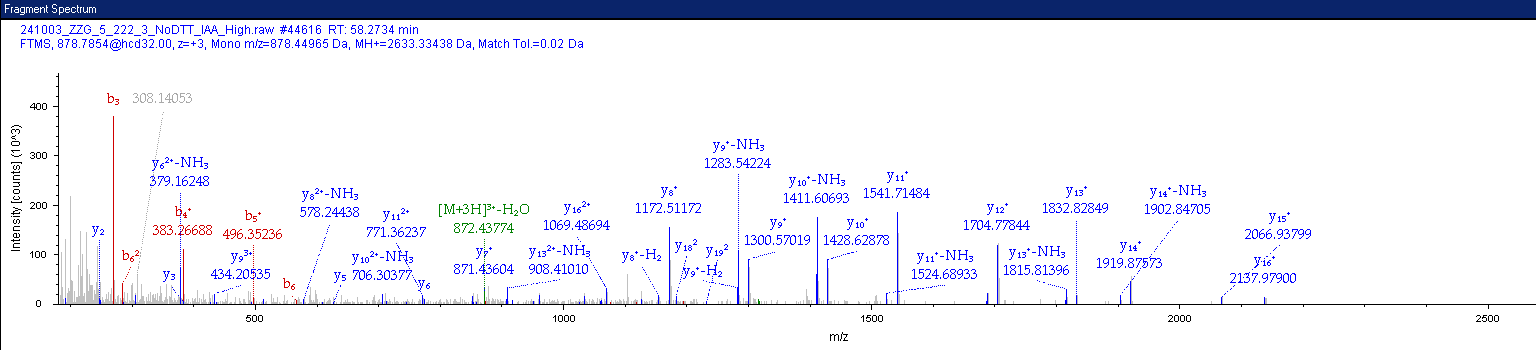


**Figure S27. Tandem MS analysis for Sequence:** GLVLIAFSQYLQQCPFDEHVK, C14-ZZG-1C (**71**) (198.06808 Da); Charge: +3, Monoisotopic m/z: 878.44965 Da (+7.85 mmu/+8.93 ppm), [M+H]+: 2633.33438 Da, RT: 58.2734 min, Identified with: Sequest HT (v1.17); XCorr:4.08, Ions matched by search engine: 0/0; Fragment match tolerance used for search: 0.02 Da; Fragments used for search: b; b-H₂O; b-NH₃; y; y-H₂O; y-NH₃.

**Figure S28.** The CD spectra of native BSA and modified BSA with **54**. The BSA concentrations were 50 μM. All the spectra were measured at 22 °C with 1cm path length.

# Analytical Data for All New Compound

**methyl (R,Z)-2-(((2-acetamido-3-ethoxy-3-oxopropyl)thio)methyl)-3-phenylacrylate (3)**

Following the general procedure, the reaction was conducted on a 0.2 mmol scale, and **3** was isolated by PTLC (Dichloromethane/methanol = 20/1) as light-yellow oil. In the case of PPh3 was selected as the catalyst, the reaction was completed in 10 minutes, with a 98% yield of **3** isolated (72 mg, E/Z = 95/5 as determined by 1H NMR). Alternatively, the POL-PPh3 delivered a 90% yield of **3** after 45 minutes (66 mg, 90% yield, E/Z = 95/5 as determined by 1H NMR). 1H NMR (400 MHz, Chloroform-*d*) δ 7.76 (s, 1H), 7.51 – 7.36 (m, 5H), 6.83 (d, *J* = 8.1 Hz, 1H), 4.88 (dt, *J* = 8.0, 4.7 Hz, 1H), 4.21 (q, *J* = 7.2 Hz, 2H), 3.87 (s, 3H), 3.75 – 3.64 (m, 2H), 3.16 – 3.01 (m, 2H), 2.06 (s, 3H), 1.27 (t, *J* = 7.1 Hz, 3H). 13C NMR (101 MHz, Chloroform-*d*) δ 170.7, 170.1, 167.8, 141. 7, 134.6, 129.5, 129.3, 128.8, 128.4, 61.8, 52.5, 52.4, 35.4, 30.2, 23.1, 14.2. IR (KBr): 3005, 1714, 1435, 1275, 1203, 750 cm-1. HRMS (ESI) m/z: [M + H]+ Calcd. for: C18H24NO5S 366.1375; Found 366.1378.

**methyl (R,Z)-2-(((2-acetamido-3-ethoxy-3-oxopropyl)thio)methyl)-3-(4-nitrophenyl)acrylate (4)**

Following the general procedure, the reaction was conducted on a 0.2 mmol scale,and **4** was isolated by PTLC (Dichloromethane/methanol = 20/1) as a white solid. In the case of PPh3 was selected as the catalyst, the reaction was completed in 2 h, with a 98% yield of **4** isolated (80 mg, E/Z = 85/15 as determined by 1H NMR). Alternatively, the POL-PPh3 delivered a 99% yield of **4** after 2 h (81 mg, E/Z = 95/5 as determined by 1H NMR). Mp: 139-140 ℃. 1H NMR (400 MHz, Chloroform-*d*) δ 8.29 (d, *J* = 8.8 Hz, 2H), 7.75 (s, 1H), 7.68 – 7.63 (m, 2H), 6.70 (d, *J* = 7.9 Hz, 1H), 4.87 (dt, *J* = 7.9, 4.8 Hz, 1H), 4.22 (qd, *J* = 7.2, 1.1 Hz, 2H), 3.90 (s, 3H), 3.71 – 3.61 (m, 2H), 3.12 – 3.07 (m, 2H), 2.07 (s, 3H), 1.29 (t, *J* = 7.1 Hz, 3H). 13C NMR (101 MHz, Chloroform-*d*) δ 170.6, 170.0, 167.0, 147.8, 140.9, 138.7, 131.8, 130.2, 124.0, 61.9, 52.8, 52.3, 35.6, 29.9, 23.1, 14.2. IR (KBr): 3901, 3650, 2989, 1715, 1519, 1275, 1261, 750 cm-1. HRMS (ESI) m/z: [M + H]+ Calcd. for: C18H23N2O7S 411.1226; Found 411.1223.

**methyl (R,Z)-2-(((2-acetamido-3-ethoxy-3-oxopropyl)thio)methyl)-3-(4-(tert-butyl)phenyl)acrylate (5)**

Following the general procedure, the reaction was conducted on a 0.2 mmol scale,and **5** was isolated by PTLC (Dichloromethane/methanol = 20/1) as light-yellow oil. In the case of PPh3 was selected as the catalyst, the reaction was completed in 3 h, with a 95% yield of **5** isolated (80 mg, E/Z = 95/5 as determined by 1H NMR). Alternatively, the POL-PPh3 catalyst delivered a 97% yield of **5** after 5 h (82 mg, E/Z = 95/5 as determined by 1H NMR). 1H NMR (400 MHz, Chloroform-*d*) δ 7.73 (s, 1H), 7.46 (s, 4H), 6.88 (d, *J* = 8.0 Hz, 1H), 4.91 (dt, *J* = 8.0, 4.6 Hz, 1H), 4.21 (q, *J* = 7.1 Hz, 2H), 3.86 (s, 3H), 3.78 – 3.67 (m, 2H), 3.19 – 3.03 (m, 2H), 2.07 (s, 3H), 1.34 (s, 9H), 1.28 (t, *J* = 7.1 Hz, 3H). 13C NMR (101 MHz, Chloroform-*d*) δ 170.7, 170.1, 168.0, 152.8, 141.7, 131.7, 129.6, 127.4, 125.8, 61.8, 52.5, 52.4, 35.4, 34.8, 31.2, 30.4, 23.1, 14.2. IR (KBr): 3902, 3735, 3566, 2963, 1715, 1275, 750, 458 cm-1. HRMS (ESI) m/z: [M + H]+ Calcd. for: C22H32NO5S 422.2001; Found 422.1992.

**methyl (R,Z)-2-(((2-acetamido-3-ethoxy-3-oxopropyl)thio)methyl)-3-(4-methoxyphenyl)acrylate (6)**

Following the general procedure, the reaction was conducted on a 0.2 mmol scale, and **6** was isolated by PTLC (Dichloromethane/methanol = 20/1) as light-yellow oil. In the case of PPh3 was selected as the catalyst, the reaction was completed in 2 h, with a 73% yield of **6** isolated (58 mg, E/Z = 93/7 as determined by 1H NMR). Alternatively, the POL-PPh3 catalyst delivered an 82% yield of **6** after 5 h (65 mg, E/Z = 96/4 as determined by 1H NMR). 1H NMR (400 MHz, Chloroform-*d*) δ 7.71 (s, 1H), 7.49 (d, *J* = 8.8 Hz, 2H), 6.99 – 6.94 (m, 2H), 6.91 (d, *J* = 8.0 Hz, 1H), 4.91 (dt, *J* = 8.0, 4.7 Hz, 1H), 4.21 (q, *J* = 7.1 Hz, 2H), 3.85 (d, *J* = 1.6 Hz, 6H), 3.78 – 3.68 (m, 2H), 3.19 – 3.03 (m, 2H), 2.08 (s, 3H), 1.28 (t, *J* = 7.1 Hz, 3H). 13C NMR (101 MHz, Chloroform-*d*) δ 170.7, 170.1, 168.1, 160.6, 141.6, 131.6, 127.0, 125.8, 114.3, 61.8, 55.4, 52.5, 52.4, 35.3, 30.4, 23.1, 14.2. IR (KBr): 3566, 2988, 1714, 1511, 1269, 1029, 750, 557 cm-1. HRMS (ESI) m/z: [M + H]+ Calcd. for: C19H26NO6S 396.1481; Found 396.1478.

**methyl(R,Z)-2-(((2-acetamido-3-ethoxy-3-oxopropyl)thio)methyl)-3-(4-fluorophenyl)acrylate (7)**

Following the general procedure, the reaction was conducted on a 0.2 mmol scale, and **7** was isolated by PTLC (Dichloromethane/methanol = 20/1) as a light-yellow solid. In the case of PPh3 was selected as the catalyst, the reaction was completed in 2 h, with a 75% yield of **7** isolated (57 mg, E/Z = 91/9 as determined by 1H NMR). Alternatively, the POL-PPh3 catalyst delivered an 89% yield of **7** after 3 h (68 mg, E/Z = 92/8 as determined by 1H NMR). Mp: 85-86 ℃. 1H NMR (400 MHz, Chloroform-*d*) δ 7.71 (s, 1H), 7.54 – 7.47 (m, 2H), 7.17 – 7.08 (m, 2H), 6.82 (d, *J* = 8.1 Hz, 1H), 4.93 – 4.85 (m, 1H), 4.22 (q, *J* = 7.1 Hz, 2H), 3.87 (s, 3H), 3.76 – 3.62 (m, 2H), 3.17 – 3.02 (m, 2H), 2.08 (s, 3H), 1.28 (t, *J* = 7.1 Hz, 3H). 13C NMR (101 MHz, Chloroform-*d*) δ 170.66, 170.08, 167.68, 163.11 (d, *J* = 250.9 Hz), 140.50, 131.63 (d, *J* = 8.4 Hz), 130.64 (d, *J* = 3.4 Hz), 128.07, 115.92 (d, *J* = 21.7 Hz), 61.82, 52.48, 52.37, 35.40, 30.08, 23.07, 14.16. 19F NMR (376 MHz, Chloroform-*d*) δ -110.68. IR (KBr): 2989, 1716, 1508, 1261, 1027, 750 cm-1. HRMS (ESI) m/z: [M + H]+ Calcd. for: C18H23NO5SF 384.1281; Found 384.1271.

**methyl(R,Z)-2-(((2-acetamido-3-ethoxy-3-oxopropyl)thio)methyl)-3-(4-chlorophenyl)acrylate (8)**

Following the general procedure, the reaction was conducted on a 0.2 mmol scale, and **8** was isolated by PTLC (Dichloromethane/methanol = 20/1) as a light-yellow solid. In the case of PPh3 was selected as the catalyst, the reaction was completed in 2 h, with a 98% yield of **8** isolated (78 mg, E/Z = 89/11 as determined by 1H NMR). Alternatively, the POL-PPh3 catalyst delivered an 89% yield of **8** after 3 h (68 mg, E/Z = 94/6 as determined by 1H NMR). Mp: 88-89 ℃. 1H NMR (400 MHz, Chloroform-*d*) δ 7.69 (s, 1H), 7.47 – 7.38 (m, 4H), 6.77 (d, *J* = 8.0 Hz, 1H), 4.88 (dt, *J* = 8.0, 4.7 Hz, 1H), 4.21 (qd, *J* = 7.2, 1.0 Hz, 2H), 3.87 (s, 3H), 3.72 – 3.61 (m, 2H), 3.15 – 3.02 (m, 2H), 2.07 (s, 3H), 1.28 (t, *J* = 7.1 Hz, 3H). 13C NMR (101 MHz, Chloroform-*d*) δ 170.6, 170.1, 167.6, 140.3, 135.4, 133.0, 130.9, 129.1, 128.9, 61.9, 52.5, 52.4, 35.5, 30.1, 23.1, 14.2. IR (KBr): 3735, 3567, 2921, 1716, 1436, 1261, 1079, 750, 458 cm-1. HRMS (ESI) m/z: [M + H]+ Calcd. for: C18H23NO5SCl 400.0985; Found 400.0990.

**methyl(R,Z)-2-(((2-acetamido-3-ethoxy-3-oxopropyl)thio)methyl)-3-(2-chlorophenyl)acrylate (9)**

Following the general procedure, the reaction was conducted on a 0.2 mmol scale,and **9** was isolated by PTLC (Dichloromethane/methanol = 20/1) as a white solid. In the case of PPh3 was selected as the catalyst, the reaction was completed in 2 h, with an 87% yield of **9** isolated (70 mg, E/Z = 98/2 as determined by 1H NMR). Mp: 74-75 ℃. 1H NMR (400 MHz, Chloroform-*d*) δ 7.83 (s, 1H), 7.55 – 7.49 (m, 1H), 7.47 – 7.42 (m, 1H), 7.39 – 7.31 (m, 2H), 6.71 (d, *J* = 8.0 Hz, 1H), 4.81 (dt, *J* = 8.0, 4.8 Hz, 1H), 4.25 – 4.13 (m, 2H), 3.89 (s, 3H), 3.56 (q, *J* = 12.1 Hz, 2H), 3.11 – 2.96 (m, 2H), 2.04 (s, 3H), 1.27 (t, *J* = 7.1 Hz, 3H). 13C NMR (101 MHz, Chloroform-*d*) δ 170.6, 170.0, 167.3, 138.3, 134.2, 133.2, 130.5, 130.3, 130.2, 129.8, 126.9, 61.8, 52.5, 52.3, 35.3, 30.0, 23.0, 14.1. IR (KBr): 3735, 3005, 1716, 1509, 1275, 750 cm-1. HRMS (ESI) m/z: [M + H]+ Calcd. for: C18H23NO5SCl 400.0985; Found 400.0975.

**methyl(R,Z)-2-(((2-acetamido-3-ethoxy-3-oxopropyl)thio)methyl)-3-(3-chlorophenyl)acrylate (10)**

Following the general procedure, the reaction was conducted on a 0.2 mmol scale, **10** was isolated by PTLC (Dichloromethane/methanol = 20/1) as light-yellow oil. In the case of PPh3 was selected as the catalyst, the reaction was completed in 2 h, with a 99% yield of **10** isolated (79 mg, E/Z = 87/13 as determined by 1H NMR). 1H NMR (400 MHz, Chloroform-*d*) δ 7.67 (s, 1H), 7.50 (d, *J* = 2.2 Hz, 1H), 7.37 (d, *J* = 3.3 Hz, 3H), 6.78 (d, *J* = 7.9 Hz, 1H), 4.92 – 4.82 (m, 1H), 4.21 (q, *J* = 7.1 Hz, 2H), 3.87 (s, 3H), 3.75 – 3.57 (m, 2H), 3.18 – 3.02 (m, 2H), 2.07 (s, 3H), 1.28 (t, *J* = 7.1 Hz, 3H). 13C NMR (101 MHz, Chloroform-*d*) δ 170.6, 170.1, 167.4, 139.9, 136.3, 134.7, 130.1, 129.7, 129.3, 129.2, 127.5, 61.9, 52.6, 52.3, 35.4, 30.0, 23.1, 14.2. IR (KBr): 3648, 3566, 2987, 1715, 1508, 1373 1275, 1260, 1027, 764, 518 cm-1. HRMS (ESI) m/z: [M + H]+ Calcd. for: C18H23NO5SCl 400.0985; Found 400.0989.

**methyl (R,Z)-2-(((2-acetamido-3-ethoxy-3-oxopropyl)thio)methyl)-3-(4-bromophenyl)acrylate (11)**

Following the general procedure, the reaction was conducted on a 0.2 mmol scale,and **11** was isolated by PTLC (Dichloromethane/methanol = 20/1) as a light-yellow solid. In the case of PPh3 was selected as the catalyst, the reaction was completed in 1.5 h, with a 97% yield of **11** isolated (86 mg, E/Z = 94/6 as determined by 1H NMR). Alternatively, the POL-PPh3 catalyst delivered a 96% yield of **11** after 3 h (85 mg, E/Z = 96/4 as determined by 1H NMR). Mp: 80-81 ºC. 1H NMR (400 MHz, Chloroform-*d*) δ 7.67 (s, 1H), 7.56 (d, *J* = 8.2 Hz, 2H), 7.37 (d, *J* = 8.2 Hz, 2H), 6.89 (d, *J* = 8.0 Hz, 1H), 4.88 (dt, *J* = 9.0, 4.9 Hz, 1H), 4.21 (q, *J* = 7.1 Hz, 2H), 3.86 (s, 3H), 3.75 – 3.60 (m, 2H), 3.14 – 3.00 (m, 2H), 2.07 (s, 3H), 1.28 (t, *J* = 7.1 Hz, 3H). 13C NMR (101 MHz, Chloroform-*d*) δ 170.6, 170.1, 167.5, 140.3, 133.4, 132.0, 131.1, 129.0, 123.6, 61.8, 52.5, 52.4, 35.4, 30.0, 23.0, 14.2. IR (KBr): 3735, 3648, 3566, 1716, 1508, 1261, 764, 458 cm-1. HRMS (ESI) m/z: [M + H]+ Calcd. for: C18H23NO5SBr 444.0480; Found 444.0484.

**methyl (R,Z)-2-(((2-acetamido-3-ethoxy-3-oxopropyl)thio)methyl)-3-(m-tolyl)acrylate (12)**

Following the general procedure, the reaction was conducted on a 0.2 mmol scale,and **12** was isolated by PTLC (Dichloromethane/methanol = 20/1) as light-yellow oil. In the case of PPh3 was selected as the catalyst, the reaction was completed in 1.5 h, with a 99% yield of **12** isolated (75 mg, E/Z = 92/8 as determined by 1H NMR). 1H NMR (400 MHz, Chloroform-*d*) δ 7.73 (s, 1H), 7.35 – 7.28 (m, 2H), 7.19 (dd, *J* = 5.3, 3.1 Hz, 1H), 6.86 (d, *J* = 8.1 Hz, 1H), 4.87 (dt, *J* = 8.1, 4.8 Hz, 1H), 4.20 (q, *J* = 7.1 Hz, 2H), 3.86 (s, 3H), 3.74 – 3.63 (m, 2H), 3.18 – 3.00 (m, 2H), 2.39 (s, 3H), 2.06 (s, 3H), 1.27 (t, *J* = 7.1 Hz, 3H). 13C NMR (101 MHz, Chloroform-*d*) δ 170.7, 170.1, 167.9, 141.8, 138.4, 134.5, 130.2, 130.1, 128.7, 128.2, 126.5, 61.8, 52.4, 52.4, 35.3, 30.2, 23.0, 21.4, 14.2. IR (KBr): 3840, 3648, 3566, 2986, 1714, 1532, 1275, 1079, 764, 592 cm-1. HRMS (ESI) m/z: [M + H]+ Calcd. for: C19H26NO5S 380.1532; Found 380.1526.

**methyl (R,Z)-2-(((2-acetamido-3-ethoxy-3-oxopropyl)thio)methyl)-3-(4-formylphenyl)acrylate (13)**

Following the general procedure, the reaction was conducted on a 0.2 mmol scale, and **13** was isolated by PTLC (Dichloromethane/methanol = 20/1) as a light-yellow solid. In the case of PPh3 was selected as the catalyst, the reaction was completed in 0.5 h, with an 88% yield of **13** isolated (69 mg, E/Z = 90/10 as determined by 1H NMR). Alternatively, the POL-PPh3 catalyst delivered a 93% yield of **13** after 3 h (73 mg, E/Z = 91/9 as determined by 1H NMR). Mp: 111-112 ºC. 1H NMR (400 MHz, Chloroform-*d*) δ 10.05 (s, 1H), 7.98 – 7.92 (m, 2H), 7.76 (s, 1H), 7.65 (d, *J* = 7.9 Hz, 2H), 6.72 (d, *J* = 8.0 Hz, 1H), 4.87 (dt, *J* = 8.0, 4.7 Hz, 1H), 4.22 (q, *J* = 7.1 Hz, 2H), 3.89 (s, 3H), 3.73 – 3.61 (m, 2H), 3.15 – 3.03 (m, 2H), 2.07 (s, 3H), 1.28 (t, *J* = 7.2 Hz, 3H). 13C NMR (101 MHz, Chloroform-*d*) δ 191.7, 170.7, 170.2, 167.4, 140.5, 140.0, 136.3, 130.9, 130.1, 62.0, 52.8, 52.4, 35.6, 30.1, 23.2, 14.3. IR (KBr): 3735, 3566, 2989, 1698, 1526, 1435, 1275, 828, 764, 458 cm-1. HRMS (ESI) m/z: [M + H]+ Calcd. for: C19H24NO6S 394.1324; Found 394.1321.

**methyl (R,Z)-2-(((2-acetamido-3-ethoxy-3-oxopropyl)thio)methyl)-3-(perfluorophenyl)acrylate (14)**

Following the general procedure, the reaction was conducted on a 0.2 mmol scale,and **14** was isolated by PTLC (Dichloromethane/methanol = 20/1) as a light-yellow solid. In PBS (7.0 pH)/EtOH= 9/1 solvent, POL-PPh3 catalyst delivered a 75% yield of **14** after 6 h (68 mg, E/Z = 93/7 as determined by 1H NMR). Mp: 94-95 ºC. 1H NMR (400 MHz, Chloroform-*d*) δ 7.25 (s, 1H), 6.33 (d, *J* = 7.9 Hz, 1H), 4.60 – 4.54 (m, 1H), 4.16 (q, *J* = 7.1 Hz, 2H), 3.86 (s, 3H), 3.45 – 3.36 (m, 2H), 2.82 (qd, *J* = 14.0, 5.3 Hz, 2H), 2.00 (s, 3H), 1.25 (t, 3H). 13C NMR (101 MHz, Chloroform-d) δ 170.7, 169.9, 166.0, 145.1 (m), 142.6 (m), 140.4(m), 139.2 (m), 137.4, 136.7 (m), 123.4, 109.5 (m), 62.0, 52.8, 51.8, 34.8, 30.1, 23.0, 14.1. 19F NMR (376 MHz, Chloroform*-d*) δ -137.5 (d, *J* = 22.5 Hz), -152.1 (t, *J* = 20.3 Hz), -160.7 (t, *J* = 21.1 Hz). IR (KBr): 2989, 1729, 1700, 1521, 1497, 1275, 1261, 1201, 764, 750 cm-1. HRMS (ESI) m/z: [M + H]+ Calcd. for: C18H19NO5SF5 456.0904; Found 456.0895.

**methyl (R,Z)-2-(((2-acetamido-3-ethoxy-3-oxopropyl)thio)methyl)-3-(naphthalen-1-yl)acrylate (15)**

Following the general procedure, the reaction was conducted on a 0.2 mmol scale,and **15** was isolated by PTLC (Dichloromethane/methanol = 20/1) as a light-yellow solid. In the case of PPh3 was selected as the catalyst, the reaction was completed in 0.5 h, with a 99% yield of **15** isolated (82 mg, E/Z > 98/2 as determined by 1H NMR). Alternatively, the POL-PPh3 catalyst delivered a 90% yield of **15** after 2 h (75 mg, E/Z = 94/6 as determined by 1H NMR). Mp: 96-97 ºC. 1H NMR (400 MHz, Chloroform-*d*) δ 8.27 (s, 1H), 7.91 – 7.84 (m, 3H), 7.59 – 7.49 (m, 4H), 6.64 (d, *J* = 8.0 Hz, 1H), 4.75 (dt, *J* = 7.9, 4.7 Hz, 1H), 4.19 – 4.06 (m, 2H), 3.92 (s, 3H), 3.65 – 3.50 (m, 2H), 3.04 – 2.87 (m, 2H), 1.98 (s, 3H), 1.21 (t, *J* = 7.1 Hz, 3H). 13C NMR (101 MHz, Chloroform-*d*) δ 170.6, 170.1, 167.5, 139.8, 133.4, 131.8, 131.4, 130.8, 129.5, 128.7, 126.7, 126.6, 126.4, 125.4, 124.4, 61.7, 52.5, 52.3, 35.3, 30.3, 23.0, 14.1. IR (KBr): 3647, 3566, 2986, 1716, 1532, 1373, 1260, 1195, 1026, 764, 518 cm-1. HRMS (ESI) m/z: [M + H]+ Calcd. for: C22H26NO5S 416.1532; Found 416.1529.

**methyl (R,Z)-2-(((2-acetamido-3-ethoxy-3-oxopropyl)thio)methyl)-3-(furan-2-yl)acrylate (16)**

Following the general procedure, the reaction was conducted on a 0.2 mmol scale,and **16** was isolated by PTLC (Dichloromethane/methanol = 20/1) as a light-yellow solid. In the case of PPh3 was selected as the catalyst, the reaction was completed in 0.5 h, with a 98% yield of **16** isolated (70 mg, E/Z = 90/10 as determined by 1H NMR). Alternatively, the POL-PPh3 catalyst delivered a 98% yield of **16** after 2 h (70 mg, E/Z = 92/8 as determined by 1H NMR). Mp: 103-104 ºC. 1H NMR (400 MHz, Chloroform-*d*) δ 7.60 (d, *J* = 1.7 Hz, 1H), 7.43 (s, 1H), 6.72 (d, *J* = 3.5 Hz, 1H), 6.61 (d, *J* = 8.0 Hz, 1H), 6.54 – 6.51 (m, 1H), 4.88 (dt, *J* = 8.0, 5.1 Hz, 1H), 4.19 (q, *J* = 7.2 Hz, 2H), 4.02 (d, *J* = 12.6 Hz, 1H), 3.87 (d, *J* = 12.6 Hz, 1H), 3.83 (s, 3H), 3.09 – 2.99 (m, 2H), 2.07 (s, 3H), 1.26 (t, *J* = 7.1 Hz, 3H). 13C NMR (101 MHz, Chloroform-*d*) δ 170.8, 170.0, 167.9, 150.6, 145.3, 126.6, 124.6, 117.4, 112.4, 61.7, 52.4, 52.2, 34.5, 29.4, 23.1, 14.1. IR (KBr): 3841, 3735, 3567, 2988, 1710, 1435, 1276, 1021, 750, 472 cm-1. HRMS (ESI) m/z: [M + H]+ Calcd. for: C16H22NO6S 356.1168; Found 356.1176.

**methyl (R,Z)-2-(((2-acetamido-3-ethoxy-3-oxopropyl)thio)methyl)-3-(4-((trimethylsilyl)ethynyl)phenyl)acrylate (17)**

Following the general procedure, the reaction was conducted on a 0.2 mmol scale, and **17** was isolated by PTLC (Dichloromethane/methanol = 20/1) as light-yellow oil. In the case of PPh3 was selected as the catalyst, the reaction was completed in 4 h, with a 94% yield of **17** isolated (87 mg, E/Z = 92/8 as determined by 1H NMR). Alternatively, in PBS (7.0 pH)/EtOH= 9/1 solvent, the POL-PPh3 catalyst delivered a 90% yield of **17** after 4.5 h (83 mg, E/Z = 92/8 as determined by 1H NMR). 1H NMR (400 MHz, Chloroform-*d*) δ 7.71 (s, 1H), 7.52 (d, *J* = 8.3 Hz, 2H), 7.44 (d, *J* = 8.3 Hz, 2H), 6.81 (d, *J* = 8.0 Hz, 1H), 4.89 (dt, *J* = 7.9, 4.6 Hz, 1H), 4.27 – 4.15 (m, 2H), 3.87 (s, 3H), 3.73 – 3.62 (m, 2H), 3.16 – 2.99 (m, 2H), 2.07 (s, 3H), 1.28 (t, *J* = 7.1 Hz, 3H), 0.26 (s, 9H). 13C NMR (101 MHz, Chloroform-*d*) δ 170.8, 170.2, 167.7, 140.9, 134.6, 132.3, 129.5, 128.9, 124.2, 104.5, 96.6, 62.0, 52.6, 52.5, 35.5, 30.3, 23.2, 14.3, -0.0. IR (KBr): 3648, 3566, 3293, 2955, 2156, 1716, 1660, 1532, 1373, 1276, 1078, 844, 764, 557 cm-1. HRMS (ESI) m/z: [M + H]+ Calcd. for: C23H32NO5SSi 462.1770; Found 462.1774.

**methyl (R,Z)-2-(((2-acetamido-3-ethoxy-3-oxopropyl)thio)methyl)hex-2-enoate (18)**

Following the general procedure, the reaction was conducted on a 0.2 mmol scale, and **18** was isolated by PTLC (Dichloromethane/methanol = 20/1) as a light-yellow oil. In the case of PPh3 was selected as the catalyst, the reaction was completed in 0.5 h, with a 98% yield of **18** isolated (65 mg, E/Z = 88/12 as determined by 1H NMR). Alternatively, the POL-PPh3 catalyst delivered a 91% yield of **18** after 1 h (60 mg, E/Z = 90/10 as determined by 1H NMR).1H NMR (400 MHz, Chloroform-*d*) δ 6.87 (t, *J* = 7.7 Hz, 1H), 6.74 (d, *J* = 8.0 Hz, 1H), 4.87 (dt, *J* = 8.0, 5.0 Hz, 1H), 4.26 – 4.18 (m, 2H), 3.78 (s, 3H), 3.50 (q, *J* = 12.5 Hz, 2H), 3.05 – 2.87 (m, 2H), 2.22 (q, *J* = 7.5 Hz, 2H), 2.08 (s, 3H), 1.57 – 1.43 (m, 2H), 1.29 (t, *J* = 7.1 Hz, 3H), 0.96 (t, *J* = 7.4 Hz, 3H). 13C NMR (101 MHz, Chloroform-*d*) δ 170.9, 170.2, 167.4, 146.0, 128.6, 61.9, 52.3, 52.2, 34.7, 31.0, 28.4, 23.2, 22.1, 14.2, 14.0. IR (KBr): 3648, 3566, 3292, 2960, 1716, 1532, 1435, 1261, 1027, 750 cm-1. HRMS (ESI) m/z: [M + H]+ Calcd. for: C15H26NO5S 332.1532; Found 332.1526.

**methyl (R,Z)-2-(((2-acetamido-3-ethoxy-3-oxopropyl)thio)methyl)-3-cyclohexylacrylate (19)**

Following the general procedure, the reaction was conducted on a 0.2 mmol scale, and **19** was isolated by PTLC (Dichloromethane/methanol = 20/1) as a light-yellow oil. In the case of PPh3 was selected as the catalyst, the reaction was completed in 2 h, with an 88% yield of **19** isolated (65 mg, E/Z = 82/18 as determined by 1H NMR). Alternatively, the POL-PPh3 catalyst delivered an 82% yield of **19** after 3 h (61 mg, E/Z = 89/11 as determined by 1H NMR).1H NMR (400 MHz, Chloroform-*d*) δ 6.76 (d, *J* = 8.2 Hz, 1H), 6.68 (d, *J* = 10.4 Hz, 1H), 4.89 (dt, *J* = 8.4, 4.9 Hz, 1H), 4.22 (q, *J* = 7.1 Hz, 2H), 3.77 (d, *J* = 0.8 Hz, 3H), 3.57 – 3.44 (m, 2H), 3.07 – 2.95 (m, 2H), 2.41 – 2.28 (m, 1H), 2.09 (s, 3H), 1.78 – 1.61 (m, 5H), 1.46 – 1.31 (m, 2H), 1.30 – 1.24 (m, 3H), 1.23 – 1.10 (m, 3H). 13C NMR (101 MHz, Chloroform-*d*) δ 170.8, 170.2, 167.8, 150.9, 126.5, 61.9, 52.3, 52.2, 38.2, 34.9, 32.3, 32.2, 28.7, 25.8, 25.4, 23.2, 14.2. IR (KBr): 3735, 3567, 3294, 2928, 2852, 1716, 1537, 1372, 1261, 1193, 1029, 750, 591 cm-1. HRMS (ESI) m/z: [M + H]+ Calcd. for: C18H30NO5S 372.1845; Found 372.1837.

**dimethyl 3,3'-(1,4-phenylene)(2Z,2'Z)-bis(2-((((R)-2-acetamido-3-ethoxy-3-oxopropyl)thio)methyl)acrylate) (20)**

Following the general procedure, the reaction was conducted on a 0.2 mmol scale, and **20** was isolated by PTLC (Dichloromethane/methanol = 20/1) as light-yellow oil. In the case of PPh3 was selected as the catalyst, the reaction was completed in 1 h, with an 84% yield of **20** isolated (110 mg, E/Z = 92/8 as determined by 1H NMR). 1H NMR (400 MHz, Chloroform-*d*) δ 7.74 (s, 2H), 7.58 (s, 4H), 6.90 (d, *J* = 8.0 Hz, 2H), 4.90 (dt, *J* = 8.8, 4.7 Hz, 2H), 4.21 (q, *J* = 7.1 Hz, 4H), 3.88 (s, 6H), 3.72 (q, *J* = 11.8 Hz, 4H), 3.18 – 3.05 (m, 4H), 2.07 (s, 6H), 1.28 (t, *J* = 7.1 Hz, 6H). 13C NMR (101 MHz, Chloroform-*d*) δ 170.7, 170.1, 167.6, 140.6, 135.4, 130.0, 129.2, 61.8, 52.6, 52.4, 35.5, 30.2, 23.1, 14.2. IR (KBr): 3005, 2989, 1715, 1508, 1455, 1374, 1275, 1261, 750 cm-1. HRMS (ESI) m/z: [M + H]+ Calcd. for: C30H41N2O10S2 653.2203; Found 653.2198.

**ethyl (R)-2-(((2-acetamido-3-ethoxy-3-oxopropyl)thio)methyl)acrylate (21)**

Following the general procedure, the reaction was conducted on a 0.2 mmol scale, **21** was isolated by PTLC (Dichloromethane/methanol = 20/1) as light-yellow oil. In the case of PPh3 was selected as the catalyst, the reaction was completed in 10 minutes, with an 98% yield of **21** isolated (57 mg). Alternatively, the POL-PPh3 catalyst delivered an 98% yield of **21** after 10 minutes (57 mg). 1H NMR (400 MHz, Chloroform-*d*) δ 6.67 (d, *J* = 7.7 Hz, 1H), 6.24 – 6.22 (m, 1H), 5.70 (t, *J* = 1.1 Hz, 1H), 4.85 – 4.77 (m, 1H), 4.22 (q, *J* = 7.1, 6.6 Hz, 2H), 3.79 (s, 3H), 3.40 (s, 2H), 2.99 – 2.86 (m, 2H), 2.06 (s, 3H), 1.29 (t, *J* = 7.2 Hz, 3H). 13C NMR (101 MHz, Chloroform-*d*) δ 170.9, 170.1, 166.5, 136.3, 126.9, 61.9, 52.2, 51.9, 33.6, 33.3, 23.1, 14.2. IR (KBr): 3622, 3294, 2954, 1726, 1655, 1536, 1439, 1332, 1203, 1134, 1028, 954, 815, 588 cm-1. HRMS (ESI) m/z: [M + H]+ Calcd. for: C12H20NO5S 290.1062; Found 290.1072.

**ethyl N-acetyl-S-(2-(benzylcarbamoyl)allyl)-L-cysteinate (22)**

Following the general procedure, the reaction was conducted on a 0.2 mmol scale. **22** was isolated by PTLC (Dichloromethane/methanol = 20/1) as light-yellow solid. In the case of PPh3 was selected as the catalyst, the reaction was completed in 4 h, with an 80% yield of **22** isolated (58 mg). Alternatively, the POL-PPh3 catalyst delivered an 84% yield of **22** after 4.5 h (61 mg). Mp: 107-108 ºC. 1H NMR (400 MHz, Chloroform-*d*) δ 7.36 – 7.25 (m, 5H), 6.83 (t, *J* = 5.7 Hz, 1H), 6.67 (d, *J* = 7.9 Hz, 1H), 5.80 (s, 1H), 5.45 (s, 1H), 4.79 (dt, *J* = 7.9, 5.3 Hz, 1H), 4.52 (d, *J* = 5.8 Hz, 2H), 4.19 (q, *J* = 7.1 Hz, 2H), 3.56 – 3.40 (m, 2H), 3.01 – 2.84 (m, 2H), 1.98 (s, 3H), 1.27 (t, *J* = 7.1 Hz, 3H). 13C NMR (101 MHz, Chloroform-*d*) δ 170.8, 170.3, 167.3, 140.3, 138.2, 128.8, 127.9, 127.6, 121.6, 62.1, 52.1, 43.8, 34.4, 33.9, 23.1, 14.3. IR (KBr): 3735, 3567, 3284, 2987, 1656, 1543, 1276, 1028, 750, 592, 458 cm-1. HRMS (ESI) m/z: [M + H]+ Calcd. for: C18H25N2O4S 365.1535; Found 365.1531.

**ethyl (Z)-N-acetyl-S-(2-propionylpent-2-en-1-yl)-L-cysteinate (23)**

Following the general procedure, the reaction was conducted on a 0.2 mmol scale. **23** was isolated by PTLC (Dichloromethane/methanol = 20/1) as white solid. In the case of POL-PPh3 was selected as the catalyst, the reaction was completed in 30 minutes, with a 95% yield of **23** isolated (60 mg, E/Z > 99/1 as determined by 1H NMR). Mp: 55-57 ºC. 1H NMR (400 MHz, Chloroform-*d*) δ 6.90 (d, *J* = 8.09 Hz, 1H), 6.72 (t, *J* = 7.39 Hz, 1H), 4.94 – 4.81 (m, 1H), 4.21 (q, *J* = 6.98 Hz, 2H), 3.55 – 3.44 (m, 2H), 3.07 – 2.91 (m, 2H), 2.71 (q, *J* = 7.30 Hz, 2H), 2.33 (p, *J* = 7.53 Hz, 2H), 2.11 (s, 3H), 1.28 (t, *J* = 7.14 Hz, 3H), 1.11 (t, *J* = 7.39 Hz, 6H). 13C NMR (101 MHz, Chloroform-*d*) δ 201.3, 170.9, 170.3, 147.2, 137.0, 61.8, 52.5, 35.0, 30.4, 27.2, 23.2, 22.8, 14.2, 13.5, 8.7. IR (KBr): 2926, 2854, 1729, 1670, 1438, 1275, 1199, 1131, 764, 749 cm-1. HRMS (ESI) m/z: [M + H]+ Calcd. for: C15H26NO4S 316.1583; Found 316.1588.

**ethyl N-acetyl-S-(2-cyanoallyl)-L-cysteinate (24)**

Following the general procedure, the reaction was conducted on a 0.2 mmol scale. **24** was isolated by PTLC (Dichloromethane/methanol = 20/1) as light-yellow oil. In the case of POL-PPh3 was selected as the catalyst, the reaction was completed in 20 minutes, with a 92% yield of **24** isolated (47 mg). 1H NMR (400 MHz, Chloroform-*d*) δ 6.40 (d, *J* = 7.28 Hz, 1H), 5.97 (t, *J* = 0.71 Hz, 1H), 5.87 (t, *J* = 1.22 Hz, 1H), 4.86 – 4.73 (m, 1H), 4.26 (q, *J* = 7.12 Hz, 2H), 3.32 (s, 2H), 3.06 – 2.85 (m, 2H), 2.07 (s, 3H), 1.32 (t, *J* = 7.13 Hz, 3H). 13C NMR (101 MHz, Chloroform-*d*) δ 170.5, 170.0, 132.1, 119.8, 117.5, 62.2, 51.7, 35.6, 33.1, 23.1, 14.1. IR (KBr): 2968, 1738, 1661, 1509, 1373, 1275, 1267, 1198, 1031, 764, 750 cm-1. HRMS (ESI) m/z: [M + H]+ Calcd. for: C11H17N2O3S 257.0960; Found 257.0964.

**methyl 2-(((3-ethoxy-3-oxopropyl)thio)methyl)acrylate (25)**

Following the general procedure, the reaction was conducted on a 0.2 mmol scale, **25** was isolated by PTLC (Petroleum ether (bp: 60-90℃)/ethyl acetate = 9/1) as light-yellow oil. In the case of PPh3 was selected as the catalyst, the reaction was completed in 30 minutes, with a 95% yield of **25** isolated (44 mg). Alternatively, in PBS (7.0 pH)/EtOH= 9/1 solvent, the POL-PPh3 catalyst delivered a 98% yield of **25** after 45 minutes (45 mg). 1H NMR (400 MHz, Chloroform-*d*) δ 6.27 – 6.19 (m, 1H), 5.75 – 5.64 (m, 1H), 4.15 (q, *J* = 7.2 Hz, 2H), 3.79 (s, 3H), 3.41 (s, 2H), 2.80 – 2.70 (m, 2H), 2.64 – 2.56 (m, 2H), 1.27 (t, *J* = 7.2 Hz, 3H). 13C NMR (101 MHz, Chloroform-*d*) δ 171.9, 166.6, 136.7, 126.4, 60.8, 52.2, 34.5, 32.8, 26.4, 14.3. IR (KBr): 3747, 3445, 2983, 1730, 1628, 1439, 1331, 1200, 1132, 945, 815, 758, 649 cm-1. HRMS (ESI) m/z: [M + H]+ Calcd. for: C10H17O4S 233.0848; Found 233.0854.

**methyl 2-((benzylthio)methyl)acrylate (26)**

Following the general procedure, the reaction was conducted on a 0.2 mmol scale, **26** was isolated by PTLC (Petroleum ether (bp: 60-90℃)/ethyl acetate = 9/1) as light-yellow oil. In the case of PPh3 was selected as the catalyst, the reaction was completed in 50 minutes, with a 85% yield of **26** isolated (38 mg). 1H NMR (400 MHz, Chloroform-*d*) δ 7.34 – 7.27 (m, 4H), 7.26 – 7.21 (m, 1H), 6.22 (d, *J* = 1.2 Hz, 1H), 5.60 (d, *J* = 1.1 Hz, 1H), 3.78 (s, 3H), 3.66 (s, 2H), 3.27 (d, *J* = 1.1 Hz, 2H). 13C NMR (101 MHz, Chloroform-*d*) δ 166.8, 137.9, 136.6, 129.1, 128.6, 127.2, 126.3, 52.2, 35.7, 32.0. IR (KBr): 3004, 1724, 1629, 1438, 1330, 1261, 1130, 950, 750, 704 cm-1. HRMS (ESI) m/z: [M + H]+ Calcd. for: C12H15O2S 223.0793; Found 223.0799.

**methyl 2-((decylthio)methyl)acrylate (27)**

Following the general procedure, the reaction was conducted on a 0.2 mmol scale, **27** was isolated by PTLC (Petroleum ether (bp: 60-90℃)/ethyl acetate = 10/1) as light-yellow oil. In PBS (7.0 pH)/EtOH= 9/1 solvent, POL-PPh3 catalyst delivered a 74% yield of **27** after 1.5 h (40 mg). 1H NMR (400 MHz, Chloroform-*d*) δ 6.21 (d, *J* = 1.18 Hz, 1H), 5.65 (q, *J* = 1.17 Hz, 1H), 3.79 (s, 3H), 3.38 (d, *J* = 1.08 Hz, 2H), 2.48 – 2.41 (m, 2H), 1.59 – 1.51 (m, 2H), 1.39 – 1.33 (m, 2H), 1.30 – 1.23 (m, 12H), 0.88 (t, *J* = 6.83 Hz, 3H). 13C NMR (101 MHz, Chloroform-*d*) δ 166.8, 137.0, 125.9, 52.2, 32.8, 32.0, 31.6, 29.6, 29.6, 29.4, 29.3, 29.2, 29.0, 22.8, 14.2. IR (KBr): 2924, 2854, 1729, 1631, 1438, 1199, 1178, 1033, 1005, 813, 750 cm-1. HRMS (ESI) m/z: [M + H]+ Calcd. for: C15H29O2S 273.1888; Found 273.1884.

**methyl 2-(((2-(4-methyl-2-oxocyclohexyl)propan-2-yl)thio)methyl)acrylate (28)**

Following the general procedure, the reaction was conducted on a 0.2 mmol scale, **28** was isolated by PTLC (Petroleum ether (bp: 60-90℃)/ethyl acetate = 9/1) as light-yellow oil. In the case of PPh3 was selected as the catalyst, the reaction was completed in 12 h, with a 56% yield of **28** isolated (32 mg). Alternatively, in PBS (7.0 pH)/EtOH= 9/1 solvent, the POL-PPh3 catalyst delivered a 75% yield of **28** after 24 h (43 mg). 1H NMR (400 MHz, Chloroform-*d*) δ 6.25 – 6.20 (m, 1H), 5.83 – 5.78 (m, 1H), 3.79 (d, *J* = 1.4 Hz, 3H), 3.42 (s, 2H), 2.60 – 2.46 (m, 2H), 2.34 – 2.23 (m, 1H), 2.12 – 2.00 (m, 1H), 1.98 – 1.80 (m, 2H), 1.55 (s, 3H), 1.53 – 1.38 (m, 2H), 1.37 (s, 3H), 1.02 (d, *J* = 6.3 Hz, 3H). 13C NMR (101 MHz, Chloroform-*d*) δ 210.9, 166.8, 137.5, 127.0, 57.7, 52.5, 52.2, 48.2, 36.8, 34.6, 29.8, 28.9, 27.8, 23.9, 22.4. IR (KBr): 2953, 2871, 1712, 1631, 1439, 1330, 1275, 1199, 1129, 950, 813, 764,750 cm-1. HRMS (ESI) m/z: [M + H]+ Calcd. for: C15H25O3S 285.1524; Found 285.1519.

**ethyl 2-(((2-hydroxyethyl)thio)methyl)acrylate (29)**

Following the general procedure, the reaction was conducted on a 0.2 mmol scale, **29** was isolated by PTLC (Petroleum ether (bp: 60-90℃)/ethyl acetate = 3/1) as light-yellow oil. In the case of POL-PPh3 was selected as the catalyst, the reaction was completed in 30 minutes, with a 87% yield of **29** isolated (31 mg). 1H NMR (400 MHz, Chloroform-*d*) δ 6.23 (d, *J* = 1.03 Hz, 1H), 5.70 (q, *J* = 1.10 Hz, 1H), 3.80 (s, 3H), 3.75 (t, *J* = 5.89 Hz, 2H), 3.43 (d, *J* = 1.06 Hz, 2H), 2.69 (t, *J* = 5.91 Hz, 2H). 13C NMR (101 MHz, Chloroform-*d*) δ 166.7, 136.7, 126.8, 60.6, 52.3, 34.7, 32.4. IR (KBr): 2951, 1722, 1610, 1525, 1439, 1332, 1274, 1258, 1204, 1122, 765, 750 ,699 cm-1. HRMS (ESI) m/z: [M + H]+ Calcd. for: C7H13O3S 177.0585; Found 177.0579.

**2-((2-(ethoxycarbonyl)allyl)thio)propanoic acid (30)**

Following the general procedure, the reaction was conducted on a 0.2 mmol scale, **30** was isolated by PTLC (Petroleum ether (bp: 60-90℃)/ethyl acetate = 1/1) as light-yellow oil. In the case of POL-PPh3 was selected as the catalyst, the reaction was completed in 1 h, with a 77% yield of **30** isolated (31 mg). 1H NMR (400 MHz, Chloroform-*d*) δ 6.27 (d, *J* = 1.11 Hz, 1H), 5.77 (q, *J* = 1.08 Hz, 1H), 3.80 (s, 3H), 3.62 – 3.51 (m, 2H), 3.34 (q, *J* = 7.18 Hz, 1H), 1.44 (d, *J* = 7.18 Hz, 3H). 13C NMR (101 MHz, Chloroform-*d*)δ 178.9, 166.6, 136.0, 127.3, 52.3, 39.9, 32.7, 16.5. IR (KBr): 2989, 1724, 1439, 1332, 1275, 1260, 1202, 952, 764, 750 cm-1. HRMS (ESI) m/z: [M + H]+ Calcd. for: C8H13O4S 205.0535; Found 205.0527.

**methyl 2-(((2-chlorophenyl)thio)methyl)acrylate (31)**

Following the general procedure, the reaction was conducted on a 0.2 mmol scale, **31** was isolated by PTLC (Petroleum ether (bp: 60-90℃)/ethyl acetate = 9/1) as light-yellow oil. In PBS (7.0 pH)/EtOH= 9/1 solvent, POL-PPh3 catalyst delivered a 68% yield of **31** after 1.5 h (33 mg). 1H NMR (400 MHz, Chloroform-*d*) δ 7.41 – 7.35 (m, 1H), 7.30 – 7.25 (m, 1H), 7.23 – 7.12 (m, 2H), 6.21 (s, 1H), 5.64 (s, 1H), 3.82 (s, 2H), 3.80 (s, 3H). 13C NMR (101 MHz, Chloroform-*d*) δ 166.5, 135.5, 135.0, 134.5, 131.0, 129.9, 127.7, 127.2, 52.3, 34.0. IR (KBr): 3420, 2952, 1723, 1634, 1452, 1330, 1261, 1132, 1035, 952, 814, 749 cm-1. HRMS (ESI) m/z: [M + H]+ Calcd. for: C11H12O2SCl 243.0247; Found 243.0252.

**methyl 2-(((3-chlorophenyl)thio)methyl)acrylate (32)**

Following the general procedure, the reaction was conducted on a 0.2 mmol scale, **32** was isolated by PTLC (Petroleum ether (bp: 60-90℃)/ethyl acetate = 9/1) as light-yellow oil. In the case of PPh3 was selected as the catalyst, the reaction was completed in 1 h, with a 50% yield of **32** isolated (24 mg). Alternatively, in PBS (7.0 pH)/EtOH= 9/1 solvent, the POL-PPh3 catalyst delivered a 77% yield of **32** after 1.5 h (37 mg). 1H NMR (400 MHz, Chloroform-*d*) δ 7.35 – 7.29 (m, 1H), 7.23 – 7.12 (m, 3H), 6.21 (s, 1H), 5.62 (s, 1H), 3.80 (s, 3H), 3.79 (s, 2H). 13C NMR (101 MHz, Chloroform-*d*) δ 166.5, 137.7, 135.8, 134.7, 130.0, 129.9, 128.4, 127.4, 126.9, 52.3, 35.4. IR (KBr): 3726, 3600, 3432, 2951, 1724, 1577, 1438, 1330, 1261, 1132, 951, 765, 680 cm-1. HRMS (ESI) m/z: [M + H]+ Calcd. for: C11H12O2SCl 243.0247; Found 243.0239.

**methyl 2-(((4-fluorophenyl)thio)methyl)acrylate (33)**

Following the general procedure, the reaction was conducted on a 0.2 mmol scale, **33** was isolated by PTLC (Petroleum ether (bp: 60-90℃)/ethyl acetate = 9/1) as light-yellow oil. In the case of PPh3 was selected as the catalyst, the reaction was completed in 1 h, with a 58% yield of **33** isolated (26 mg). Alternatively, in PBS (7.0 pH)/EtOH= 9/1 solvent, the POL-PPh3 catalyst delivered a 91% yield of **33** after 1.5 h (41 mg). 1H NMR (400 MHz, Chloroform-*d*) δ 7.42 – 7.30 (m, 2H), 7.05 – 6.94 (m, 2H), 6.11 (d, *J* = 1.0 Hz, 1H), 5.39 (d, *J* = 1.0 Hz, 1H), 3.79 (s, 3H), 3.69 (d, *J* = 1.1 Hz, 2H). 13C NMR (101 MHz, Chloroform-*d*) δ 166.6, 162.4 (d, *J* = 247.2 Hz), 136.2, 134.5, 134.5, 130.1 (d, *J* = 3.3 Hz), 126.9, 116.2, 116.0, 52.3, 37.3. 19F NMR (376 MHz, Chloroform-*d*) δ -114.06. IR (KBr): 3726, 3432, 2952, 1725, 1589, 1491, 1438, 1330, 1200, 950, 750, 623, 516 cm-1. HRMS (ESI) m/z: [M + H]+ Calcd. for: C11H12O2SF 227.0542; Found 227.0547.

**methyl 2-(((4-bromophenyl)thio)methyl)acrylate (34)**

Following the general procedure, the reaction was conducted on a 0.2 mmol scale, **34** was isolated by PTLC (Petroleum ether (bp: 60-90℃)/ethyl acetate = 9/1) as light-yellow oil. In PBS (7.0 pH)/EtOH= 9/1 solvent, POL-PPh3 catalyst delivered a 87% yield of **34** after 1.5 h (50 mg). 1H NMR (400 MHz, Chloroform-*d*) δ 7.38 (d, *J* = 8.5 Hz, 2H), 7.19 (d, *J* = 8.4 Hz, 2H), 6.15 (s, 1H), 5.52 (s, 1H), 3.77 (s, 3H), 3.72 (s, 2H). 13C NMR (101 MHz, Chloroform-*d*) δ 166.5, 135.9, 134.6, 132.6, 132.1, 127.2, 121.0, 52.3, 35.9. IR (KBr): 3648, 3005, 1716, 1399, 1275, 1261, 1210, 1154, 764, 750 cm-1. HRMS (ESI) m/z: [M + H]+ Calcd. for: C11H12O2SBr 286.9741; Found 286.9738.

**methyl 2-((thiophen-2-ylthio)methyl)acrylate (35)**

Following the general procedure, the reaction was conducted on a 0.2 mmol scale, **35** was isolated by PTLC (Petroleum ether (bp: 60-90℃)/ethyl acetate = 9/1) as light-yellow oil. In the case of PPh3 was selected as the catalyst, the reaction was completed in 1 h, with a 66% yield of **35** isolated (28 mg). Alternatively, in PBS (7.0 pH)/EtOH= 9/1 solvent, the POL-PPh3 catalyst delivered a 74% yield of **35** after 1 h (35 mg). 1H NMR (400 MHz, Chloroform-*d*) δ 7.36 (dd, *J* = 5.4, 1.2 Hz, 1H), 7.08 (dd, *J* = 3.6, 1.3 Hz, 1H), 6.97 (dd, *J* = 5.3, 3.6 Hz, 1H), 6.11 (d, *J* = 1.1 Hz, 1H), 5.28 (q, *J* = 1.0 Hz, 1H), 3.80 (s, 3H), 3.60 (d, *J* = 0.9 Hz, 2H). 13C NMR (101 MHz, Chloroform-*d*) δ 166.3, 136.0, 135.3, 133.3, 130.3, 127.6, 127.1, 52.2, 40.5. IR (KBr): 3431, 3104, 2950, 2853, 1724, 1629, 1438, 1308, 1200, 1131, 946, 830, 704, 491 cm-1. HRMS (ESI) m/z: [M + H]+ Calcd. for: C9H11O2S2 215.0200; Found 215.0205.

**dimethyl 2,2'-((propane-1,3-diylbis(sulfanediyl))bis(methylene))diacrylate (36)**

Following the general procedure, the reaction was conducted on a 0.2 mmol scale, **36** was isolated by PTLC (Petroleum ether (bp: 60-90℃)/ethyl acetate = 9/1) as light-yellow oil. In the case of PPh3 was selected as the catalyst, the reaction was completed in 1 h, with a 98% yield of **36** isolated (60 mg). Alternatively, in PBS (7.0 pH)/EtOH= 9/1 solvent, the POL-PPh3 catalyst delivered a 99% yield of **36** after 1 h (60 mg). 1H NMR (400 MHz, Chloroform-*d*) δ 6.24 – 6.18 (m, 2H), 5.70 – 5.63 (m, 2H), 3.79 (s, 6H), 3.38 (d, *J* = 1.1 Hz, 4H), 2.61 – 2.49 (m, 4H), 1.91 – 1.76 (m, 2H). 13C NMR (101 MHz, Chloroform-*d*) δ 166.7, 136.8, 126.2, 52.2, 32.8, 30.4, 28.6. IR (KBr): 3431, 2951, 1724, 1629, 1438, 1275, 1126, 943, 813, 750, 588 cm-1. HRMS (ESI) m/z: [M + H]+ Calcd. for: C13H21O4S2 305.0881; Found 305.0886.

**methyl 2-((((2R)-2-(2-acetamidopropanamido)-3-methoxy-3-oxopropyl)thio)methyl)acrylat(37)**

Following the general procedure, the reaction was conducted on a 0.2 mmol scale, **37** was isolated by PTLC (Dichloromethane/methanol = 20/1) as white solid. In the case of PPh3 was selected as the catalyst, the reaction was completed in 10 minutes, with a 95% yield of **37** isolated (66 mg). Alternatively, the POL-PPh3 catalyst delivered a 96% yield of **37** after 30 minutes (66 mg). Mp: 69-71 ºC. 1H NMR (400 MHz, Chloroform-*d*) δ 7.47 (d, *J* = 7.9 Hz, 1H), 6.68 (d, *J* = 7.6 Hz, 1H), 6.23 (d, *J* = 1.1 Hz, 1H), 5.71 (d, *J* = 1.1 Hz, 1H), 4.84 – 4.75 (m, 1H), 4.73 – 4.58 (m, 1H), 3.79 (s, 3H), 3.77 (s, 3H), 3.41 (s, 2H), 2.97 – 2.86 (m, 2H), 2.02 (s, 3H), 1.40 (d, *J* = 7.0 Hz, 3H). 13C NMR (101 MHz, Chloroform-*d*) δ 172.7, 171.0, 170.2, 166.7, 136.2, 127.2, 52.8, 52.3, 52.1, 48.8, 33.3, 23.2, 18.5. IR (KBr): 3294, 2955, 1725, 1653, 1535, 1438, 1310, 1206, 1133, 1019, 751 cm-1. HRMS (ESI) m/z: [M + H]+ Calcd. for: C14H23N2O6S 347.1277; Found 347.1280.

**methyl 2-((((2R)-2-(2-acetamido-3-phenylpropanamido)-3-methoxy-3-oxopropyl)thio)methyl)acrylate (38)**

Following the general procedure, the reaction was conducted on a 0.2 mmol scale, **38** was isolated by PTLC (Dichloromethane/methanol = 20/1) as a light-yellow solid. In the case of PPh3 was selected as the catalyst, the reaction was completed in 1 h, with a 99% yield of **38** isolated (84 mg). Alternatively, the POL-PPh3 catalyst delivered a 91% yield of **38** after 1 h (77 mg). Mp: 111-113 ºC. 1H NMR (400 MHz, Chloroform-*d*) δ 7.31 – 7.24 (m, 3H), 7.23 – 7.18 (m, 3H), 6.67 (d, *J* = 7.9 Hz, 1H), 6.20 (d, *J* = 1.0 Hz, 1H), 5.67 (d, *J* = 1.1 Hz, 1H), 4.86 (dt, *J* = 8.1, 6.8 Hz, 1H), 4.76 (dt, *J* = 7.8, 5.4 Hz, 1H), 3.77 (s, 3H), 3.72 (s, 3H), 3.39 – 3.29 (m, 2H), 3.17 – 3.01 (m, 2H), 2.86 (d, *J* = 5.4 Hz, 2H), 1.96 (s, 3H). 13C NMR (101 MHz, Chloroform-*d*) δ 171.3, 170.7, 170.4, 166.6, 136.6, 136.2, 129.5, 128.6, 127.2, 127.0, 54.2, 52.7, 52.3, 52.2, 38.3, 33.3, 33.3, 23.1. IR (KBr): 3283, 2953, 1726, 1649, 1543, 1438, 1331, 1260, 1203, 1133, 1032, 815, 750, 700, 589 cm-1. HRMS (ESI) m/z: [M + H]+ Calcd. for: C20H27N2O6S 423.1590; Found 423.1583.

**methyl 2-((((2R)-2-(2-acetamido-4-(methylthio)butanamido)-3-methoxy-3-oxopropyl)thio)methyl)acrylate (39)**

Following the general procedure, the reaction was conducted on a 0.2 mmol scale, **39** was isolated by PTLC (Dichloromethane/methanol = 20/1) as a light-yellow solid. In the case of PPh3 was selected as the catalyst, the reaction was completed in 30 minutes, with a 96% yield of **39** isolated (78 mg). Alternatively, the POL-PPh3 catalyst delivered a 96% yield of **39** after 1 h (78 mg). Mp: 66-68 ºC. 1H NMR (400 MHz, Chloroform-*d*) δ 7.36 (d, *J* = 7.9 Hz, 1H), 6.61 – 6.51 (m, 1H), 6.23 (d, *J* = 1.0 Hz, 1H), 5.71 (d, *J* = 1.0 Hz, 1H), 4.80 (dt, *J* = 7.9, 5.3 Hz, 1H), 4.73 (dt, *J* = 8.0, 6.7 Hz, 1H), 3.80 (s, 3H), 3.77 (s, 3H), 3.41 (t, *J* = 1.2 Hz, 2H), 2.99 – 2.88 (m, 2H), 2.66 – 2.57 (m, 2H), 2.13 (s, 3H), 2.10 – 2.06 (m, 1H), 2.03 (s, 3H), 2.02 – 1.95 (m, 1H). 13C NMR (101 MHz, Chloroform-*d*) δ 171.4, 170.8, 170.3, 166.7, 136.3, 127.2, 52.8, 52.4, 52.1, 33.4, 31.8, 30.0, 23.3, 15.4, 15.3. IR (KBr): 3294, 2955, 1725, 1650, 1536, 1438, 1332, 1260, 1205, 1134, 1017, 813, 750 cm-1. HRMS (ESI) m/z: [M + H]+ Calcd. for: C16H27N2O6S2 407.1311; Found 407.1303.

**methyl (R)-2-(((2-(2-acetamidoacetamido)-3-methoxy-3-oxopropyl)thio)methyl)acrylate (40)**

Following the general procedure, the reaction was conducted on a 0.2 mmol scale, **40** was isolated by PTLC (Dichloromethane/methanol = 20/1) as colorless oil. In the case of PPh3 was selected as the catalyst, the reaction was completed in 1 h, with a 96% yield of **40** isolated (89 mg). Alternatively, the POL-PPh3 catalyst delivered a 95% yield of **40** after 1 h (88 mg). 1H NMR (400 MHz, Chloroform-*d*) δ 8.66 (s, 1H), 7.52 (d, *J* = 7.8 Hz, 1H), 7.32 (d, *J* = 8.1 Hz, 1H), 7.28 – 7.20 (m, 1H), 7.18 – 7.07 (m, 2H), 6.98 (d, *J* = 2.4 Hz, 1H), 6.74 – 6.65 (m, 1H), 6.17 (s, 1H), 5.74 (s, 1H), 4.91 – 4.85 (m, 1H), 4.69 – 4.61 (m, 1H), 3.67 (q, 6H), 3.34 (d, *J* = 2.9 Hz, 2H), 3.31 (d, *J* = 5.4 Hz, 2H), 2.80 – 2.62 (m, 2H), 1.86 (s, 3H). 13C NMR (101 MHz, Chloroform-*d*) δ 171.9, 170.5, 170.4, 166.8, 136.2, 136.1, 127.5, 127.4, 123.4, 122.1, 119.5, 118.4, 111.5, 109.3, 53.2, 52.5, 52.2, 52.1, 33.5, 32.6, 27.3, 22.9. IR (KBr): 3394, 2952, 1725, 1652, 1529, 1438, 1333, 1275, 1260, 1205, 913, 747 cm-1. HRMS (ESI) m/z: [M + H]+ Calcd. for: C22H28N3O6S 462.1699; Found 462.1691.

**N5-((R)-1-((carboxymethyl)amino)-3-((2-(methoxycarbonyl)allyl)thio)-1-oxopropan-2-yl)glutamine (41)**

Following the general procedure, the reaction was conducted on a 0.2 mmol scale, **41** was isolated by PTLC (tBuOH/AcOH/H2O = 3/1/1) as light-yellow solid. In the case of PPh3 was selected as the catalyst, the reaction was completed in 30 minutes, with a 84% yield of **41** isolated (68 mg). Alternatively, the POL-PPh3 catalyst delivered a 85% yield of **41** after 1 h (69 mg). Mp: 180-182 ºC. 1H NMR (400 MHz, D2O) δ 6.07 (s, 1H), 5.65 (s, 1H), 4.37 (dd, *J* = 8.8, 5.0 Hz, 1H), 3.59 (s, 3H), 3.56 (d, *J* = 7.3 Hz, 3H), 3.25 (s, 2H), 2.81 (dd, *J* = 14.2, 5.0 Hz, 1H), 2.62 (dd, *J* = 14.2, 8.8 Hz, 1H), 2.33 (td, *J* = 7.5, 3.6 Hz, 2H), 1.96 (q, *J* = 7.5 Hz, 2H). 13C NMR (101 MHz, D2O) δ 176.2, 174.8, 171.8, 168.5, 135.7, 128.3, 54.0, 52.9, 52.5, 43.3, 32.3, 31.3, 26.2. IR (KBr): 3268, 2952, 1722, 1645, 1543, 1397, 1204, 1135 cm-1. HRMS (ESI) m/z: [M + H]+ Calcd. for: C15H24N3O8S 406.1284; Found 406.1275.

**(2R,3R,4S,6S)-2-(acetoxymethyl)-6-((2-(methoxycarbonyl)allyl)thio)tetrahydro-2H-pyran-3,4,5-triyl triacetate (42)**

Following the general procedure, the reaction was conducted on a 0.2 mmol scale, **42** was isolated by PTLC (Dichloromethane/methanol = 20/1) as light-yellow oil. In the case of PPh3 was selected as the catalyst, the reaction was completed in 10 minutes, with a 88% yield of **42** isolated (81 mg). Alternatively, in PBS (7.0 pH)/EtOH= 9/1 solvent, the POL-PPh3 catalyst delivered a 98% yield of **42** after 30 minutes (91 mg). 1H NMR (400 MHz, Chloroform-*d*) δ 6.27 (d, *J* = 1.1 Hz, 1H), 5.73 (t, *J* = 1.1 Hz, 1H), 5.27 – 5.18 (m, 1H), 5.11 – 5.00 (m, 2H), 4.55 – 4.47 (m, 1H), 4.24 (dd, *J* = 12.4, 5.0 Hz, 1H), 4.13 (dd, *J* = 12.4, 2.3 Hz, 1H), 3.79 (s, 3H), 3.70 – 3.65 (m, 1H), 3.61 – 3.52 (m, 2H), 2.09 (s, 3H), 2.03 (d, *J* = 1.9 Hz, 6H), 2.01 (s, 3H). 13C NMR (101 MHz, Chloroform-*d*) δ 170.7, 170.3, 169.5, 169.5, 166.3, 136.6, 127.2, 82.7, 75.8, 73.9, 69.9, 68.3, 62.2, 52.3, 30.9, 20.8, 20.7, 20.7, 20.7. IR (KBr): 3258, 2952, 1722, 1645, 1540, 1397, 1205, 1135, 750 cm-1. HRMS (ESI) m/z: [M + H]+ Calcd. for: C19H27O11S 463.1274; Found 463.1277.

**((S)-3-((2-(methoxycarbonyl)allyl)thio)-2-methylpropanoyl)-L-proline (43)**

Following the general procedure, the reaction was conducted on a 0.2 mmol scale, **43** was isolated by PTLC (Dichloromethane/methanol = 4/1) as light-yellow oil. In the case of PPh3 was selected as the catalyst, the reaction was completed in 2 h, with a 77% yield of **43** isolated (49 mg). Alternatively, the POL-PPh3 catalyst delivered a 77% yield of **43** after 3 h (49 mg). 1H NMR (400 MHz, Chloroform-*d*) δ 6.19 (d, *J* = 1.2 Hz, 1H), 5.70 (d, *J* = 1.2 Hz, 1H), 4.28 – 4.17 (m, 1H), 3.77 (s, 3H), 3.65 – 3.49 (m, 2H), 3.34 (d, *J* = 1.0 Hz, 2H), 2.83 – 2.65 (m, 2H), 2.44 – 2.34 (m, 1H), 2.02 (d, *J* = 5.6 Hz, 3H), 1.86 – 1.74 (m, 1H), 1.14 (d, *J* = 5.8 Hz, 3H). 13C NMR (101 MHz, Chloroform-*d*) δ 179.1, 174.3, 166.7, 136.9, 126.4, 62.2, 52.2, 47.7, 38.5, 35.3, 33.4, 29.6, 25.0, 17.1. IR (KBr): 3747, 3421, 2973, 1722, 1603, 1445, 1398, 1331, 1201, 1134, 994, 755 cm-1. HRMS (ESI) m/z: [M + H]+ Calcd. for: C14H22NO5S 316.1219; Found 316.1221.

**methyl (S)-2-acetamido-3-((2-(methoxycarbonyl)allyl)thio)-3-methylbutanoate (44)**

Following the general procedure, the reaction was conducted on a 0.2 mmol scale,and **44** was isolated by PTLC (Dichloromethane/methanol = 20/1) as a colorless oil. In the case of POL-PPh3 was selected as the catalyst, the reaction was completed in 30 minutes, with a 95% yield of **44** isolated (58 mg). 1H NMR (400 MHz, Chloroform-*d*) δ 6.57 (d, *J* = 8.62 Hz, 1H), 6.25 (d, *J* = 0.99 Hz, 1H), 5.81 (q, *J* = 1.10 Hz, 1H), 4.63 (d, *J* = 8.65 Hz, 1H), 3.80 (s, 3H), 3.75 (s, 3H), 3.49 (d, *J* = 1.09 Hz, 2H), 2.08 (s, 3H), 1.40 (d, *J* = 1.62 Hz, 6H). 13C NMR (101 MHz, Chloroform-*d*) δ 171.0, 170.2, 166.6, 136.7, 127.9, 59.3, 52.3, 52.3, 48.2, 29.5, 27.1, 26.1, 23.2. IR (KBr): 2950, 2973, 2844, 2245, 1723, 1658, 1438, 1258, 1122, 765, 749 cm-1. HRMS (ESI) m/z: [M + H]+ Calcd. for: C13H22NO5S 304.1219; Found 304.1213.

**ethyl 2-(((1-((2-methoxy-2-oxoethyl)amino)-1-oxopropan-2-yl)thio)methyl)acrylate (45)**

Following the general procedure, the reaction was conducted on a 0.2 mmol scale, **45** was isolated by PTLC (Dichloromethane/methanol = 20/1) as a colorless oil. In the case of POL-PPh3 was selected as the catalyst, the reaction was completed in 30 minutes, with a 95% yield of **45** isolated (52 mg). 1H NMR (400 MHz, Chloroform-*d*) δ 7.30 (d, *J* = 8.50 Hz, 1H), 6.24 (t, *J* = 1.27 Hz, 1H), 5.73 (p, *J* = 1.18 Hz, 1H), 4.16 – 3.96 (m, 2H), 3.79 (s, 3H), 3.77 (s, 3H), 3.50 (q, *J* = 1.04 Hz, 2H), 3.42 (q, *J* = 7.36 Hz, 1H), 1.47 (d, *J* = 7.33 Hz, 3H). 13C NMR (101 MHz, Chloroform-*d*)δ 172.9, 170.3, 166.6, 136.0, 127.8, 52.4, 52.3, 43.8, 41.4, 32.7, 18.2. IR (KBr): 2953, 1724, 1667, 1491, 1439, 1275, 1260, 1202, 1139, 1134, 764, 750 cm-1. HRMS (ESI) m/z: [M + H]+ Calcd. for: C11H18NO5S 276.0906; Found 276.0910.

**methyl 2-(((1-methyl-1H-imidazol-2-yl)thio)methyl)acrylate (46)**

Following the general procedure, the reaction was conducted on a 0.2 mmol scale, **46** was isolated by PTLC (Petroleum ether (bp: 60-90 oC)/ethyl acetate = 2/1) as white solid. In the case of POL-PPh3 was selected as the catalyst, the reaction was completed in 3 h, with a 70% yield of **46** isolated (30 mg). Mp: 97-99 ºC. 1H NMR (400 MHz, Chloroform-*d*) δ 6.85 – 6.82 (m, 1H), 6.69 (d, *J* = 2.40 Hz, 1H), 6.44 – 6.39 (m, 1H), 5.93 – 5.88 (m, 1H), 4.94 – 4.90 (m, 2H), 3.78 (s, 3H), 3.62 (d, *J* = 1.08 Hz, 3H). 13C NMR (101 MHz, Chloroform-*d*) δ 166.2, 163.0, 134.1, 129.8, 117.8, 117.5, 52.3, 48.0, 35.3. IR (KBr): 3743, 3648, 1715, 1458, 1399, 1275, 1261, 1210, 764, 750 cm-1. HRMS (ESI) m/z: [M + H]+ Calcd. for: C9H13N2O2S 213.0698; Found 213.0701.

**methyl 2-(((3-(((S)-1-(((14S,16S,32S,33S,2R,4S,10E,12E,14R)-86-chloro-14-hydroxy-85,14-dimethoxy-33,2,7,10-tetramethyl-12,6-dioxo-7-aza-1(6,4)-oxazinana-3(2,3)-oxirana-8(1,3)-benzenacyclotetradecaphane-10,12-dien-4-yl)oxy)-1-oxopropan-2-yl)(methyl)amino)-3-oxopropyl)thio)methyl)acrylate (47)**

Following the general procedure, the reaction was conducted on a 0.2 mmol scale, **47** was isolated by PTLC (Dichloromethane/methanol = 20/1) as white solid. In PBS (7.0 pH)/MeCN = 9/1 solvent, the case of PPh3 was selected as the catalyst, the reaction was completed in 30 minutes, with a 90% yield of **47** isolated (150 mg). Alternatively, in PBS (7.0 pH)/MeCN = 9/1 solvent, the POL-PPh3 catalyst delivered a 94% yield of **47** after 30 minutes (157 mg). Mp: 132-134 ºC. 1H NMR (400 MHz, Chloroform-*d*) δ 6.85 (d, *J* = 1.8 Hz, 1H), 6.73 (d, *J* = 11.0 Hz, 1H), 6.63 (d, *J* = 1.7 Hz, 1H), 6.50 – 6.40 (m, 2H), 6.10 (d, *J* = 1.1 Hz, 1H), 5.67 (dd, *J* = 15.3, 9.0 Hz, 1H), 5.58 (d, *J* = 1.3 Hz, 1H), 5.42 (q, *J* = 6.8 Hz, 1H), 4.81 – 4.71 (m, 1H), 4.34 – 4.23 (m, 1H), 4.00 (s, 4H), 3.74 (s, 3H), 3.65 (d, *J* = 12.7 Hz, 1H), 3.51 (d, *J* = 9.0 Hz, 1H), 3.36 (s, 3H), 3.32 (d, *J* = 1.0 Hz, 2H), 3.20 (s, 3H), 3.12 (d, *J* = 12.6 Hz, 1H), 3.03 (d, *J* = 9.7 Hz, 1H), 2.83 (s, 3H), 2.81 – 2.72 (m, 1H), 2.71 – 2.53 (m, 3H), 2.54 – 2.44 (m, 1H), 2.21 – 2.13 (m, 1H), 1.65 (s, 3H), 1.58 – 1.44 (m, 2H), 1.35 – 1.25 (m, 7H), 0.81 (s, 3H). 13C NMR (101 MHz, Chloroform-*d*) δ 170.9, 170.8, 168.8, 166.5, 156.0, 152.4, 142.1, 141.2, 139.2, 136.5, 133.3, 127.8, 126.2, 125.4, 122.1, 118.6, 113.2, 88.6, 80.8, 78.2, 74.1, 67.3, 60.0, 56.7, 56.6, 52.3, 52.2, 46.6, 38.8, 36.3, 35.5, 33.8, 33.2, 32.4, 30.7, 26.7, 15.5, 14.6, 13.4, 12.1. IR (KBr): 3420, 2937, 1716, 1658, 1579, 1455, 1276, 1260, 1082, 980, 750, 579 cm-1. HRMS (ESI) m/z: [M + H]+ Calcd. for: C40H55N3O12SCl 836.3195; Found 836.3192.

**dimethyl 2,2'-(((3-hydroxypropane-1,2-diyl)bis(sulfanediyl))bis(methylene))diacrylate (48)**

Following the general procedure, the reaction was conducted on a 0.2 mmol scale, **48** was isolated by PTLC (Petroleum ether (bp: 60-90 oC)/ethyl acetate = 3/1) as a colorless oil. In PBS (7.0 pH)/EtOH= 9/1 solvent, the POL-PPh3 catalyst delivered a 81% yield of **48** after 1 h (52 mg). 1H NMR (400 MHz, Chloroform-*d*) δ 6.23 (d, *J* = 1.0 Hz, 1H), 6.22 (d, *J* = 1.1 Hz, 1H), 5.76 (d, *J* = 1.1 Hz, 1H), 5.70 (d, *J* = 1.1 Hz, 1H), 3.86 – 3.80 (m, 1H), 3.80 (s, 3H), 3.79 (s, 3H), 3.77 – 3.70 (m, 1H), 3.48 (dd, *J* = 2.8, 1.1 Hz, 2H), 3.43 (d, *J* = 1.0 Hz, 2H), 2.96 – 2.87 (m, 1H), 2.79 – 2.63 (m, 2H).13C NMR (101 MHz, Chloroform-*d*) δ 166.7, 166.6, 137.0, 136.7, 127.0, 126.6, 63.2, 52.3, 52.3, 48.2, 33.7, 33.6, 32.1. IR (KBr): 3747, 3648, 2952, 1723, 1438, 1275, 1260, 1203, 1124, 764, 750 cm-1. HRMS (ESI) m/z: [M + H]+ Calcd. for: C13H21NO5S2 321.0830; Found 321.0834.

**methyl (Z)-2-((((R)-2-acetamido-3-ethoxy-3-oxopropyl)thio)methyl)-5,9-dimethyldeca-2,8-dienoate (49)**

Following the general procedure, the reaction was conducted on a 0.2 mmol scale. **49** was isolated by PTLC (Dichloromethane/methanol = 20/1) as light-yellow oil. In the case of PPh3 was selected as the catalyst, the reaction was completed in 1.5 h, with a 81% yield of **49** isolated (67 mg, E/Z = 99/1 as determined by 1H NMR). Alternatively, the POL-PPh3 catalyst delivered a 92% yield of **49** after 2.5 h (76 mg, E/Z = 87/13 as determined by 1H NMR). 1H NMR (400 MHz, Chloroform-*d*) δ 6.89 (t, *J* = 7.6 Hz, 1H), 6.74 (d, *J* = 6.0 Hz, 1H), 5.12 – 5.05 (m, 1H), 4.91 – 4.84 (m, 1H), 4.26 – 4.17 (m, 2H), 3.78 (s, 3H), 3.56 – 3.44 (m, 2H), 3.06 – 2.94 (m, 2H), 2.29 – 2.20 (m, 1H), 2.15 – 2.09 (m, 1H), 2.08 (s, 3H), 2.05 – 1.94 (m, 2H), 1.69 (s, 3H), 1.67 – 1.61 (m, 1H), 1.60 (s, 3H), 1.42 – 1.32 (m, 1H), 1.29 (t, *J* = 7.1 Hz, 3H), 1.25 – 1.14 (m, 1H), 0.95 – 0.88 (m, 3H). 13C NMR (101 MHz, Chloroform-*d*) δ 170.8, 170.2, 167.4, 145.2, 131.7, 129.1, 124.4, 61.9, 52.3, 52.2, 36.9 (d, *J* = 6.1 Hz), 36.2, 34.8, 32.7, 28.6, 25.8, 25.6, 23.2, 19.7 (d, *J* = 5.4 Hz), 17.8, 14.2. IR (KBr): 3735, 3648, 3566, 3363, 2956, 1716, 1660, 1542, 1374, 1275, 1195, 1029, 750 cm-1. HRMS (ESI) m/z: [M + H]+ Calcd. for: C21H36NO5S 414.2314; Found 414.2307.

**(1R,2S,5R)-2-isopropyl-5-methylcyclohexyl (Z)-2-((((R)-2-acetamido-3-ethoxy-3-oxopropyl)thio)methyl)-3-(2,4-dichlorophenyl)acrylate (50)**

Following the general procedure, the reaction was conducted on a 0.2 mmol scale. **50** was isolated by PTLC (Dichloromethane/methanol = 20/1) as a light-yellow oil. In PBS (7.0 pH)/MeCN = 8/2 solvent, the case of PPh3 was selected as the catalyst, the reaction was completed in 4 h, with a 94% yield of **50** isolated (105 mg, E/Z > 98/2 as determined by 1H NMR). Alternatively, in PBS (7.0 pH)/EtOH = 8/2 solvent, the POL-PPh3 catalyst delivered a 99% yield of **50** after 6 h (110 mg, E/Z = 91/9 as determined by 1H NMR). 1H NMR (400 MHz, Chloroform-*d*) δ 7.72 (s, 1H), 7.51 (d, *J* = 8.4 Hz, 1H), 7.46 (d, *J* = 1.9 Hz, 1H), 7.35 (dd, *J* = 8.3, 2.1 Hz, 1H), 6.80 (d, *J* = 8.0 Hz, 1H), 4.93 – 4.77 (m, 2H), 4.20 (q, *J* = 7.1 Hz, 2H), 3.61 – 3.49 (m, 2H), 3.09 – 2.96 (m, 2H), 2.13 – 2.07 (m, 1H), 2.05 (s, 3H), 1.96 (pd, *J* = 6.9, 2.6 Hz, 1H), 1.73 (d, *J* = 11.6 Hz, 2H), 1.59 – 1.47 (m, 2H), 1.34 – 1.25 (m, 4H), 1.15 – 1.05 (m, 2H), 0.94 (t, *J* = 7.1 Hz, 6H), 0.82 (d, *J* = 6.9 Hz, 3H). 13C NMR (101 MHz, Chloroform-*d*) δ 170.6, 170.1, 166.3, 136.3, 135.5, 135.1, 131.9, 131.6, 131.1, 129.7, 127.4, 75.8, 61.9, 52.4, 47.2, 40.8, 35.4, 34.3, 31.5, 30.1, 26.6, 23.7, 23.1, 22.1, 20.8, 16.6, 14.2. IR (KBr): 3648, 3566, 3291, 2956, 2870, 1714, 1539, 1469, 1373, 1275, 1102, 963, 765 cm-1. HRMS (ESI) m/z: [M + H]+ Calcd. for: C27H38NO5SCl2 558.1848; Found 558.1838.

**((3aR,5R,5aS,8aS,8bR)-2,2,7,7-tetramethyltetrahydro-5H-bis([1,3]dioxolo)[4,5-b:4',5'-d]pyran-5-yl)methyl (Z)-2-((((R)-2-acetamido-3-ethoxy-3-oxopropyl)thio)methyl)-3-(2,4-dichlorophenyl)acrylate (51)**

Following the general procedure, the reaction was conducted on a 0.2 mmol scale. **51** was isolated by PTLC (Dichloromethane/methanol = 20/1) as light-yellow oil. In PBS (7.0 pH)/MeCN = 8/2 solvent, the case of PPh3 was selected as the catalyst, the reaction was completed in 1 h, with a 93% yield of **51** isolated (123 mg, E/Z = 96/4 as determined by 1H NMR). Alternatively, in PBS (7.0 pH)/EtOH = 8/2 solvent, the POL-PPh3 catalyst delivered a 99% yield of **51** after 2 h (131 mg, E/Z = 94/6 as determined by 1H NMR). 1H NMR (400 MHz, Chloroform-*d*) δ 7.80 (s, 1H), 7.51 (d, *J* = 8.4 Hz, 1H), 7.46 (d, *J* = 2.0 Hz, 1H), 7.35 (dd, *J* = 8.4, 2.1 Hz, 1H), 6.79 (d, *J* = 8.0 Hz, 1H), 5.56 (d, *J* = 4.9 Hz, 1H), 4.81 (dt, *J* = 8.0, 4.9 Hz, 1H), 4.66 (dd, *J* = 7.9, 2.5 Hz, 1H), 4.49 – 4.30 (m, 4H), 4.23 – 4.12 (m, 3H), 3.60 – 3.49 (m, 2H), 3.13 – 2.97 (m, 2H), 2.05 (s, 3H), 1.53 (s, 3H), 1.48 (s, 3H), 1.37 (s, 3H), 1.34 (s, 3H), 1.27 (t, *J* = 7.1 Hz, 3H). 13C NMR (101 MHz, Chloroform-*d*) δ 170.7, 170.2, 166.5, 137.6, 135.7, 135.2, 131.7, 131.1, 130.7, 129.8, 127.5, 109.8, 109.0, 96.3, 71.2, 70.7, 70.5, 66.2, 64.6, 61.9, 52.4, 35.4, 30.0, 26.2, 26.1, 25.1, 24.5, 23.1, 14.2. IR (KBr): 3426, 2951, 1724, 1629, 1438, 1330, 1275, 1200, 1130, 944, 813, 751 cm-1. HRMS (ESI) m/z: [M + H]+ Calcd. for: C29H38NO10SCl2 662.1593; Found 662.1600.

**(R)-2,5,7,8-tetramethyl-2-((4S,8S)-4,8,11-trimethyldodecyl)chroman-6-yl 2-((((R)-2-acetamido-3-ethoxy-3-oxopropyl)thio)methyl)acrylate (52)**

Following the general procedure, the reaction was conducted on a 0.2 mmol scale, **52** was isolated by PTLC (Dichloromethane/methanol = 20/1) as light-yellow oil. In PBS (7.0 pH)/MeCN = 8/2 solvent, the case of PPh3 was selected as the catalyst, the reaction was completed in 30 minutes, with a 98% yield of **52** isolated (132 mg). Alternatively, in PBS (7.0 pH)/EtOH = 8/2 solvent, the POL-PPh3 catalyst delivered a 95% yield of **52** after 1.5 h (128 mg). 1H NMR (400 MHz, Chloroform-*d*) δ 6.46 (d, *J* = 1.0 Hz, 1H), 6.44 (d, *J* = 7.8 Hz, 1H), 5.82 (d, *J* = 1.0 Hz, 1H), 4.84 (dt, *J* = 7.6, 5.0 Hz, 1H), 4.30 – 4.16 (m, 2H), 3.53 (s, 2H), 3.08 – 2.94 (m, 2H), 2.59 (t, *J* = 6.8 Hz, 2H), 2.10 (s, 3H), 2.04 (s, 3H), 2.03 (s, 3H), 1.99 (s, 3H), 1.87 – 1.73 (m, 2H), 1.60 – 1.46 (m, 4H), 1.30 (t, *J* = 7.1 Hz, 6H), 1.24 (d, *J* = 7.6 Hz, 7H), 1.18 – 1.01 (m, 8H), 0.87 – 0.83 (m, 12H). 13C NMR (101 MHz, Chloroform-*d*) δ 170.8, 170.0, 164.8, 149.6, 140.5, 136.3, 127.6, 126.8, 125.1, 123.2, 117.6, 75.2, 62.1, 52.1, 40.5, 39.5, 37.5, 37.4, 33.8, 33.7, 32.9, 31.3, 31.1, 28.1, 24.9, 24.5, 23.7, 23.3, 22.8, 22.8, 21.1, 20.7, 19.9, 19.8, 14.3, 13.2, 12.3, 11.9. IR (KBr): 3420, 2927, 1730, 1660, 1574, 1455, 1338, 1276, 1180, 1107, 946, 750, 656 cm-1. HRMS (ESI) m/z: [M + H]+ Calcd. for: C39H64NO6S 674.4454; Found 674.4449.

**(3S,8S,9S,10R,13R,14S,17R)-10,13-dimethyl-17-((R)-6-methylheptan-2-yl)-2,3,4,7,8,9,10,11,12,13,14,15,16,17-tetradecahydro-1H-cyclopenta[a]phenanthren-3-yl (Z)-2-((((R)-2-acetamido-3-ethoxy-3-oxopropyl)thio)methyl)-3-(2,4-dichlorophenyl)acrylate (53)**

Following the general procedure, the reaction was conducted on a 0.2 mmol scale. **53** was isolated by PTLC (Dichloromethane/methanol = 20/1) as a light-yellow solid. In PBS (7.0 pH)/MeCN = 8/2 solvent, the case of PPh3 was selected as the catalyst, the reaction was completed in 1 h, with a 44% yield of **53** isolated (69 mg, E/Z > 98/2 as determined by 1H NMR). Alternatively, in PBS (7.0 pH)/MeCN = 8/2 solvent, the POL-PPh3 catalyst delivered a 54% yield of **53** after 2 h (85 mg, E/Z = 92/8 as determined by 1H NMR). Mp: 98-100 ºC. 1H NMR (400 MHz, Chloroform-*d*) δ 7.72 (s, 1H), 7.51 – 7.45 (m, 2H), 7.34 (dd, *J* = 8.3, 2.1 Hz, 1H), 6.79 (d, *J* = 8.1 Hz, 1H), 5.41 (d, *J* = 4.0 Hz, 1H), 4.88 – 4.74 (m, 2H), 4.25 – 4.14 (m, 2H), 3.58 – 3.48 (m, 2H), 3.11 – 2.94 (m, 2H), 2.43 (d, *J* = 7.9 Hz, 2H), 2.06 (s, 3H), 2.03 – 1.89 (m, 4H), 1.88 – 1.79 (m, 1H), 1.76 – 1.68 (m, 1H), 1.59 – 1.45 (m, 6H), 1.42 – 1.31 (m, 3H), 1.27 (t, *J* = 7.1 Hz, 3H), 1.23 – 1.08 (m, 7H), 1.06 (s, 3H), 1.04 – 0.94 (m, 4H), 0.92 (d, *J* = 6.5 Hz, 3H), 0.88 (d, *J* = 1.9 Hz, 3H), 0.86 (d, *J* = 1.9 Hz, 3H), 0.69 (s, 3H). 13C NMR (101 MHz, Chloroform-*d*) δ 170.7, 170.2, 166.1, 139.6, 136.7, 135.6, 135.1, 131.9, 131.6, 131.1, 129.7, 127.4, 123.0, 75.6, 61.9, 56.8, 56.2, 52.4, 50.1, 42.4, 39.8, 39.6, 38.2, 37.1, 36.7, 36.3, 35.9, 35.5, 32.0, 31.9, 30.2, 28.3, 28.1, 27.8, 24.4, 23.9, 23.2, 22.9, 22.7, 21.1, 19.5, 18.8, 14.3, 12.0. IR (KBr): 2936, 2867, 1716, 1661, 1468, 1373, 1275, 1132, 1028, 765, 750 cm-1. HRMS (ESI) m/z: [M + H]+ Calcd. for: C44H64NO5SCl2 788.3882; Found 788.3875.

**methyl 2-(acetoxy(4-ethynylphenyl)methyl)acrylate (54)**

As a yellow oil. 1H NMR (400 MHz, Chloroform-*d*) δ 7.49 – 7.44 (m, 2H), 7.37 – 7.32 (m, 2H), 6.65 (s, 1H), 6.41 (s, 1H), 5.90 – 5.87 (m, 1H), 3.71 (s, 3H), 3.09 (s, 1H), 2.11 (s, 3H). 13C NMR (101 MHz, Chloroform-*d*) δ 169.5, 165.3, 139.3, 138.6, 132.3, 127.7, 126.2, 122.3, 83.3, 77.9, 72.8, 52.2, 21.2. IR (KBr): 3287, 3005, 1720, 1650, 1569, 1438, 1406, 1275, 1261, 764, 750 cm-1. HRMS (ESI) m/z: [M + H]+ Calcd. for: C15H15O4 259.0970; Found 259.0966.

**but-3-yn-1-yl 2-(acetoxymethyl)acrylate (55)**

As a light-yellow oil. 1H NMR (400 MHz, Chloroform-*d*) δ 6.39 (d, *J* = 1.1 Hz, 1H), 5.86 (d, *J* = 1.4 Hz, 1H), 4.79 (s, 2H), 4.27 (t, *J* = 6.8 Hz, 2H), 2.56 (td, *J* = 6.8, 2.7 Hz, 2H), 2.08 (s, 3H), 1.99 (t, *J* = 2.7 Hz, 1H). 13C NMR (101 MHz, Chloroform-*d*) δ 170.6, 165.1, 135.2, 128.3, 80.0, 70.2, 62.8, 62.6, 21.1, 19.1. IR (KBr): 3289, 2989, 1729, 1644, 1369, 1275, 1261, 1161, 1050, 764, 750 cm-1. HRMS (ESI) m/z: [M + H]+ Calcd. for: C10H13O4 197.0814; Found 197.0817.

**methyl 2-(acetoxy(4-(1-((2R,3R,5S)-2-(hydroxymethyl)-5-(5-methyl-2,4-dioxo-3,4-dihydropyrimidin-1(2H)-yl)tetrahydrofuran-3-yl)-1H-1,2,3-triazol-4-yl)phenyl)methyl)acrylate (56)**

Under a nitrogen atmosphere, compound **54** (1.5 mmol, 3 equiv.), **zidovudine** (0.5 mmol, 1 equiv.), and 3 mL of **TBA** were added to a 10 mL reaction tube. Subsequently, an aqueous solution of CuSO₄·5H₂O (0.05 mmol, 0.1 equiv.) and sodium ascorbate (0.1 mmol, 0.2 equiv.) in 0.5 mL of water was added. The reaction mixture was stirred at room temperature for 12 hours. After completion, the biphasic mixture was extracted with dichloromethane (DCM) (3 × 5 mL), and the combined organic layers were dried over anhydrous Na₂SO₄. Purification by preparative thin-layer chromatography (PTLC) using a dichloromethane/methanol (10/1) solvent system afforded compound **56** as a white solid (85% yield). Mp: 101-103 ºC.1H NMR (400 MHz, Chloroform-*d*) δ 8.03 (s, 1H), 7.79 (s, 1H), 7.77 (s, 1H), 7.51 (s, 1H), 7.43 (s, 1H), 7.41 (s, 1H), 6.67 (s, 1H), 6.41 (s, 1H), 6.28 (t, *J* = 6.5 Hz, 1H), 5.90 (s, 1H), 5.55 – 5.48 (m, 1H), 4.48 – 4.43 (m, 1H), 4.02 (d, *J* = 10.0 Hz, 1H), 3.82 (d, *J* = 10.1 Hz, 1H), 3.70 (s, 3H), 3.48 (s, 1H), 3.04 – 2.91 (m, 2H), 2.11 (s, 3H), 1.84 (s, 3H).13C NMR (101 MHz, Chloroform-*d*) δ 169.7, 165.5, 164.4, 150.9, 147.5, 139.4, 138.1, 137.8, 130.3, 128.4, 126.3, 125.9, 120.3, 111.2, 88.0, 85.3, 73.0, 61.5, 59.5, 52.2, 37.7, 21.2, 12.5. IR (KBr): 3006, 1701, 1561, 1438, 1275, 1261, 1232, 1148, 1100, 764, 750 cm-1. HRMS (ESI) m/z: [M + H]+ Calcd. for: C25H28N5O8 526.1938; Found 526.1947.

**methyl 2-(acetoxy(4-(1-(2-(2-(5-((3aS,4S,6aR)-2-oxohexahydro-1H-thieno[3,4-d]imidazol-4-yl)pentanamido)ethoxy)ethyl)-1H-1,2,3-triazol-4-yl)phenyl)methyl)acrylate (57)**

Under a nitrogen atmosphere, compound **54** (1.5 mmol, 3 equiv.), **Biotins** (0.5 mmol, 1 equiv.), and 3 mL of **TBA** were added to a 10 mL reaction tube. Subsequently, an aqueous solution of CuSO₄·5H₂O (0.05 mmol, 0.1 equiv.) and sodium ascorbate (0.1 mmol, 0.2 equiv.) in 0.5 mL of water was added. The reaction mixture was stirred at room temperature for 12 hours. After completion, the biphasic mixture was extracted with dichloromethane (DCM) (3 × 5 mL), and the combined organic layers were dried over anhydrous Na₂SO₄. Purification by preparative thin-layer chromatography (PTLC) using a dichloromethane/methanol (10/1) solvent system afforded compound **57** as a light-yellow oil (83% yield). 1H NMR (400 MHz, Chloroform-*d*) δ 8.02 (s, 1H), 7.83 (s, 1H), 7.81 (s, 1H), 7.45 (s, 1H), 7.43 (s, 1H), 6.95 – 6.84 (m, 2H), 6.68 (s, 1H), 6.42 (s, 1H), 6.07 (s, 1H), 5.92 (s, 1H), 4.60 (t, *J* = 5.0 Hz, 2H), 4.46 (dd, *J* = 7.9, 4.7 Hz, 1H), 4.26 (dd, *J* = 7.9, 4.6 Hz, 1H), 3.92 (t, *J* = 5.0 Hz, 2H), 3.71 (s, 3H), 3.64 – 3.55 (m, 8H), 3.51 (t, *J* = 5.2 Hz, 2H), 3.38 (q, *J* = 5.4 Hz, 2H), 3.11 (q, *J* = 7.0 Hz, 1H), 2.86 (dd, *J* = 12.8, 4.8 Hz, 1H), 2.71 (d, *J* = 12.8 Hz, 1H), 2.19 (t, *J* = 7.6 Hz, 2H), 2.13 (s, 3H), 1.76 – 1.57 (m, 4H), 1.47 – 1.32 (m, 2H).13C NMR (101 MHz, Chloroform-*d*) δ 173.8, 169.8, 165.7, 164.7, 147.3, 139.6, 137.8, 131.2, 128.5, 126.4, 126.0, 121.6, 73.1, 70.8, 70.6, 70.6, 70.2, 70.1, 69.7, 62.0, 60.5, 56.1, 52.4, 50.6, 40.8, 39.3, 36.2, 28.6, 28.4, 26.0, 21.4. IR (KBr): 3286, 2926, 1702, 1544, 1458, 1371, 1275, 1260, 1230, 1147, 764, 750 cm-1. HRMS (ESI) m/z: [M + H]+ Calcd. for: C33H47N6O9S 703.3125; Found 703.3129.

**methyl (Z)-2-((((R)-2-acetamido-3-ethoxy-3-oxopropyl)thio)methyl)-3-(4-(1-((2R,3R,5S)-2-(hydroxymethyl)-5-(5-methyl-2,4-dioxo-3,4-dihydropyrimidin-1(2H)-yl)tetrahydrofuran-3-yl)-1H-1,2,3-triazol-4-yl)phenyl)acrylate (58)**

Following the general procedure, the reaction was conducted on a 0.2 mmol scale, **58** was isolated by PTLC (Dichloromethane/methanol = 10/1) as white solid. In the case of PPh3 was selected as the catalyst, the reaction was completed in 45 minutes, with a 94% yield of **58** isolated (123 mg, E/Z > 98/2 as determined by 1H NMR). Mp: 101-102 ºC1H NMR (400 MHz, Chloroform-*d*) δ 8.21 (s, 1H), 7.83 (d, *J* = 7.73 Hz, 2H), 7.65 (d, *J* = 26.06 Hz, 2H), 7.49 (d, *J* = 7.97 Hz, 2H), 7.17 (d, *J* = 7.86 Hz, 1H), 6.36 (s, 1H), 5.54 (s, 1H), 4.83 (q, *J* = 6.08, 5.59 Hz, 1H), 4.52 – 4.37 (m, 1H), 4.17 (q, *J* = 7.06 Hz, 2H), 4.00 (d, *J* = 11.21 Hz, 1H), 3.84 (s, 4H), 3.69 (q, *J* = 16.24, 15.82 Hz, 2H), 3.20 – 2.74 (m, 4H), 2.05 (s, 3H), 1.78 (s, 3H), 1.23 (t, *J* = 7.19 Hz, 3H). 13C NMR (101 MHz, Chloroform-*d*) δ 170.9, 170.8, 167.9, 151.4, 147.1, 141.0, 137.5, 134.5, 131.0, 130.4, 129.9, 129.3, 128.5, 126.0, 125.5, 120.9, 111.1, 87.2, 85.3, 62.0, 61.4, 59.6, 52.6, 52.6, 37.8, 35.4, 30.2, 23.1, 14.2, 12.6. IR (KBr): 3900, 3798, 3613, 2987, 1704, 1557, 1488, 1373, 1275, 1095, 750.cm-1. HRMS (ESI) m/z: [M + H]+ Calcd. for: C30H37N6O9S 657.2343; Found 657.2339.

**methyl (Z)-2-(((2-acetamido-3-ethoxy-3-oxopropyl)thio)methyl)-3-(4-(1-(13-oxo-17-((3aS,4S,6aR)-2-oxohexahydro-1H-thieno[3,4-d]imidazol-4-yl)-3,6,9-trioxa-12-azaheptadecyl)-1H-1,2,3-triazol-5-yl)phenyl)acrylate (59)**

Following the general procedure, the reaction was conducted on a 0.2 mmol scale, **59** was isolated by PTLC (Dichloromethane/methanol = 10/1) as light-yellow oil. In the case of PPh3 was selected as the catalyst, the reaction was completed in 45 minutes, with a 73% yield of **59** isolated (122 mg, E/Z > 98/2 as determined by 1H NMR). 1H NMR (400 MHz, Chloroform-*d*) δ 8.10 (s, 1H), 7.92 (d, *J* = 8.0 Hz, 2H), 7.76 (s, 1H), 7.57 (d, *J* = 8.0 Hz, 2H), 7.18 (d, *J* = 8.0 Hz, 1H), 6.86 (t, *J* = 5.7 Hz, 1H), 6.64 (s, 1H), 5.86 (s, 1H), 4.86 (dt, *J* = 8.1, 5.0 Hz, 1H), 4.62 (t, *J* = 5.0 Hz, 2H), 4.46 (dd, *J* = 7.9, 4.7 Hz, 1H), 4.27 (dd, *J* = 8.1, 4.7 Hz, 1H), 4.20 (q, *J* = 7.1 Hz, 2H), 3.94 (t, *J* = 5.0 Hz, 2H), 3.87 (s, 3H), 3.78 – 3.68 (m, 2H), 3.66 – 3.54 (m, 8H), 3.52 (t, *J* = 5.2 Hz, 2H), 3.39 (q, *J* = 5.5 Hz, 2H), 3.09 (t, *J* = 5.3 Hz, 2H), 2.86 (dd, *J* = 12.8, 4.8 Hz, 1H), 2.73 (t, *J* = 13.9 Hz, 2H), 2.17 (t, *J* = 7.5 Hz, 2H), 2.07 (s, 3H), 1.64 (qd, *J* = 16.1, 13.2, 6.0 Hz, 4H), 1.40 (m, *J* = 8.1, 7.3 Hz, 2H), 1.27 (t, *J* = 7.1 Hz, 3H). 13C NMR (101 MHz, Chloroform-*d*) δ 173.5, 171.0, 170.5, 167.9, 164.3, 146.9, 141.2, 134.2, 131.7, 130.4, 128.4, 126.0, 121.7, 70.6, 70.4, 70.4, 70.1, 69.5, 61.9, 60.3, 55.8, 52.6, 52.5, 50.5, 40.6, 39.2, 35.9, 35.4, 30.2, 28.3, 28.2, 25.7, 23.1, 14.2. IR (KBr): 3281, 2927, 1702, 1546, 1436, 1372, 1275, 1119, 919, 764, 557 cm-1. HRMS (ESI) m/z: [M + H]+ Calcd. for: C38H56N7O10S2 834.3530; Found 834.3521.

**2-(1-((2S,3S,5R)-2-(hydroxymethyl)-5-(5-methyl-2,4-dioxo-3,4-dihydropyrimidin-1(2H)-yl)tetrahydrofuran-3-yl)-1H-1,2,3-triazol-4-yl)ethyl 2-(acetoxymethyl)acrylate (60)**

Under a nitrogen atmosphere, compound **55** (1.5 mmol, 3 equiv.), **zidovudine** (0.5 mmol, 1 equiv.), and 3 mL of **TBA** were added to a 10 mL reaction tube. Subsequently, an aqueous solution of CuSO₄·5H₂O (0.05 mmol, 0.1 equiv.) and sodium ascorbate (0.1 mmol, 0.2 equiv.) in 0.5 mL of water was added. The reaction mixture was stirred at room temperature for 12 hours. After completion, the biphasic mixture was extracted with dichloromethane (DCM) (3 × 5 mL), and the combined organic layers were dried over anhydrous Na₂SO₄. Purification by preparative thin-layer chromatography (PTLC) using a dichloromethane/methanol (10/1) solvent system afforded compound **60** as a white solid (86% yield). Mp: 123-125 ºC.1H NMR (400 MHz, Chloroform-*d*) δ 7.66 (s, 1H), 7.59 (s, 1H), 6.36 (s, 1H), 6.30 (t, *J* = 6.3 Hz, 1H), 5.85 (s, 1H), 5.46 (q, *J* = 6.5 Hz, 1H), 4.76 (s, 2H), 4.46 (t, *J* = 6.6 Hz, 2H), 4.41 (d, *J* = 5.6 Hz, 1H), 4.00 (d, *J* = 9.9 Hz, 1H), 3.80 (d, *J* = 10.0 Hz, 1H), 3.13 (t, *J* = 6.6 Hz, 2H), 3.03 – 2.89 (m, 2H), 2.10 (s, 3H), 1.88 (s, 3H).13C NMR (101 MHz, Chloroform-*d*) δ 171.2, 165.5, 164.8, 151.2, 144.7, 138.1, 135.6, 128.4, 122.5, 111.6, 88.2, 85.7, 64.1, 62.8, 61.8, 59.7, 38.2, 25.9, 21.4, 12.9. IR (KBr): 3006, 2989, 1698, 1462, 1275, 1261, 1488, 1373, 1275, 1261, 750 cm-1. HRMS (ESI) m/z: [M + H]+ Calcd. for: C20H26N5O8 464.1781; Found 464.1778.

**2-(1-(13-oxo-17-((3aR,4R,6aS)-2-oxohexahydro-1H-thieno[3,4-d]imidazol-4-yl)-3,6,9-trioxa-12-azaheptadecyl)-1H-1,2,3-triazol-4-yl)ethyl 2-(acetoxymethyl)acrylate (61)**

Under a nitrogen atmosphere, compound **55** (1.5 mmol, 3 equiv.), **Biotins** (0.5 mmol, 1 equiv.), and 3 mL of **TBA** were added to a 10 mL reaction tube. Subsequently, an aqueous solution of CuSO₄·5H₂O (0.05 mmol, 0.1 equiv.) and sodium ascorbate (0.1 mmol, 0.2 equiv.) in 0.5 mL of water was added. The reaction mixture was stirred at room temperature for 12 hours. After completion, the biphasic mixture was extracted with dichloromethane (DCM) (3 × 5 mL), and the combined organic layers were dried over anhydrous Na₂SO₄. Purification by preparative thin-layer chromatography (PTLC) using a dichloromethane/methanol (10/1) solvent system afforded compound **61** as a light-yellow solid (90% yield). Mp: 58-60 ºC. 1H NMR (400 MHz, Chloroform-*d*) δ 7.58 (s, 1H), 6.83 (d, *J* = 5.9 Hz, 1H), 6.67 (d, *J* = 6.3 Hz, 1H), 6.36 (t, 1H), 5.85 (t, *J* = 1.3 Hz, 1H), 5.78 (d, *J* = 12.1 Hz, 1H), 4.78 (d, *J* = 1.3 Hz, 2H), 4.53 (t, *J* = 5.2 Hz, 2H), 4.50 – 4.48 (m, 1H), 4.48 – 4.44 (m, 2H), 4.33 – 4.28 (m, 1H), 3.89 (t, 2H), 3.62 – 3.58 (m, 8H), 3.55 (t, *J* = 5.6 Hz, 2H), 3.43 (t, *J* = 5.2 Hz, 2H), 3.17 – 3.14 (m, 1H), 3.14 – 3.09 (m, 2H), 2.92 – 2.86 (m, 1H), 2.74 (d, *J* = 12.8 Hz, 1H), 2.22 (t, *J* = 7.5 Hz, 2H), 2.10 (s, 3H), 1.77 – 1.61 (m, 4H), 1.44 (q, *J* = 7.4 Hz, 2H). 13C NMR (101 MHz, Chloroform-*d*) δ 173.5, 170.5, 165.1, 164.2, 143.7, 135.2, 127.9, 122.8, 70.6, 70.4, 70.1, 70.0, 69.6, 63.9, 62.4, 61.8, 60.3, 55.8, 50.2, 40.6, 39.2, 36.0, 28.3, 28.2, 25.7, 25.5, 21.0. IR (KBr): 3279, 3005, 2989, 2318, 1699, 1552, 1460, 1275, 1261, 1117, 750 cm-1. HRMS (ESI) m/z: [M + H]+ Calcd. for: C28H45N6O9S 641.2969; Found 641.2978.

**2-(1-((2S,3S,5R)-2-(hydroxymethyl)-5-(5-methyl-2,4-dioxo-3,4-dihydropyrimidin-1(2H)-yl)tetrahydrofuran-3-yl)-1H-1,2,3-triazol-4-yl)ethyl 2-((((R)-2-acetamido-3-ethoxy-3-oxopropyl)thio)methyl)acrylate (62)**

Following the general procedure, the reaction was conducted on a 0.2 mmol scale, **62** was isolated by PTLC (Dichloromethane/methanol = 10/1) as a colorless oil. In PBS (7.0 pH)/EtOH= 8/2 solvent, POL-PPh3 catalyst delivered a 90% yield of **62** after 30 minutes (107 mg). 1H NMR (400 MHz, Chloroform-*d* ) δ 7.69 (s, 1H), 7.57 (d, *J* = 1.5 Hz, 1H), 6.78 (d, *J* = 7.7 Hz, 1H), 6.31 (t, *J* = 6.5 Hz, 1H), 6.26 (s, 1H), 5.71 (s, 1H), 5.52 – 5.45 (m, 1H), 4.86 – 4.79 (m, 1H), 4.57 – 4.49 (m, 2H), 4.48 – 4.45 (m, 1H), 4.25 (q, *J* = 7.2 Hz, 2H), 4.04 (dd, *J* = 12.4, 2.4 Hz, 1H), 3.84 (dd, *J* = 12.4, 2.5 Hz, 1H), 3.80 – 3.66 (m, 1H), 3.41 (s, 2H), 3.19 (t, *J* = 6.1 Hz, 2H), 3.07 – 2.98 (m, 2H), 2.96 – 2.87 (m, 2H), 2.10 (s, 3H), 1.96 (s, 3H), 1.32 (t, 3H). 13C NMR (101 MHz, Chloroform-*d*) δ 170.9, 170.5, 165.8, 163.8, 150.5, 144.6, 137.6, 136.3, 127.3, 122.1, 111.3, 88.2, 85.3, 63.9, 62.1, 61.5, 59.1, 52.0, 37.7, 33.8, 33.3, 25.5, 23.1, 14.2, 12.5. IR (KBr): 2939, 1766, 1713, 1510, 1371, 1275, 1197, 1031, 764, 750 cm-1. HRMS (ESI) m/z: [M + H]+ Calcd. for: C25H35N6O9S 595.2186; Found 595.2181.

**2-(1-(13-oxo-17-((3aR,4R,6aS)-2-oxohexahydro-1H-thieno[3,4-d]imidazol-4-yl)-3,6,9-trioxa-12-azaheptadecyl)-1H-1,2,3-triazol-4-yl)ethyl 2-((((S)-2-acetamido-3-ethoxy-3-oxopropyl)thio)methyl)acrylate (63)**

Following the general procedure, the reaction was conducted on a 0.2 mmol scale, **63** was isolated by PTLC (Dichloromethane/methanol = 10/1) as light-yellow oil. In PBS (7.0 pH)/EtOH= 8/2 solvent, POL-PPh3 catalyst delivered a 95% yield of **63** after 30 minutes (147 mg). 1H NMR (400 MHz, Chloroform-*d* ) δ 7.61 (s, 1H), 7.00 (d, *J* = 7.8 Hz, 1H), 6.92 (t, *J* = 5.7 Hz, 1H), 6.61 (s, 1H), 6.21 (s, 1H), 5.86 (s, 1H), 5.69 (s, 1H), 4.82 – 4.72 (m, 1H), 4.56 – 4.44 (m, 5H), 4.37 – 4.27 (m, 1H), 4.21 (q, *J* = 7.1 Hz, 2H), 3.88 (t, *J* = 5.1 Hz, 2H), 3.63 – 3.58 (m, 8H), 3.55 (t, *J* = 5.3 Hz, 2H), 3.43 (t, *J* = 5.4 Hz, 2H), 3.38 (s, 2H), 3.13 (t, *J* = 6.9 Hz, 3H), 2.96 – 2.83 (m, 3H), 2.74 (d, *J* = 12.8 Hz, 1H), 2.21 (t, *J* = 7.5 Hz, 2H), 2.05 (s, 3H), 1.75 – 1.60 (m, 4H), 1.44 (q, *J* = 7.5 Hz, 2H), 1.29 (t, *J* = 7.1 Hz, 3H).13C NMR (101 MHz, Chloroform-*d*) δ 173.2, 170.8, 170.1, 165.6, 163.9, 143.5, 136.0, 126.8, 122.6, 70.2, 70.2, 70.1, 69.8, 69.7, 69.3, 63.7, 61.7, 61.6, 60.0, 55.5, 51.7, 49.9, 40.3, 38.9, 35.7, 33.2, 32.9, 28.0, 27.9, 25.4, 25.2, 22.8, 13.9. IR (KBr): 3282, 3005, 2989, 2319, 1726, 1460, 1276, 1261, 1161, 897, 750 cm-1. HRMS (ESI) m/z: [M + H]+ Calcd. for: C33H54N7O10S2 772.3374; Found 772.3379.

**methyl 2-(acetoxy(4-(((5-(dimethylamino)naphthalen-1-yl)sulfonyl)oxy)phenyl)methyl)acrylate (64)**

As a light-green solid. Mp: 86-88 ºC. 1H NMR (400 MHz, Chloroform-*d*) δ 8.58 (d, *J* = 8.6 Hz, 1H), 8.42 (d, *J* = 8.7 Hz, 1H), 8.07 (dd, *J* = 7.3, 1.3 Hz, 1H), 7.64 (dd, *J* = 8.7, 7.6 Hz, 1H), 7.43 (dd, *J* = 8.6, 7.3 Hz, 1H), 7.21 (t, *J* = 8.3 Hz, 3H), 6.86 (d, *J* = 8.7 Hz, 2H), 6.55 (s, 1H), 6.33 (s, 1H), 5.78 (s, 1H), 3.65 (s, 3H), 2.88 (s, 6H), 2.05 (s, 3H).13C NMR (101 MHz, Chloroform-*d*) δ 169.4, 165.2, 152.0, 149.6, 139.3, 136.8, 132.2, 131.3, 131.0, 130.1, 129.8, 129.2, 129.1, 126.2, 123.1, 122.2, 119.4, 115.7, 72.2, 52.2, 45.5, 21.1. IR (KBr): 2989, 1745, 1571, 1503, 1371, 1275, 1261, 1230, 1147, 1030, 868, 791, 750 cm-1. HRMS (ESI) m/z: [M + H]+ Calcd. for: C25H26NO7S 484.1430; Found 484.1438.

**methyl (R,Z)-2-(((2-acetamido-3-ethoxy-3-oxopropyl)thio)methyl)-3-(4-(((5-(dimethylamino)naphthalen-1-yl)sulfonyl)oxy)phenyl)acrylate (65)**

Following the general procedure, the reaction was conducted on a 0.2 mmol scale. **65** was isolated by PTLC (Dichloromethane/methanol = 20/1) as a light-green oil. In PBS (7.0 pH)/MeCN = 8/2 solvent, POL-PPh3 catalyst delivered a 95% yield of **65** after 3 h (117 mg, E/Z = 94/6 as determined by 1H NMR). 1H NMR (400 MHz, Chloroform-*d*) δ 8.60 (d, *J* = 8.6 Hz, 1H), 8.44 (d, *J* = 8.7 Hz, 1H), 8.08 (dd, *J* = 7.3, 1.3 Hz, 1H), 7.69 – 7.63 (m, 1H), 7.59 (s, 1H), 7.47 – 7.43 (m, 1H), 7.32 (d, *J* = 8.7 Hz, 2H), 7.25 (d, *J* = 7.5 Hz, 1H), 6.97 (d, *J* = 8.7 Hz, 2H), 6.73 (d, *J* = 8.0 Hz, 1H), 4.87 – 4.76 (m, 1H), 4.17 (q, *J* = 7.2 Hz, 2H), 3.82 (s, 3H), 3.62 – 3.51 (m, 2H), 3.02 (qd, *J* = 14.2, 4.7 Hz, 2H), 2.90 (s, 6H), 2.03 (s, 3H), 1.23 (t, *J* = 7.1 Hz, 3H). 13C NMR (101 MHz, Chloroform-*d*) δ 170.7, 170.2, 167.6, 152.1, 150.1, 140.1, 133.5, 132.3, 131.3, 131.0, 130.3, 129.9, 129.8, 129.2, 129.1, 123.1, 122.6, 119.4, 115.8, 61.9, 52.6, 52.4, 45.5, 35.5, 30.0, 23.1, 14.2. IR (KBr): 3293, 2951, 1766, 1715, 1510, 1371, 1255, 1198, 1126, 1079, 1031, 864, 747 cm-1. HRMS (ESI) m/z: [M + H]+ Calcd. for: C30H35N2O8S2 615.1835; Found 615.1843.

**2-((4-methyl-2-oxo-2H-chromen-7-yl)oxy)ethyl 2-(acetoxymethyl)acrylate (66)**

As a white solid. Mp: 90-92 ºC. 1H NMR (400 MHz, Chloroform-*d*) δ 7.46 (d, *J* = 8.8 Hz, 1H), 6.84 (dd, *J* = 8.8, 2.5 Hz, 1H), 6.76 (d, *J* = 2.5 Hz, 1H), 6.37 (s, 1H), 6.08 (d, *J* = 1.5 Hz, 1H), 5.86 (d, *J* = 1.3 Hz, 1H), 4.77 (s, 2H), 4.53 (t, *J* = 4.6 Hz, 2H), 4.25 (t, *J* = 4.6 Hz, 2H), 2.35 (s, 3H), 2.04 (s, 3H). 13C NMR (101 MHz, Chloroform-*d*) δ 170.8, 170.1, 165.8, 161.5, 161.3, 155.2, 152.7, 136.0, 127.6, 125.8, 114.1, 112.6, 112.3, 101.7, 66.3, 63.1, 62.0, 52.0, 33.6, 33.3, 23.2, 18.8, 14.2. IR (KBr): 3005, 2989, 1721, 1615, 1390, 1275, 1261, 1152, 1074, 851, 750 cm-1. HRMS (ESI) m/z: [M + H]+ Calcd. for: C18H19O7 347.1131; Found 347.1139.

**2-((4-methyl-2-oxo-2H-chromen-7-yl)oxy)ethyl 2-(((2-acetamido-3-ethoxy-3-oxopropyl)thio)methyl)acrylate (67)**

Following the general procedure, the reaction was conducted on a 0.2 mmol scale, **67** was isolated by PTLC (Dichloromethane/methanol = 20/1) as white solid. In PBS (7.0 pH)/EtOH = 8/2 solvent, POL-PPh3 catalyst delivered a 93% yield of **67** after 30 minutes (117 mg, E/Z = 94/6 as determined by 1H NMR).Mp: 106-108 ºC. 1H NMR (400 MHz, Chloroform-*d*) δ 7.48 (d, *J* = 8.8 Hz, 1H), 6.85 (dd, *J* = 8.8, 2.5 Hz, 1H), 6.79 (d, *J* = 2.5 Hz, 1H), 6.51 (d, *J* = 7.7 Hz, 1H), 6.22 (d, *J* = 0.9 Hz, 1H), 6.11 (d, *J* = 1.3 Hz, 1H), 5.69 (d, *J* = 1.0 Hz, 1H), 4.80 – 4.71 (m, 1H), 4.56 – 4.49 (m, 2H), 4.29 – 4.23 (m, 2H), 4.17 (q, *J* = 7.1 Hz, 2H), 3.36 (d, *J* = 0.9 Hz, 2H), 2.87 (qd, 2H), 2.36 (d, *J* = 1.2 Hz, 3H), 2.01 (s, 3H), 1.24 (t, *J* = 7.1 Hz, 3H).13C NMR (101 MHz, Chloroform-*d*) δ 170.8, 170.1, 165.8, 161.5, 161.3, 155.2, 152.7, 136.0, 127.6, 125.8, 114.1, 112.6, 112.3, 101.7, 66.3, 63.1, 62.0, 52.0, 33.6, 33.3, 23.2, 18.8, 14.2. IR (KBr): 3447, 2993, 2831, 2717, 1770, 1597, 1363, 1275, 1259, 1131, 750cm-1. HRMS (ESI) m/z: [M + H]+ Calcd. for: C23H28NO8S 478.1536; Found 478.1532.

# References

1. Camilo, N. S.; Santos H.; Zeoly, L. A.; Fernandes, F. S.; Rodrigues, M. T.; Jr.; Silva, T. S.; Lima, S. R.; Serafim, J. C.; de Oliveira, A. S. B.; Carpanez, A. G.; Amarante, G. W.; Coelho, Fernando. An Improved Protocol for the Morita-Baylis-Hillman Reaction Allows Unprecedented Broad Synthetic Scope. *Eur. J. Org. Chem.* **2022**, *2022*, e202101448.
2. Wang, W. X.; Zhang, Q. Z.; Zhang, T. Q.; Li, Z. S.; Zhang, W.; Yu, W. N-Bromosuccinimide-Mediated Radical Cyclization of 3-Arylallyl Azides: Synthesis of 3-Substituted Quinolines. *Advanced Synthesis & Catalysis*. **2015**, *357*, 221-226.
3. Dolan, C.; Naysmith, B.; Hinkley, S. F. R.; Sims, I. M.; Brimble, M. A.; Williams, D. E.; Jin, J. Y. Synthesis of Novel Triazole-Containing Phosphonate Polymers. *Aust. J. Chem*. **2015**, *68*, 680-686.
4. Oku, Y.; Nakajima, N.; Hamada, M.; Koyama, Y. Dansylated Nitrile N-Oxide as the Fluorescent Dye Clickable to Unsaturated Bonds without Catalyst. *Chem. Eur. J.* **2024**, *30*, e202400712.
5. Gindre, D.; Iliopoulos, K.; Krupka, O.; Evrard, M.; Champigny, E.; Sallé, M. Coumarin-Containing Polymers for High Density Non-Linear Optical Data Storage. *Molecules.* **2016**, *21*,147.
6. Shen, M. H.; Wang, Y. J.; Wang, Y.; Zhou, Y.; Gu, J.; Liu, X. Q.; Guo, J.; Ouyang, M.; Deng, L.; and Xu, H. D. α-Vinyl azide–cysteine click coupling reaction enabled bioorthogonal peptide/protein modification. *Org. Chem. Front*. **2022**, *9*, 4654-4662.
7. Pang, L. P.; Yang, C. J.; Lin, H. M.; Li, X. Y.; Tang, H. T.; Pan, Y. M. Porous Organophosphine Ligand Polymers as Recyclable Ligands for the Synthesis of Isoindolinone Compounds. *Chin. J. Org. Chem*. **2022**, *42*, 2117-2123.
8. Choi, M. K. W.; He, H. S.; Toy, P. H. Direct Radical Polymerization of 4-Styryldiphenylphosphine: Preparation of Cross-Linked and Non-Cross-Linked Triphenylphosphine-Containing Polystyrene Polymers. *J. Org. Chem*. **2003**, *68*, 9831-9834.
9. Fritsch, J.; Drache, F.; Nickerl, G.; Böhlmann, W.; Kaskel, S. Porous phosphorus-based element organic frameworks: A new platform for transition metal catalysts immobilization. *Micropor. Mesopor. Mat.* **2013**, *172*, 167-173.
10. Esteban, N.; Claros, M.; Álvarez, C.; Lozano, Á. E.; Bartolomé, C.; Martínez-Ilarduya, J. M.; Miguel, J. A. Palladium Catalysts Supported in Microporous Phosphine Polymer Networks. *Polymers* **2023**, *15* , 4143.
11. Xue, J.; Zhang, Y. S.; Huan, Z.; Yang, J. D.; Cheng, J. P. Deoxygenation of Phosphine Oxides by PIII/PV═O Redox Catalysis via Successive Isodesmic Reactions. *J. Am. Chem. Soc*. **2023**, *145*, 15589−15599.

# NMR Spectra for New Compounds

**Figure S29.** 1H NMR (400 MHz, Chloroform*-d*) spectra for compound **3**

**Figure S30.** 13C NMR (101 MHz, Chloroform*-d*) spectra for compound **3**

**Figure S31.** 1H NMR (400 MHz, Chloroform*-d*) spectra for compound **4**

**Figure S32.** 13C NMR (101 MHz, Chloroform*-d*) spectra for compound **4**

**Figure S33.** 1H NMR (400 MHz, Chloroform*-d*) spectra for compound **5**

**Figure S34.** 13C NMR (101 MHz, Chloroform*-d*) spectra for compound **5**

**Figure S35.** 1H NMR (400 MHz, Chloroform*-d*) spectra for compound **6**

**Figure S36.** 13C NMR (101 MHz, Chloroform*-d*) spectra for compound **6**

**Figure S37.** 1H NMR (400 MHz, Chloroform*-d*) spectra for compound **7**

**Figure S38.** 13C NMR (101 MHz, Chloroform*-d*) spectra for compound **7**

**Figure S39.** 19F NMR (376 MHz, Chloroform*-d*) spectra for compound **7**

**Figure S40.** 1H NMR (400 MHz, Chloroform*-d*) spectra for compound **8**

**Figure S41.** 13C NMR (101 MHz, Chloroform*-d*) spectra for compound **8**

**Figure S42.** 1H NMR (400 MHz, Chloroform*-d*) spectra for compound **9**

**Figure S43.** 13C NMR (101 MHz, Chloroform*-d*) spectra for compound **9**

**Figure S44.** 1H NMR (400 MHz, Chloroform*-d*) spectra for compound **10**

**Figure S45.** 13C NMR (101 MHz, Chloroform*-d*) spectra for compound **10**

**Figure S46.** 1H NMR (400 MHz, Chloroform*-d*) spectra for compound **11**

**Figure S47.** 13C NMR (101 MHz, Chloroform*-d*) spectra for compound **11**


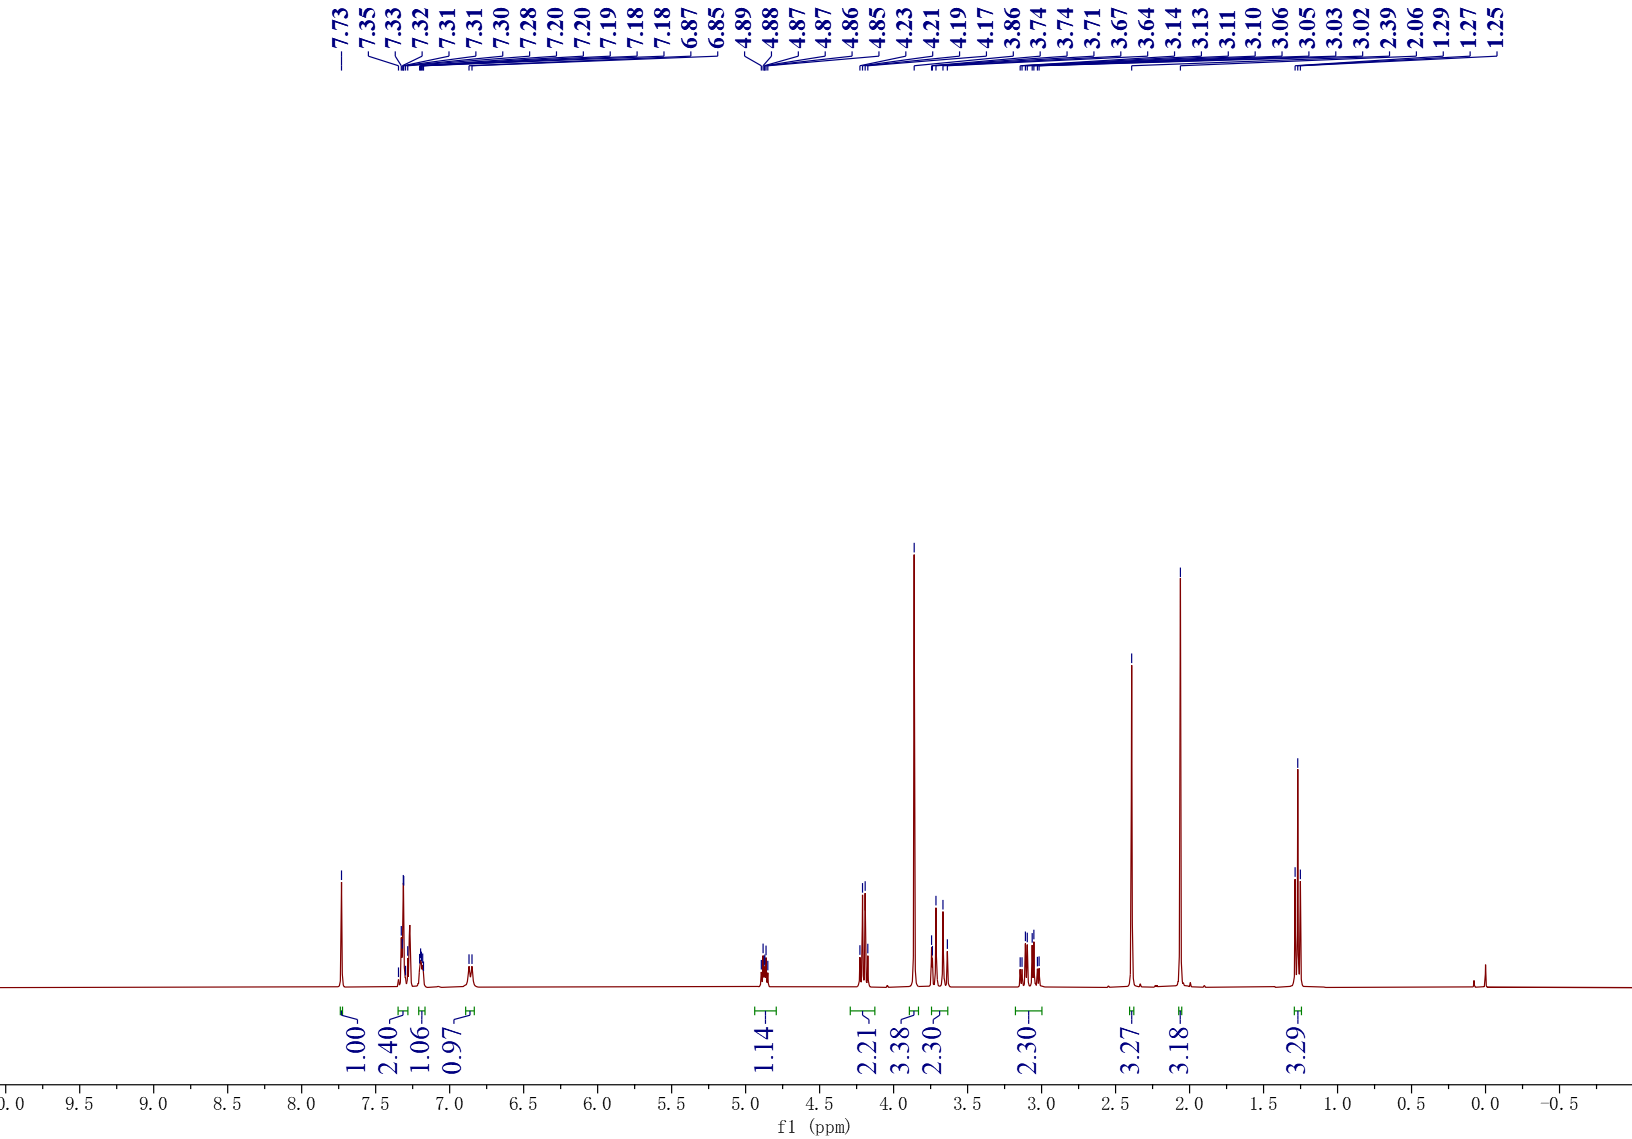


**Figure S48.** 1H NMR (400 MHz, Chloroform*-d*) spectra for compound **12**

**Figure S49.** 13C NMR (101 MHz, Chloroform*-d*) spectra for compound **12**

**Figure S50.** 1H NMR (400 MHz, Chloroform*-d*) spectra for compound **13**

**Figure S51.** 13C NMR (101 MHz, Chloroform*-d*) spectra for compound **13**

**Figure S52.** 1H NMR (400 MHz, Chloroform*-d*) spectra for compound **14**

**Figure S53.** 13C NMR (101 MHz, Chloroform*-d*) spectra for compound **14**

**Figure S54.** 19F NMR (376 MHz, Chloroform*-d*) spectra for compound **14**

**Figure S55.** 1H NMR (400 MHz, Chloroform*-d*) spectra for compound **15**

**Figure S56.** 13C NMR (101 MHz, Chloroform*-d*) spectra for compound **15**

**Figure S57.** 1H NMR (400 MHz, Chloroform*-d*) spectra for compound **16**

**Figure S58.** 13C NMR (101 MHz, Chloroform*-d*) spectra for compound **16**

**Figure S59.** 1H NMR (400 MHz, Chloroform*-d*) spectra for compound **17**

**Figure S60.** 13C NMR (101 MHz, Chloroform*-d*) spectra for compound **17**

**Figure S61.** 1H NMR (400 MHz, Chloroform*-d*) spectra for compound **18**

**Figure S62.** 13C NMR (101 MHz, Chloroform*-d*) spectra for compound **18**

**Figure S63.** 1H NMR (400 MHz, Chloroform*-d*) spectra for compound **19**

**Figure S64.** 13C NMR (101 MHz, Chloroform*-d*) spectra for compound **19**

**Figure S65.** 1H NMR (400 MHz, Chloroform*-d*) spectra for compound **20**

**Figure S66.** 13C NMR (101 MHz, Chloroform*-d*) spectra for compound **20**

**Figure S67.** 1H NMR (400 MHz, Chloroform*-d*) spectra for compound **21**

**Figure S68.** 13C NMR (101 MHz, Chloroform*-d*) spectra for compound **21**

**Figure S69.** 1H NMR (400 MHz, Chloroform*-d*) spectra for compound **22**

**Figure S70.** 13C NMR (101 MHz, Chloroform*-d*) spectra for compound **22**

**Figure S71.** 1H NMR (400 MHz, Chloroform*-d*) spectra for compound **23**

**Figure S72.** 13C NMR (101 MHz, Chloroform*-d*) spectra for compound **23**

**Figure S73.** 1H NMR (400 MHz, Chloroform*-d*) spectra for compound **24**

**Figure S74.** 13C NMR (101 MHz, Chloroform*-d*) spectra for compound **24**

**Figure S75.** 1H NMR (400 MHz, Chloroform*-d*) spectra for compound **25**

**Figure S76.** 13C NMR (101 MHz, Chloroform*-d*) spectra for compound **25**

**Figure S77.** 1H NMR (400 MHz, Chloroform*-d*) spectra for compound **26**

**Figure S78.** 13C NMR (101 MHz, Chloroform*-d*) spectra for compound **26**

**Figure S79.** 1H NMR (400 MHz, Chloroform*-d*) spectra for compound **27**

**Figure S80.** 13C NMR (101 MHz, Chloroform*-d*) spectra for compound **27**

**Figure S81.** 1H NMR (400 MHz, Chloroform*-d*) spectra for compound **28**

**Figure S82.** 13C NMR (101 MHz, Chloroform*-d*) spectra for compound **28**

**Figure S83.** 1H NMR (400 MHz, Chloroform*-d*) spectra for compound **29**

**Figure S84.** 13C NMR (101 MHz, Chloroform*-d*) spectra for compound **29**

**Figure S85.** 1H NMR (400 MHz, Chloroform*-d*) spectra for compound **30**

**Figure S86.** 13C NMR (101 MHz, Chloroform*-d*) spectra for compound **30**

**Figure S87.** 1H NMR (400 MHz, Chloroform*-d*) spectra for compound **31**

**Figure S88.** 13C NMR (101 MHz, Chloroform*-d*) spectra for compound **31**

**Figure S89.** 1H NMR (400 MHz, Chloroform*-d*) spectra for compound **32**

**Figure S90.** 13C NMR (101 MHz, Chloroform*-d*) spectra for compound **32**

**Figure S91.** 1H NMR (400 MHz, Chloroform*-d*) spectra for compound **33**

**Figure S92.** 13C NMR (101 MHz, Chloroform*-d*) spectra for compound **33**

**Figure S93.** 19F NMR (376 MHz, Chloroform*-d*) spectra for compound **33**


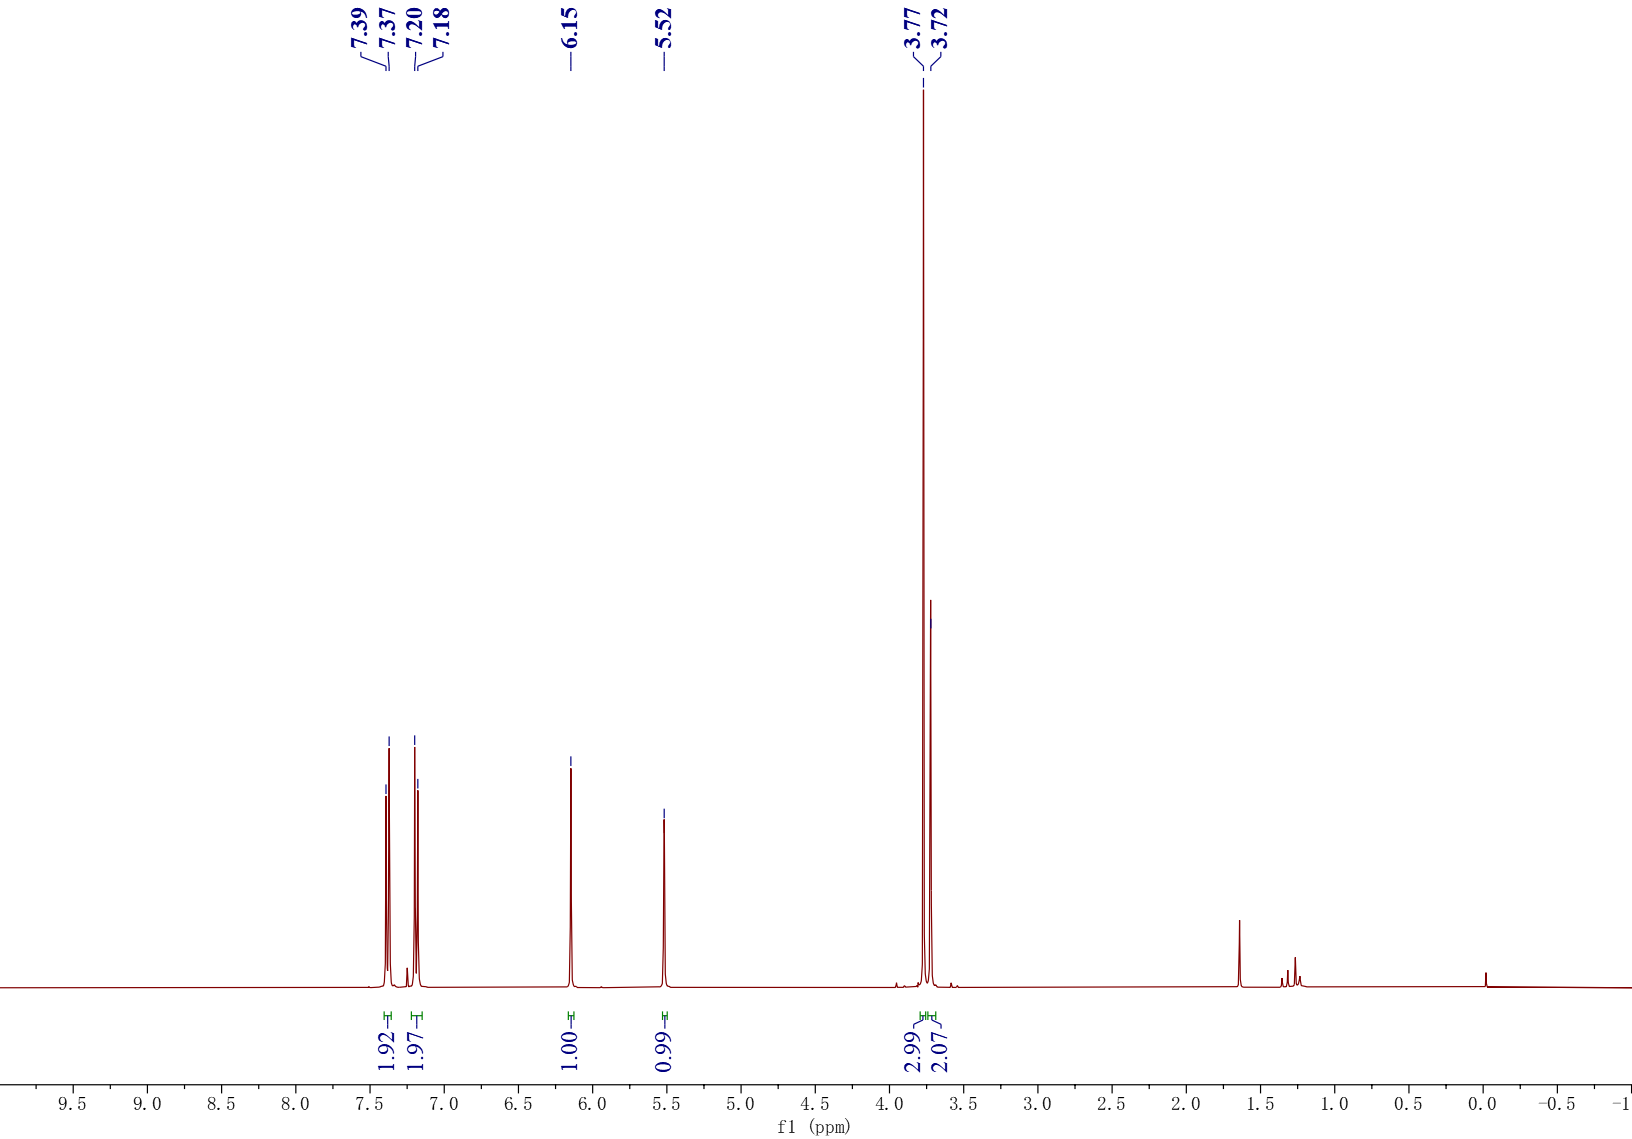


**Figure S94.** 1H NMR (400 MHz, Chloroform*-d*) spectra for compound **34**


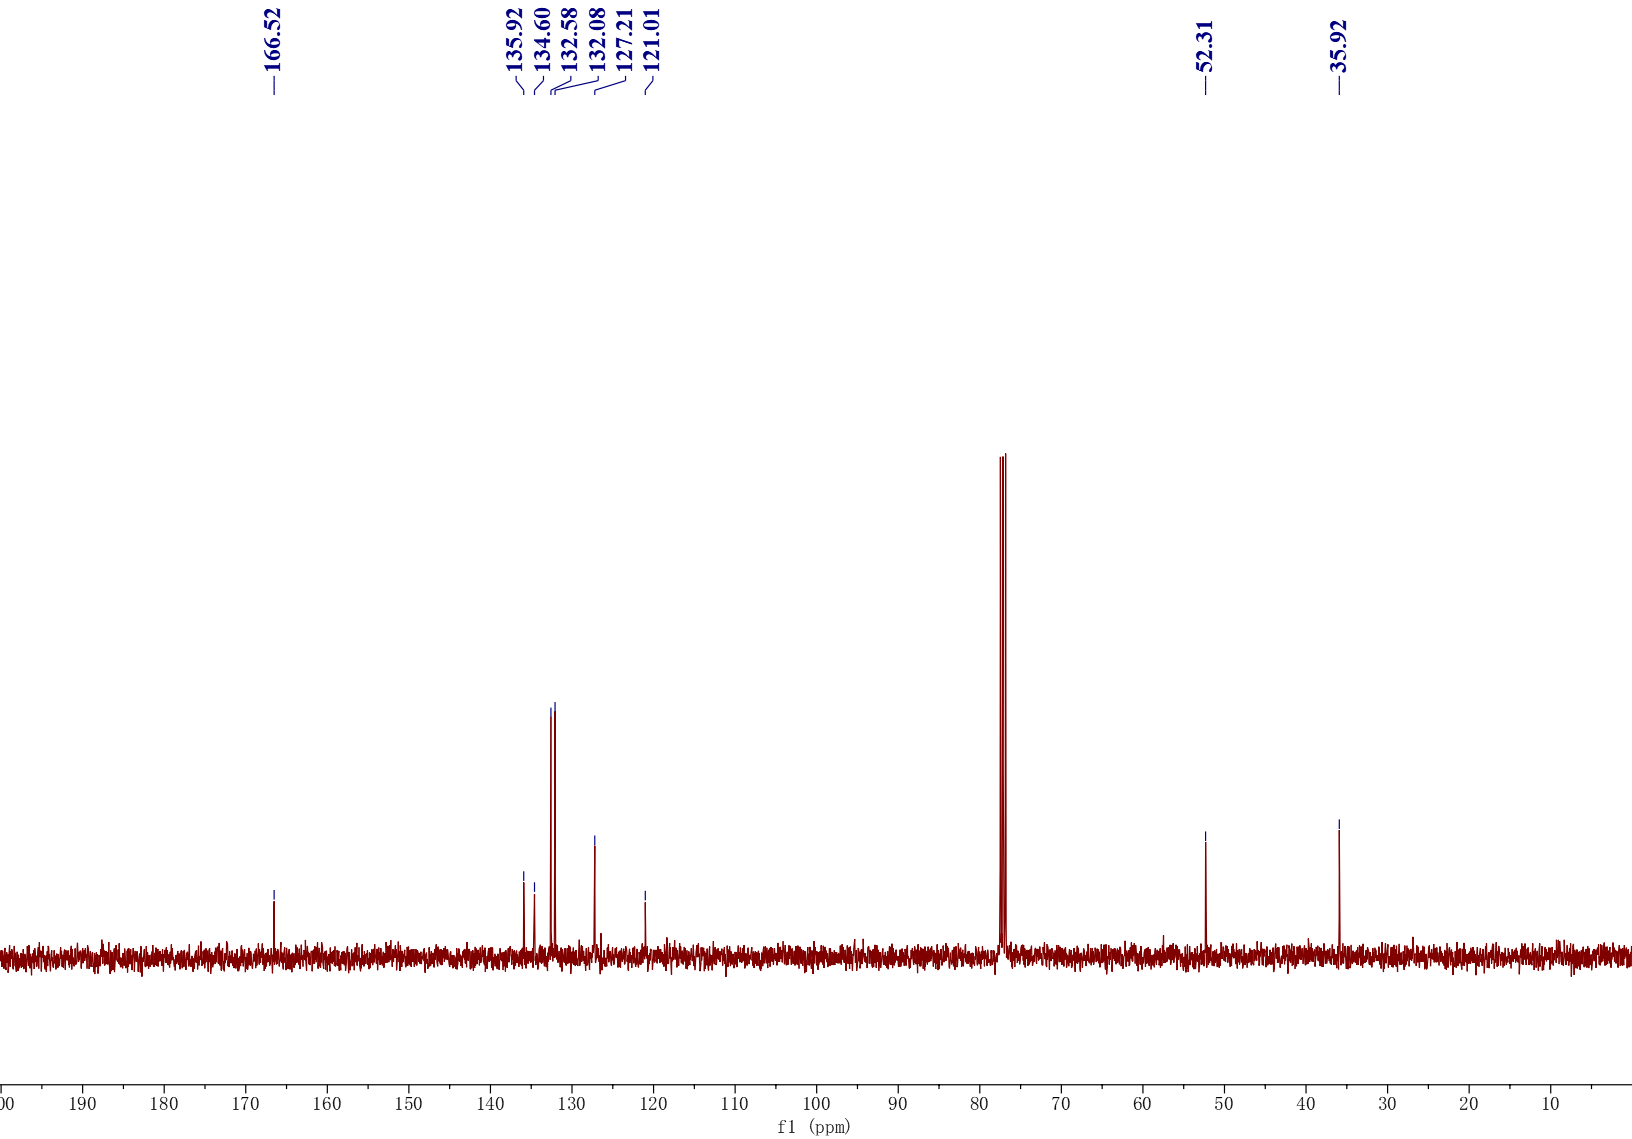


**Figure S95.** 13C NMR (101 MHz, Chloroform*-d*) spectra for compound **34**

**Figure S96.** 1H NMR (400 MHz, Chloroform*-d*) spectra for compound **35**

**Figure S97.** 13C NMR (101 MHz, Chloroform*-d*) spectra for compound **35**

**Figure S98.** 1H NMR (400 MHz, Chloroform*-d*) spectra for compound **36**

**Figure S99.** 13C NMR (101 MHz, Chloroform*-d*) spectra for compound **36**

**Figure S100.** 1H NMR (400 MHz, Chloroform*-d*) spectra for compound **37**

**Figure S101.** 13C NMR (101 MHz, Chloroform*-d*) spectra for compound **37**

**Figure S102.** 1H NMR (400 MHz, Chloroform*-d*) spectra for compound **38**

**Figure S103.** 13C NMR (101 MHz, Chloroform*-d*) spectra for compound **38**

**Figure S104.** 1H NMR (400 MHz, Chloroform*-d*) spectra for compound **39**

**Figure S105.** 13C NMR (101 MHz, Chloroform*-d*) spectra for compound **39**

**Figure S106.** 1H NMR (400 MHz, Chloroform*-d*) spectra for compound **40**

**Figure S107.** 13C NMR (101 MHz, Chloroform*-d*) spectra for compound **40**

**Figure S108.** 1H NMR (400 MHz, D2O) spectra for compound **41**

**Figure S109.** 13C NMR (101 MHz, D2O) spectra for compound **41**

**Figure S110.** 1H NMR (400 MHz, Chloroform*-d*) spectra for compound **42**

**Figure S111.** 13C NMR (101 MHz, Chloroform*-d*) spectra for compound **42**

**Figure S112.** 1H NMR (400 MHz, Chloroform*-d*) spectra for compound **43**

**Figure S113.** 13C NMR (101 MHz, Chloroform*-d*) spectra for compound **43**

**Figure S114.** 1H NMR (400 MHz, Chloroform*-d*) spectra for compound **44**

**Figure S115.** 13C NMR (101 MHz, Chloroform*-d*) spectra for compound **44**

**Figure S116.** 1H NMR (400 MHz, Chloroform*-d*) spectra for compound **45**

**Figure S117.** 13C NMR (101 MHz, Chloroform*-d*) spectra for compound **45**

**Figure S118.** 1H NMR (400 MHz, Chloroform*-d*) spectra for compound **46**

**Figure S119.** 13C NMR (101 MHz, Chloroform*-d*) spectra for compound **46**

**Figure S120.** 1H NMR (400 MHz, Chloroform*-d*) spectra for compound **47**

**Figure S121.** 13C NMR (101 MHz, Chloroform*-d*) spectra for compound **47**


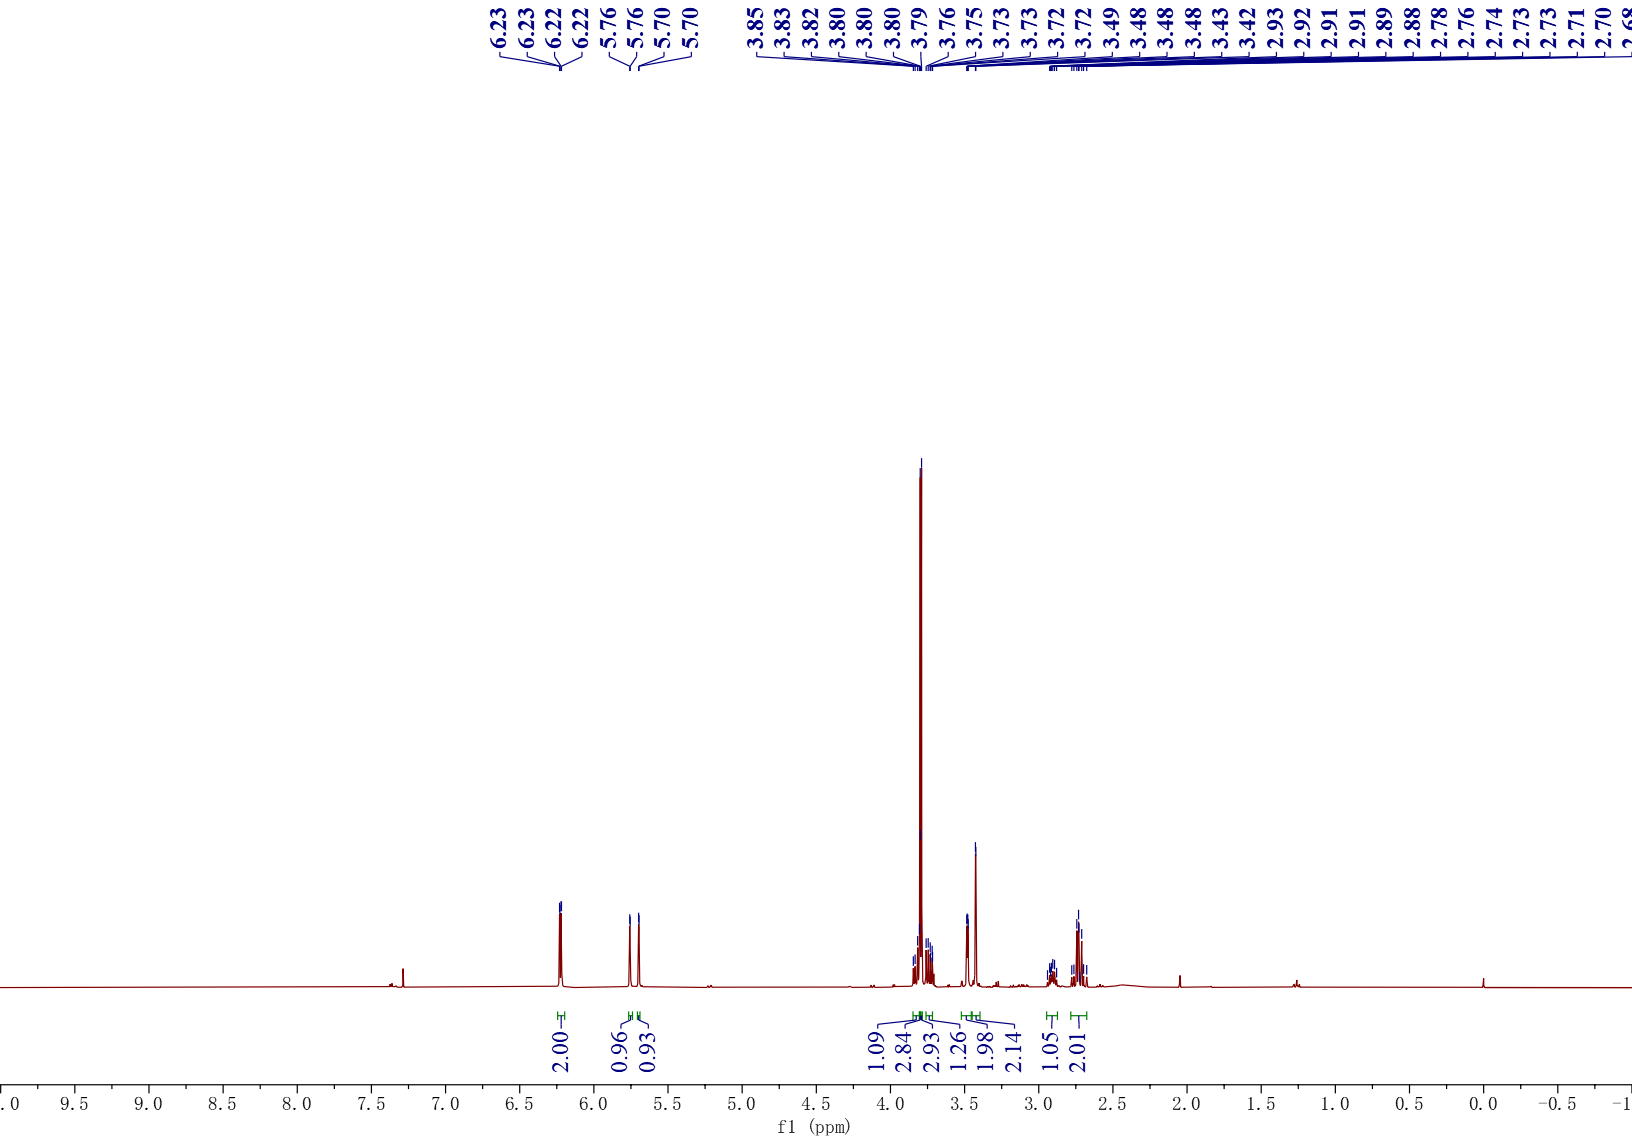


**Figure S122.** 1H NMR (400 MHz, Chloroform*-d*) spectra for compound **48**


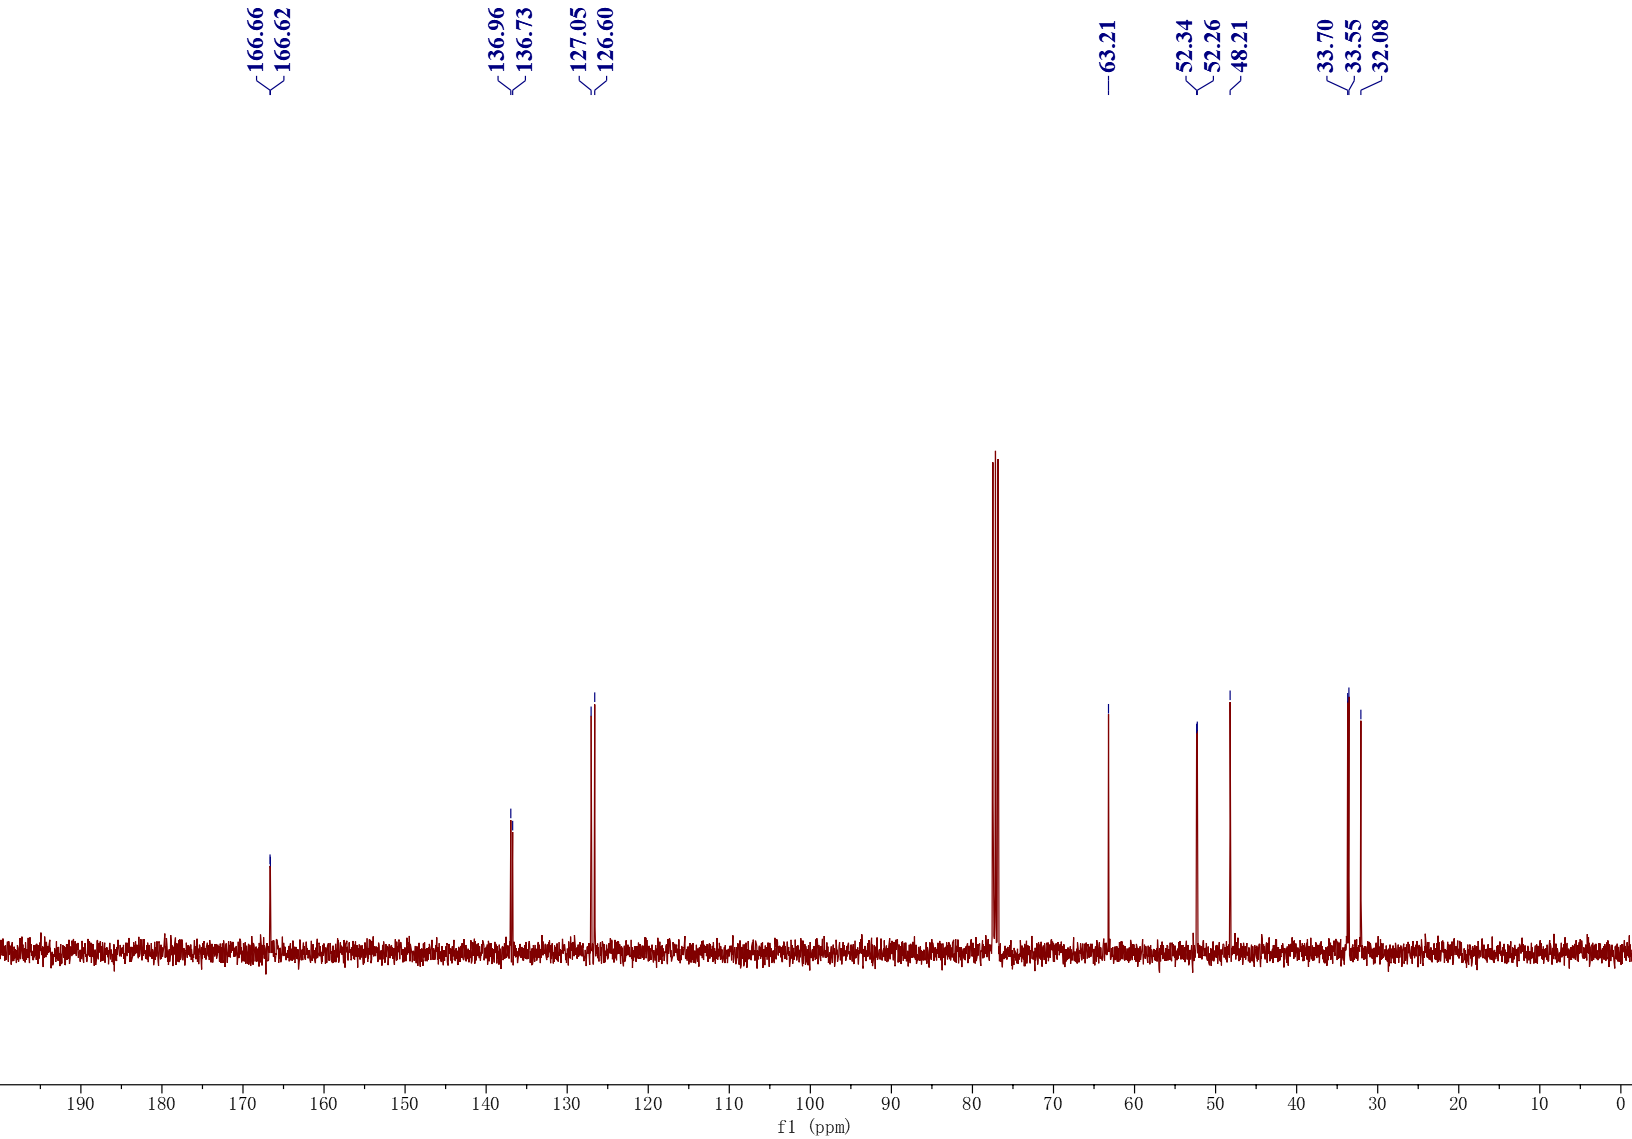


**Figure S123.** 13C NMR (101 MHz, Chloroform*-d*) spectra for compound **48**

**Figure S124.** 1H NMR (400 MHz, Chloroform*-d*) spectra for compound **49**

**Figure S125.** 13C NMR (101 MHz, Chloroform*-d*) spectra for compound **49**

**Figure S126.** 1H NMR (400 MHz, Chloroform*-d*) spectra for compound **50**

**Figure S127.** 13C NMR (101 MHz, Chloroform*-d*) spectra for compound **50**

**Figure S128.** 1H NMR (400 MHz, Chloroform*-d*) spectra for compound **51**

**Figure S129.** 13C NMR (101 MHz, Chloroform*-d*) spectra for compound **51**

**Figure S130.** 1H NMR (400 MHz, Chloroform*-d*) spectra for compound **52**

**Figure S131.** 13C NMR (101 MHz, Chloroform*-d*) spectra for compound **52**

**Figure S132.** 1H NMR (400 MHz, Chloroform*-d*) spectra for compound **53**

**Figure S133.** 13C NMR (101 MHz, Chloroform*-d*) spectra for compound **53**


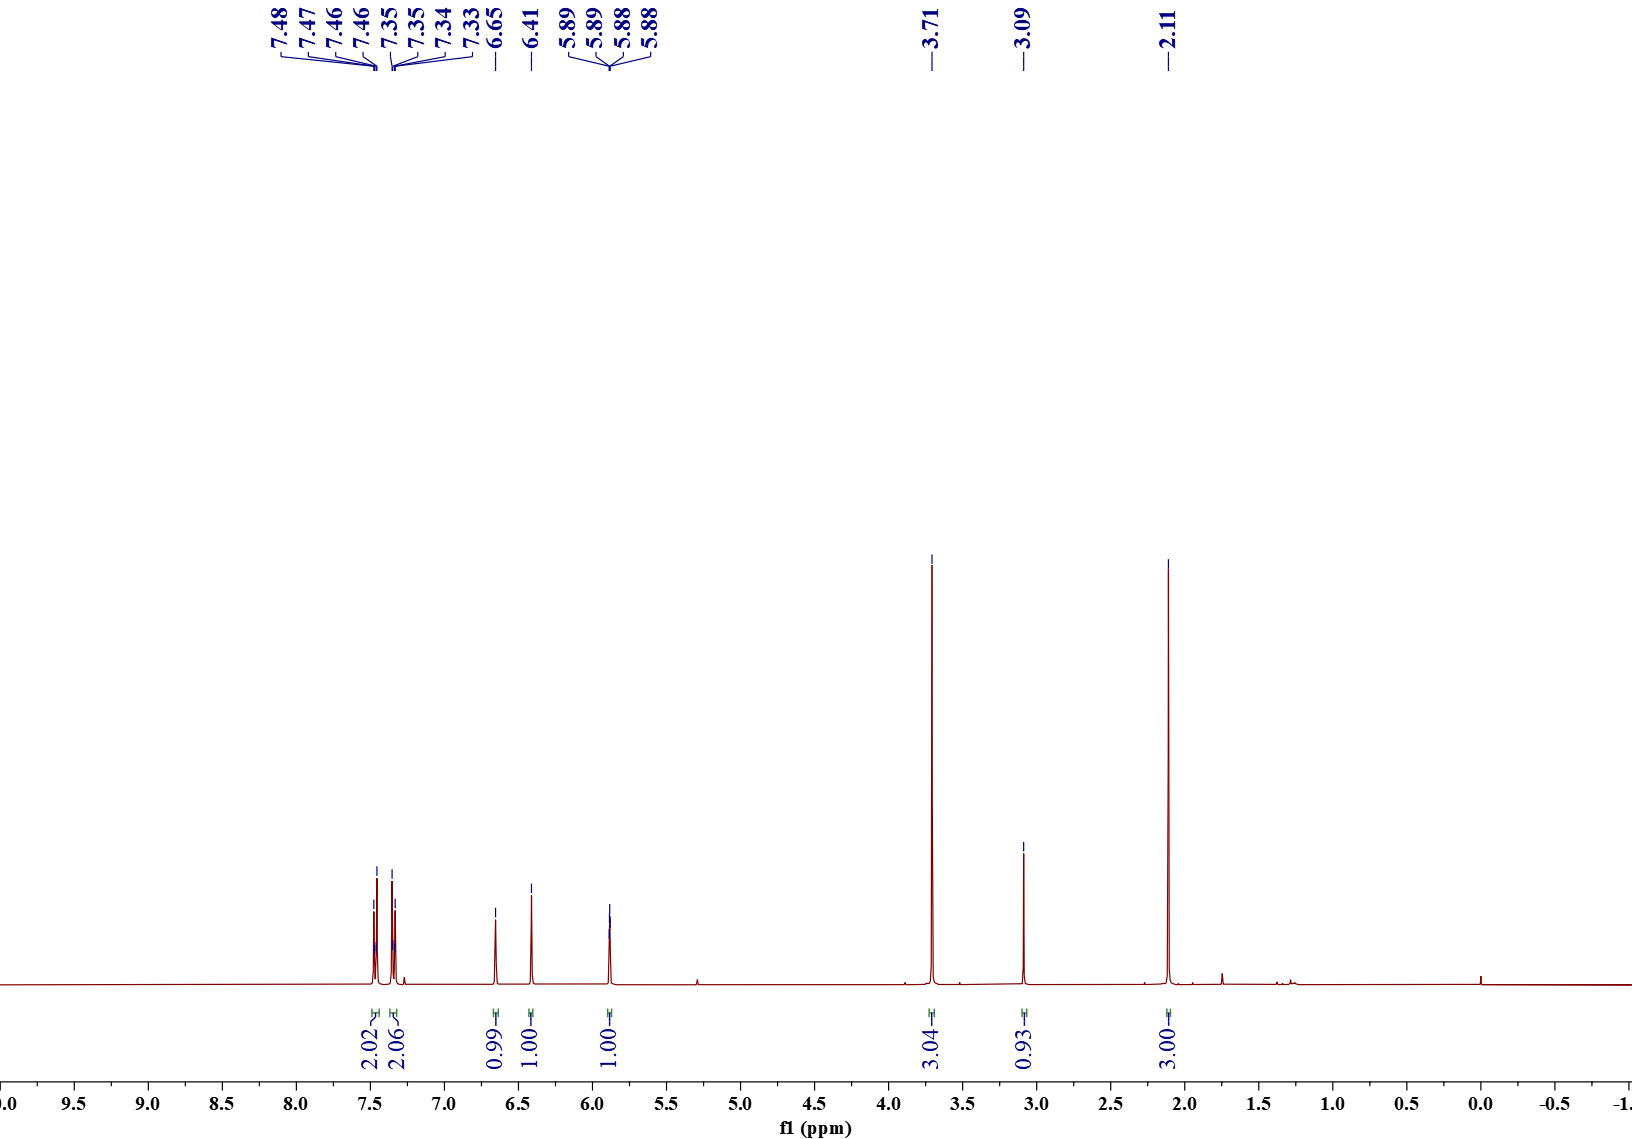


**Figure S134.** 1H NMR (400 MHz, Chloroform*-d*) spectra for compound **54**


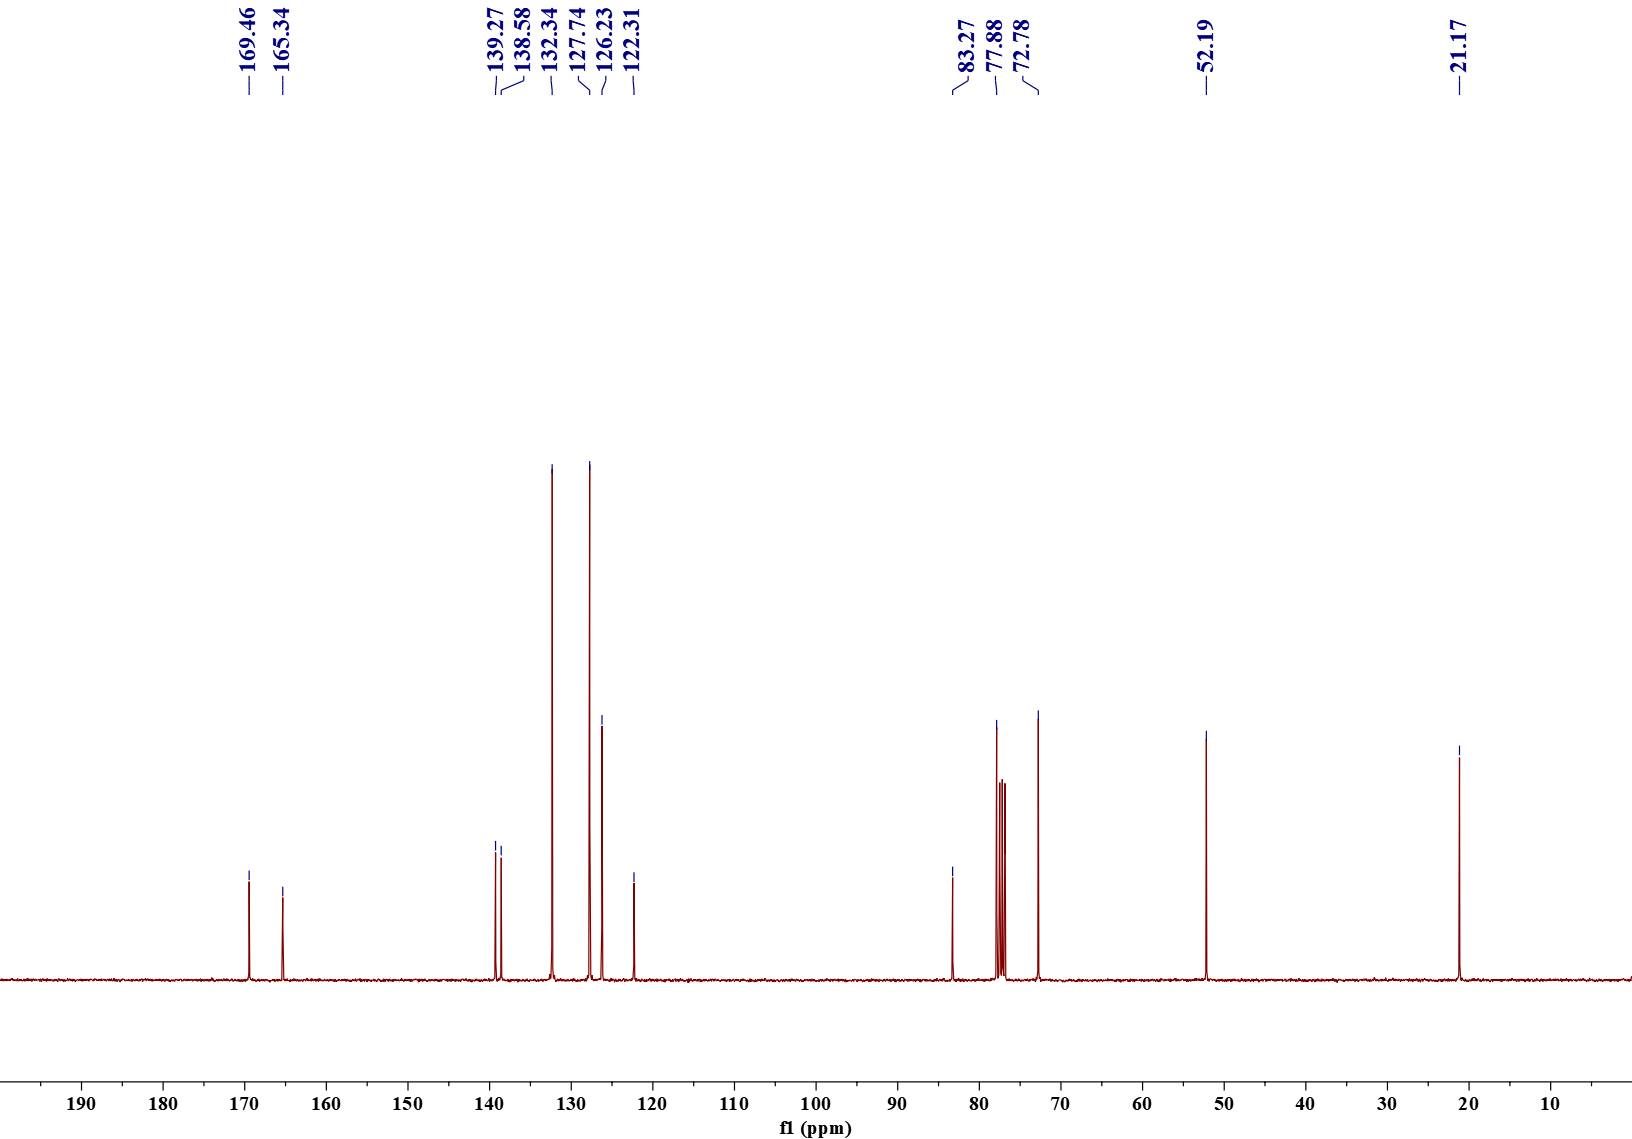


**Figure S135.** 13C NMR (101 MHz, Chloroform*-d*) spectra for compound **54**


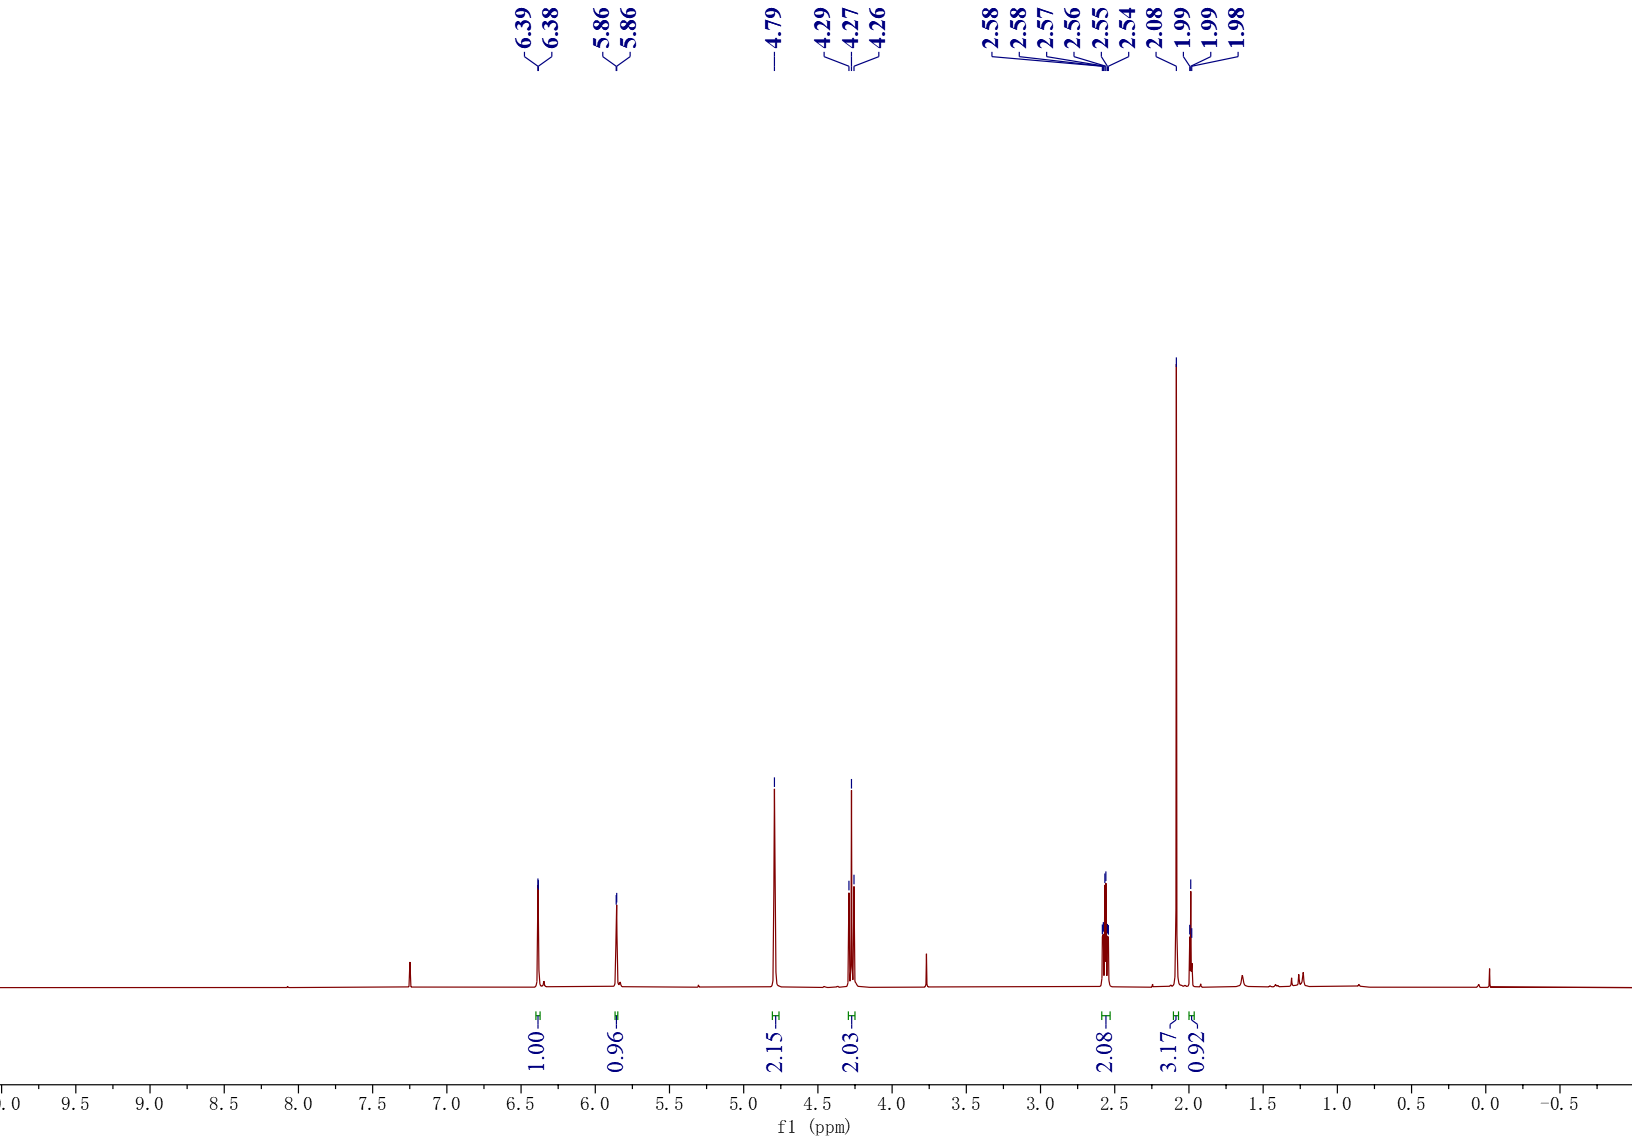


**Figure S136.** 1H NMR (400 MHz, Chloroform*-d*) spectra for compound **55**


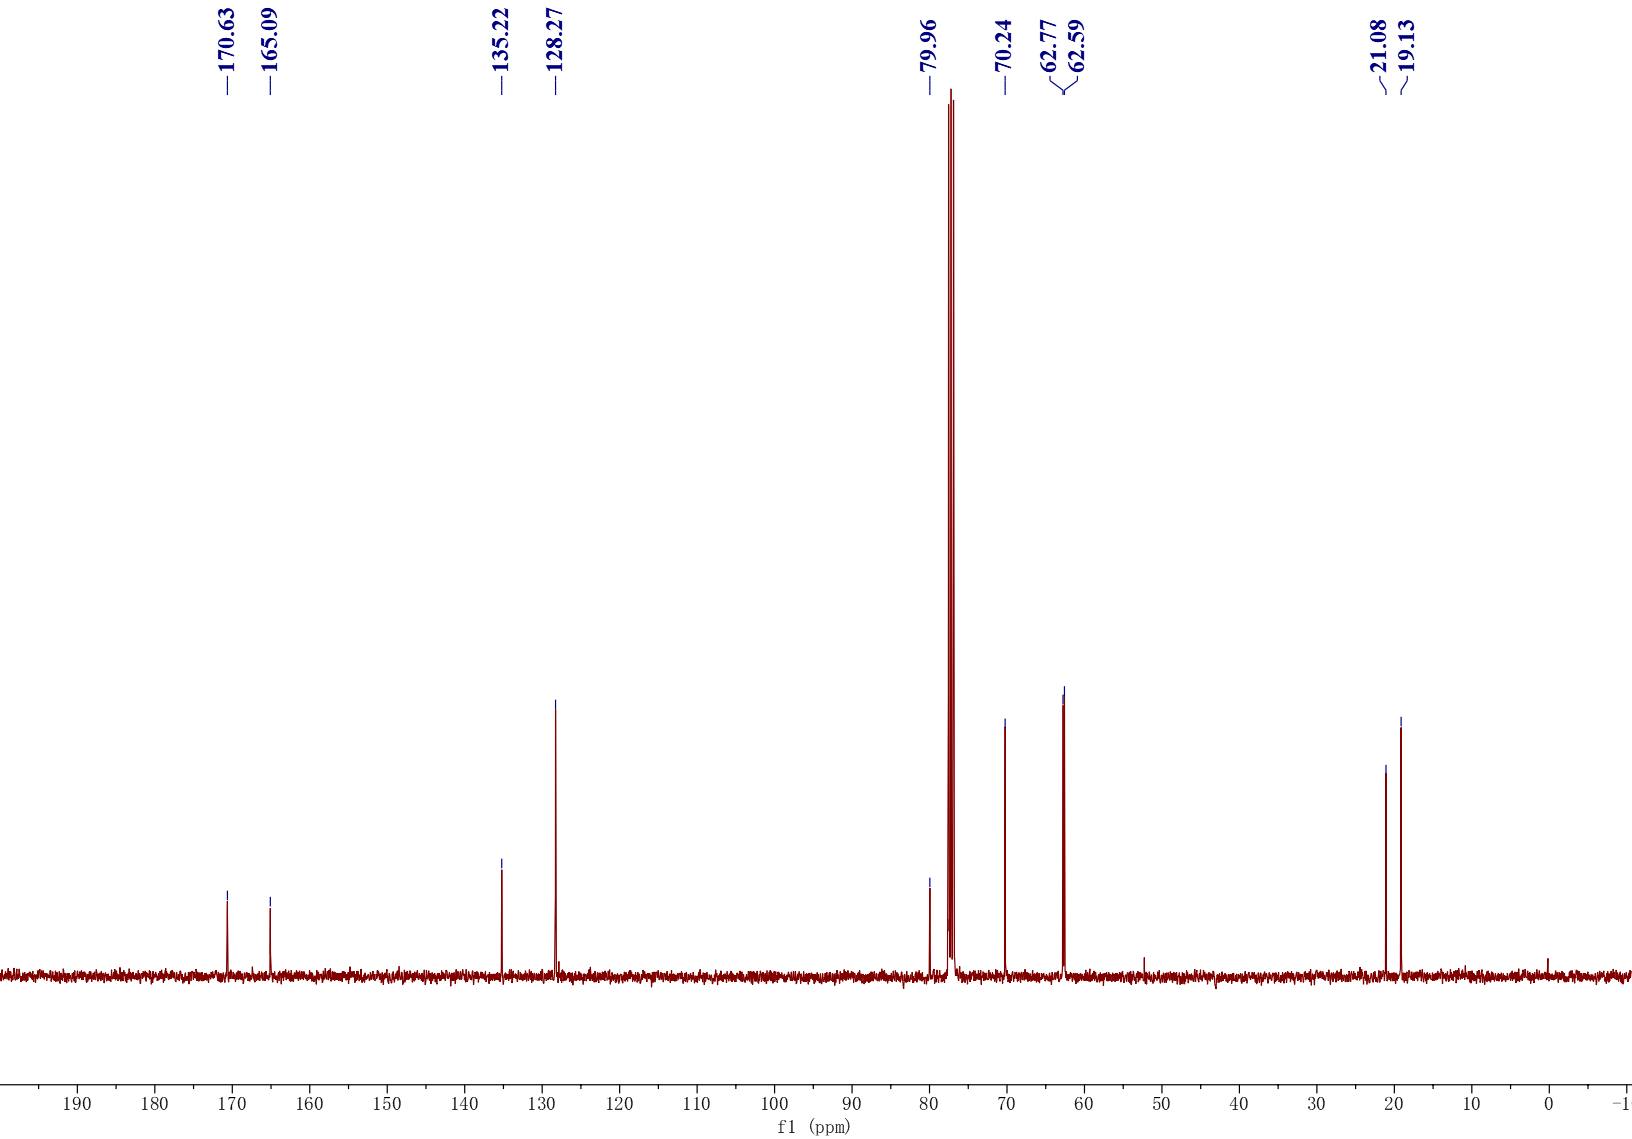


**Figure S137.** 13C NMR (101 MHz, Chloroform*-d*) spectra for compound **55**


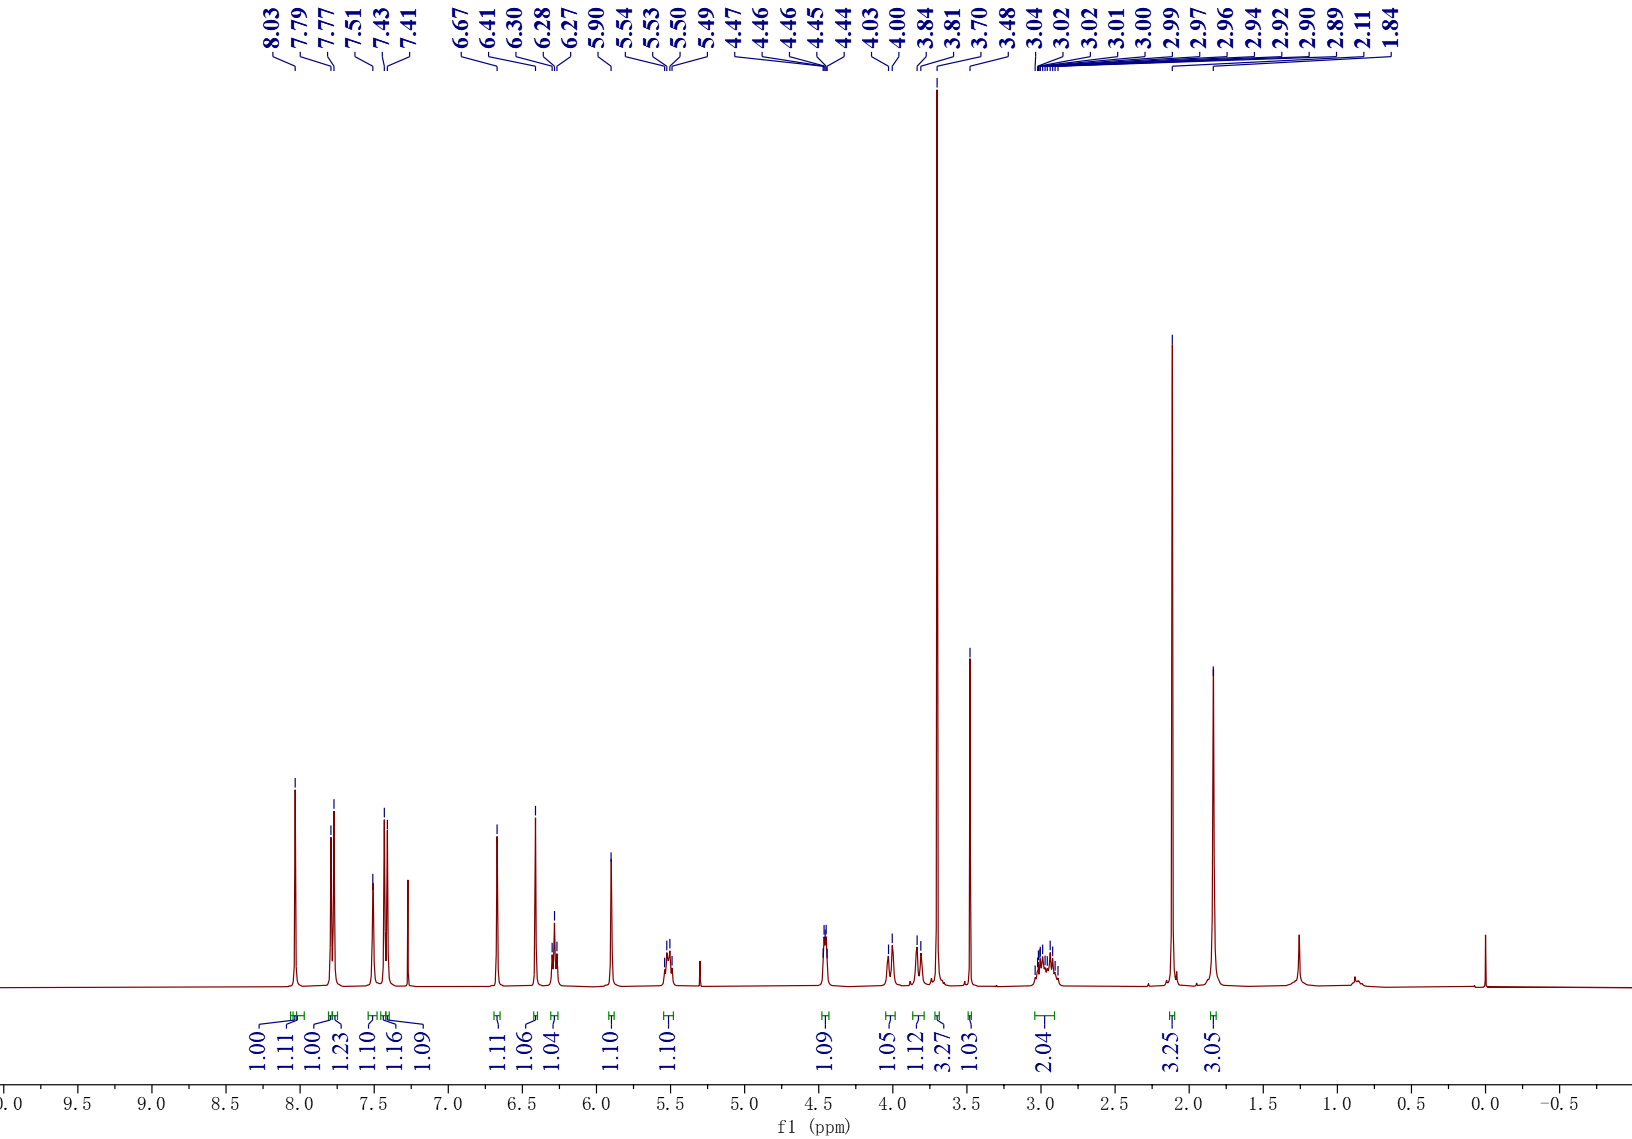


**Figure S138.** 1H NMR (400 MHz, Chloroform*-d*) spectra for compound **56**


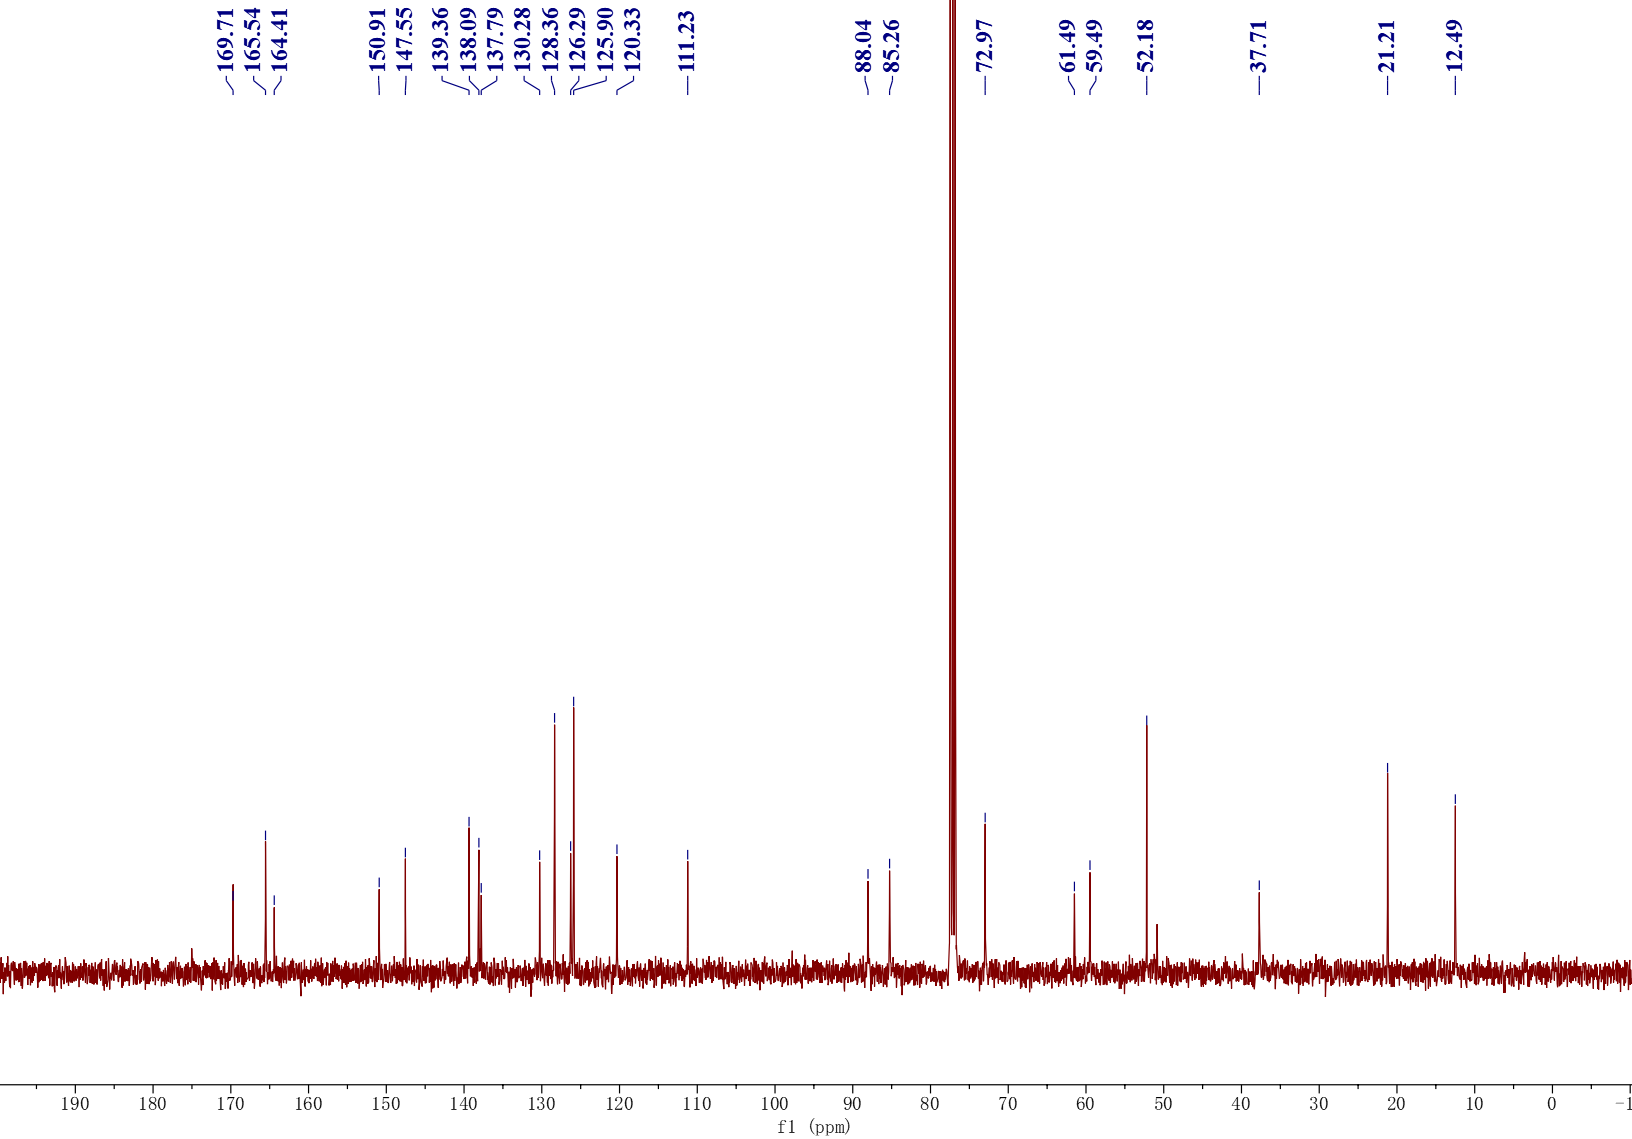


**Figure S139.** 13C NMR (101 MHz, Chloroform*-d*) spectra for compound **56**


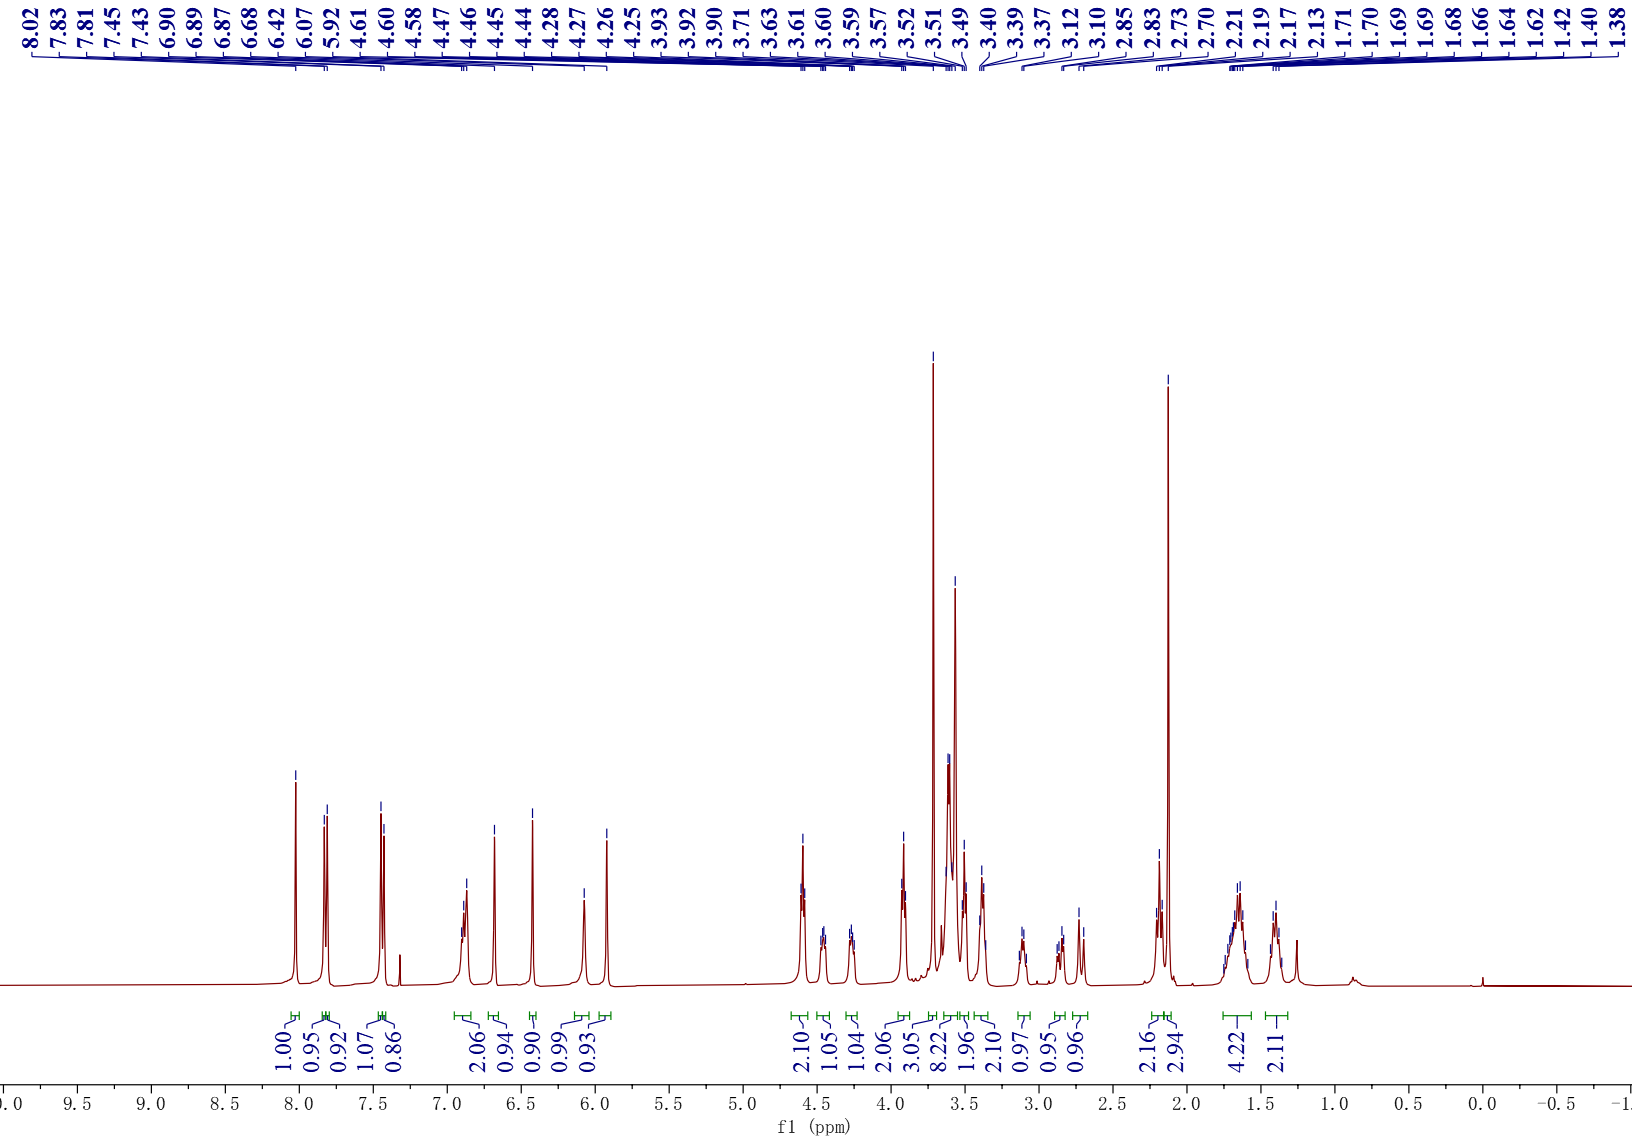


**Figure S140.** 1H NMR (400 MHz, Chloroform*-d*) spectra for compound **57**


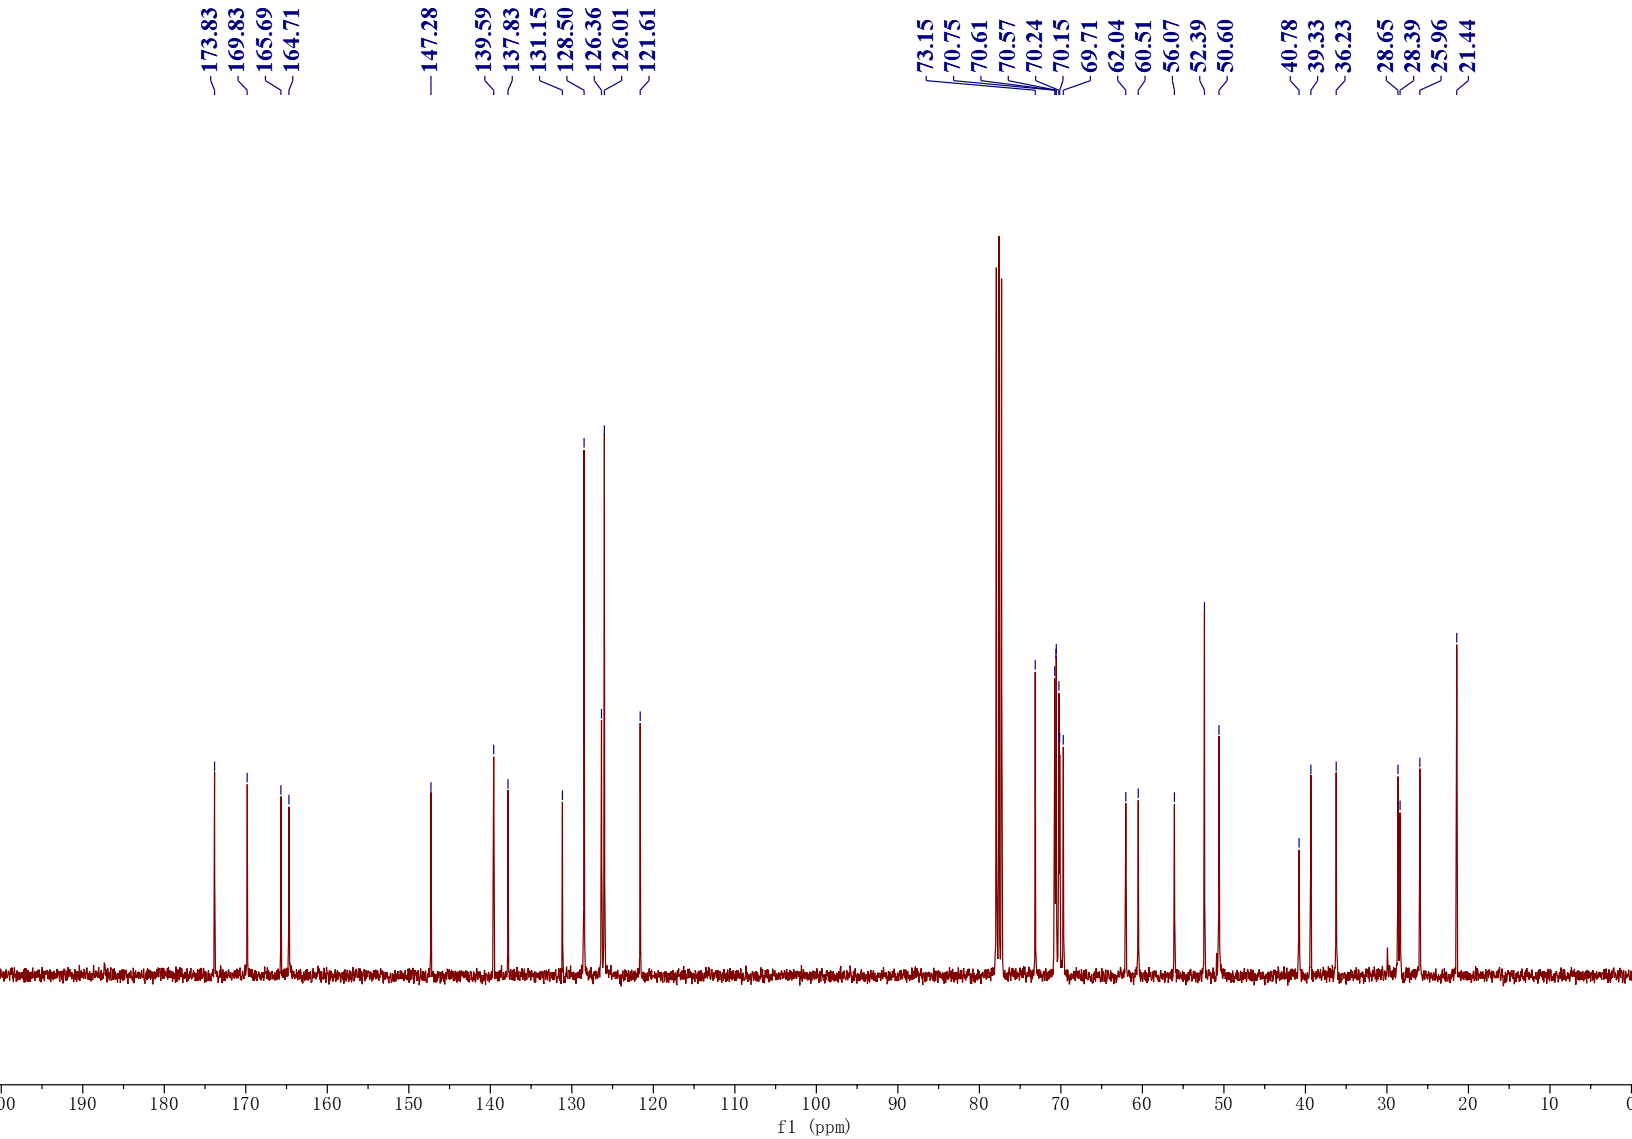


**Figure S141.** 13C NMR (101 MHz, Chloroform*-d*) spectra for compound **57**

**Figure S142.** 1H NMR (400 MHz, Chloroform*-d*) spectra for compound **58**

**Figure S143.** 13C NMR (101 MHz, Chloroform*-d*) spectra for compound **58**

**Figure S144.** 1H NMR (400 MHz, Chloroform*-d*) spectra for compound **59**

**Figure S145.** 13C NMR (101 MHz, Chloroform*-d*) spectra for compound **59**


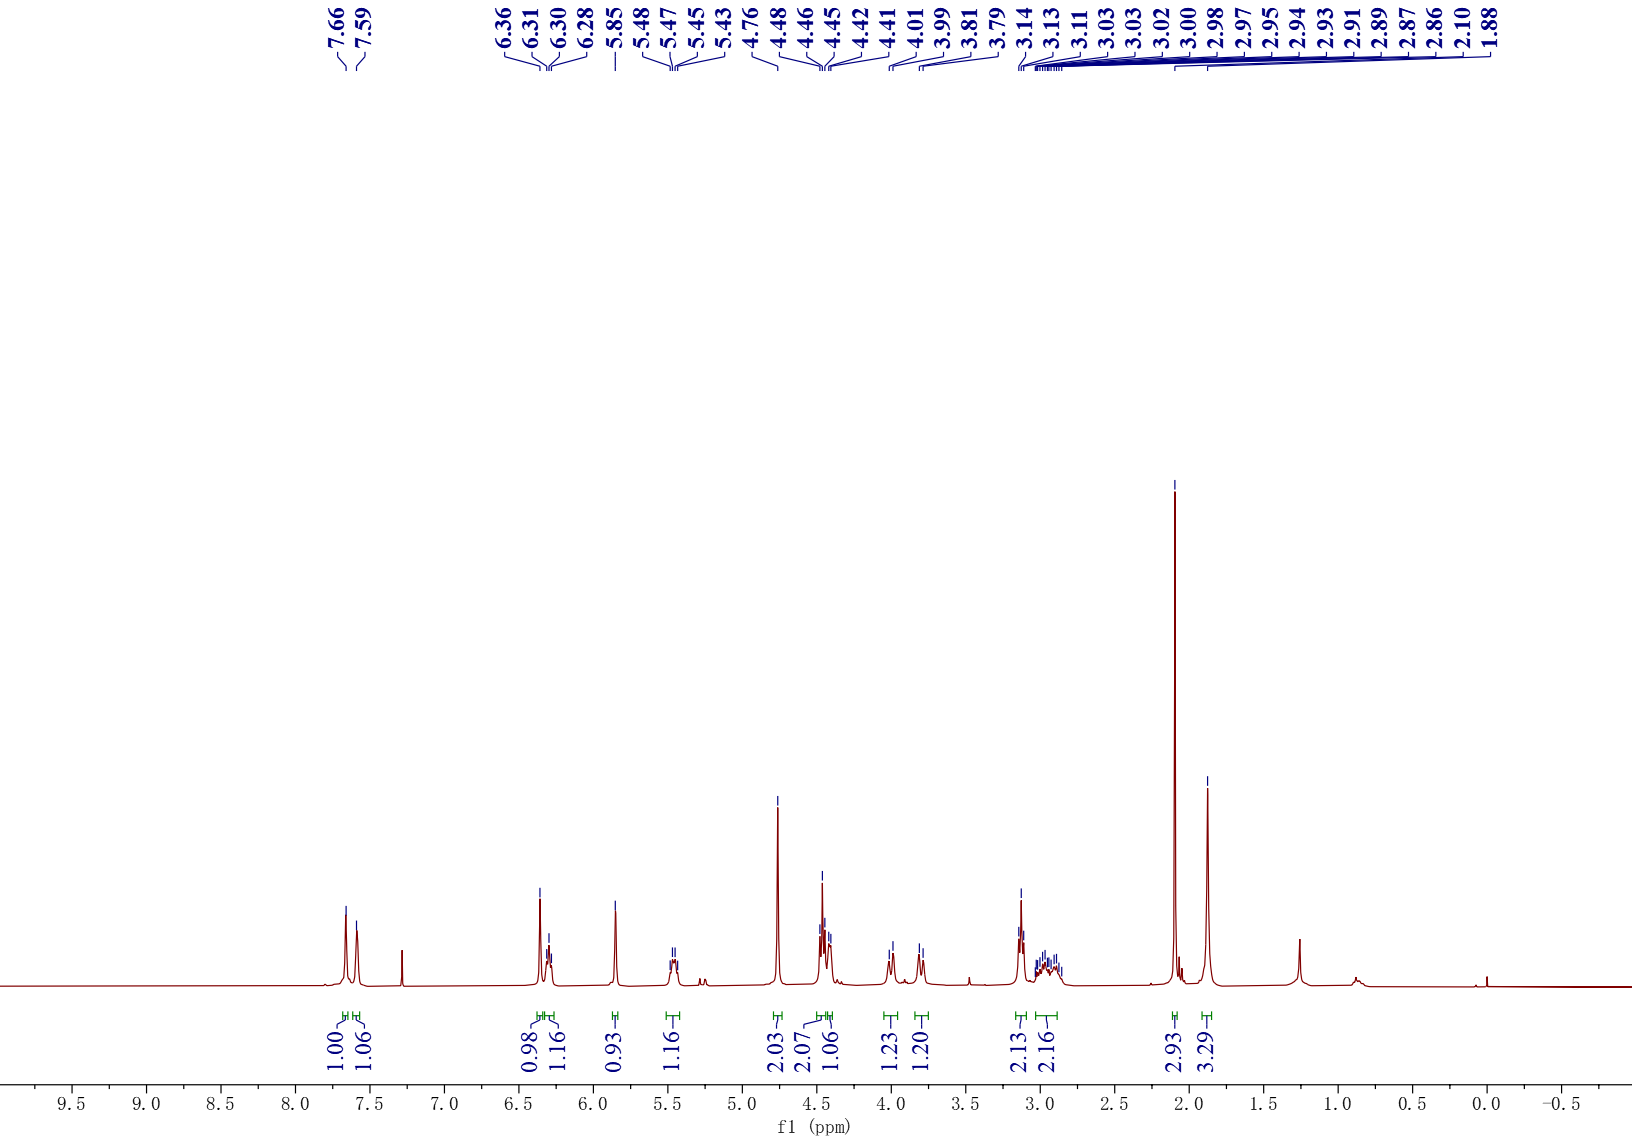


**Figure S146.** 1H NMR (400 MHz, Chloroform*-d*) spectra for compound **60**


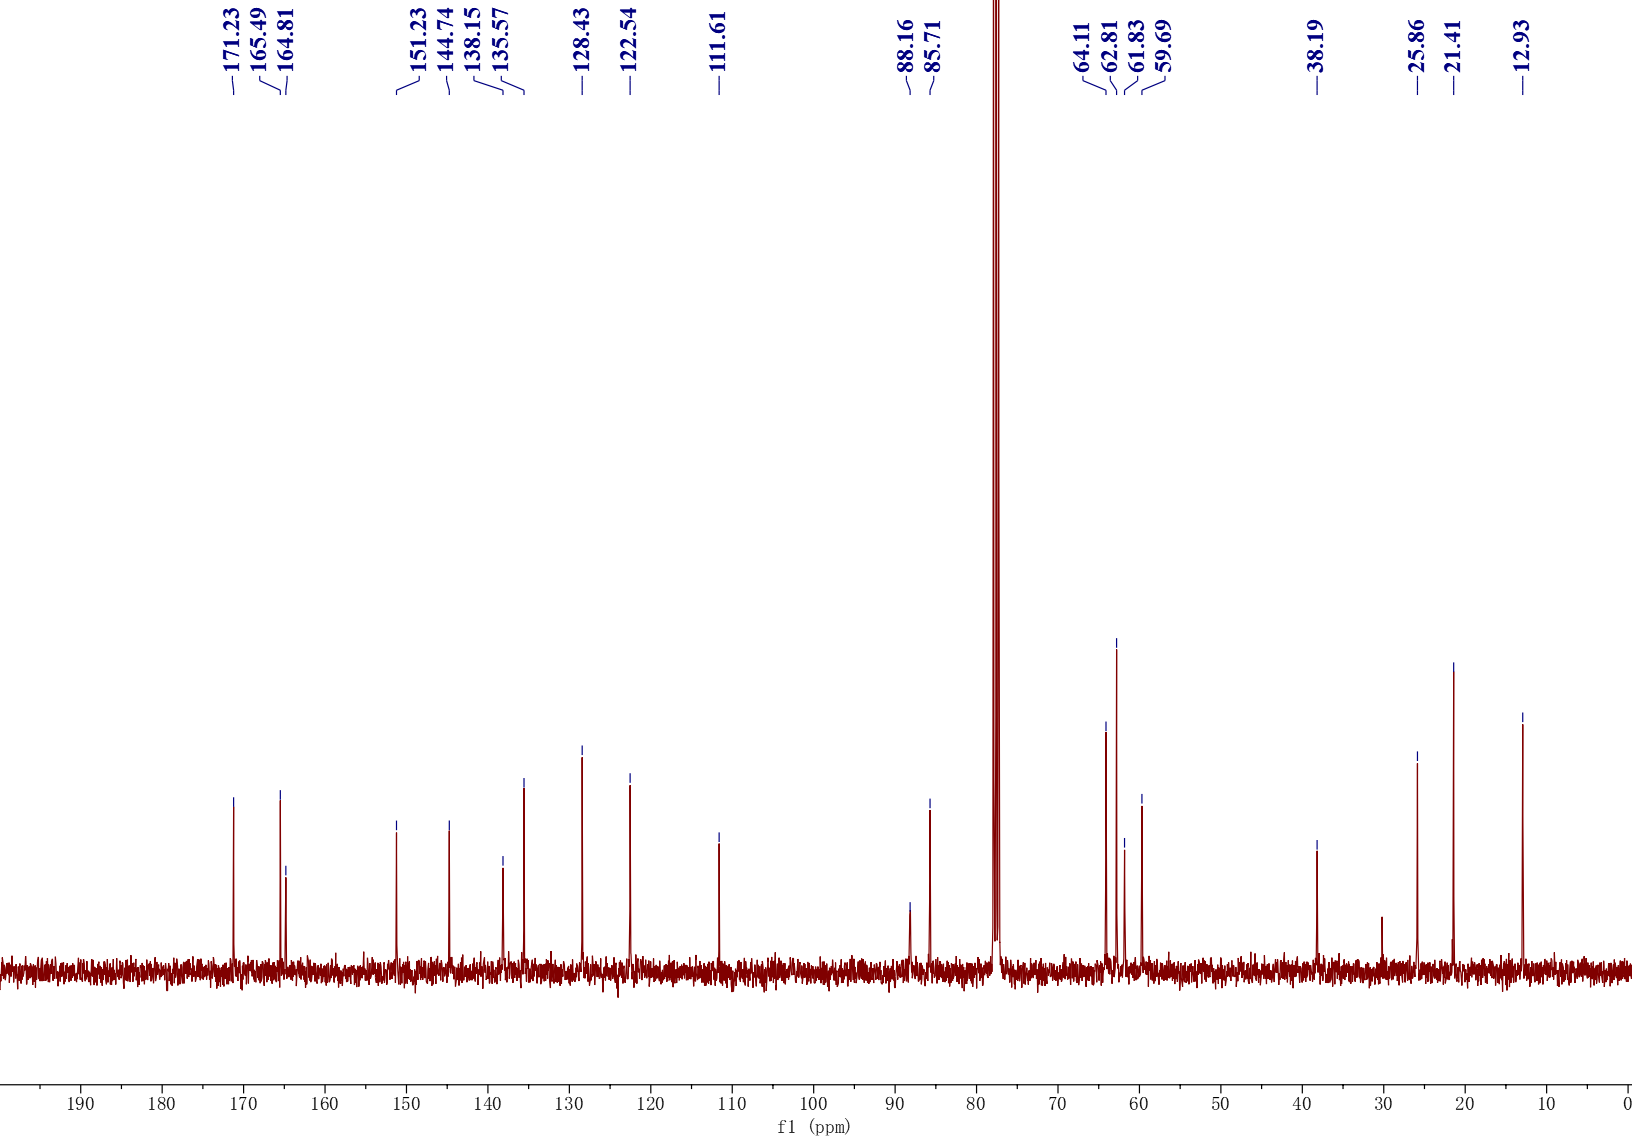


**Figure S147.** 13C NMR (101 MHz, Chloroform*-d*) spectra for compound **60**


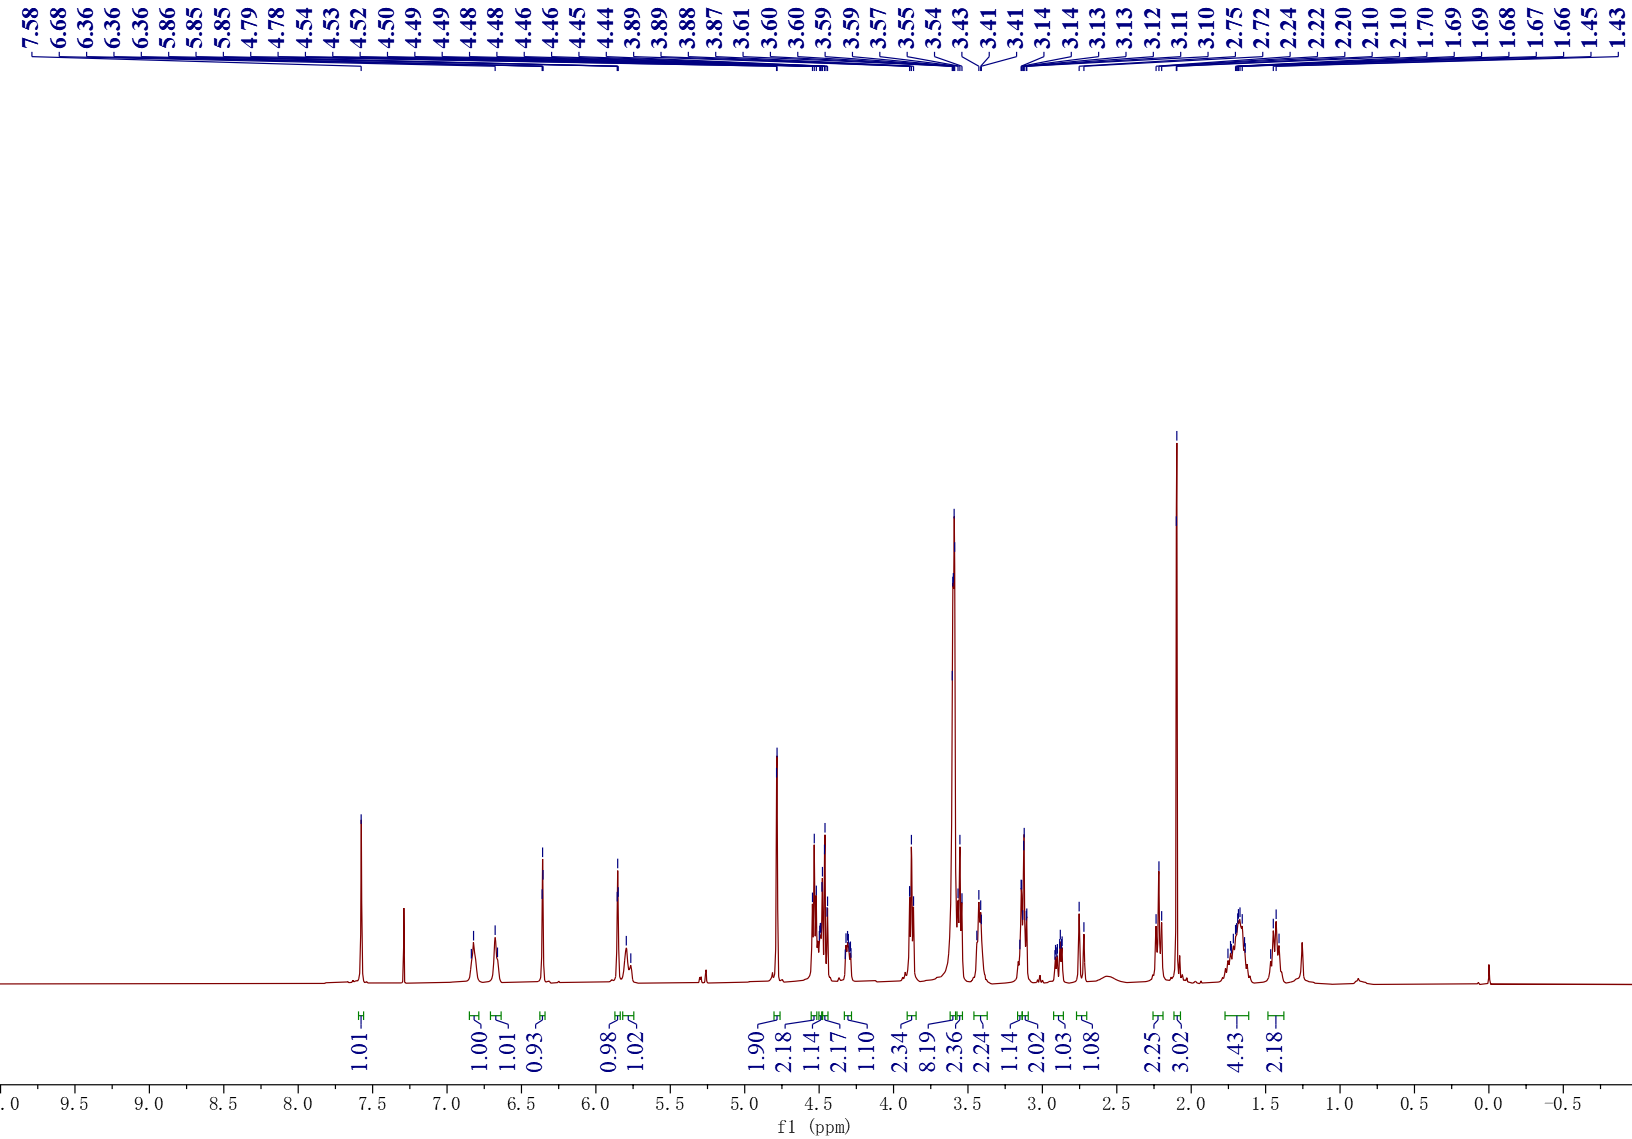


**Figure S148.** 1H NMR (400 MHz, Chloroform*-d*) spectra for compound **61**


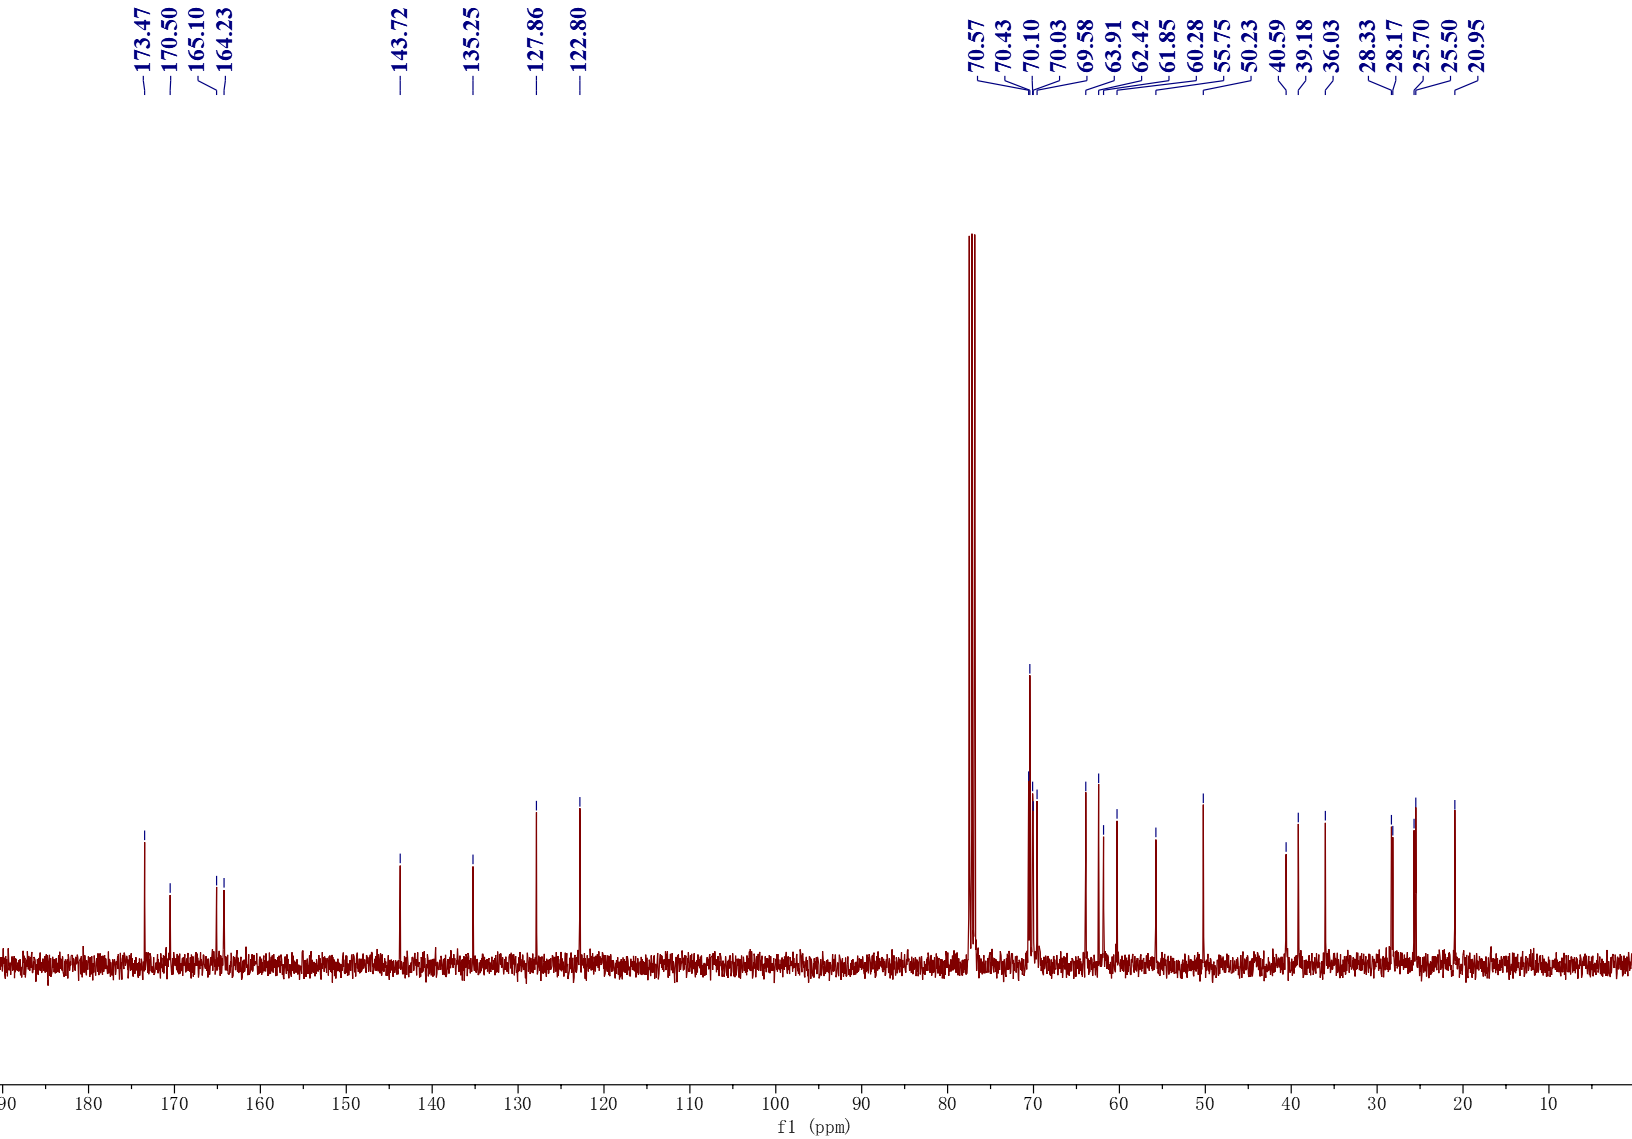


**Figure S149.** 13C NMR (101 MHz, Chloroform*-d*) spectra for compound **61**

**Figure S150.** 1H NMR (400 MHz, Chloroform*-d*) spectra for compound **62**


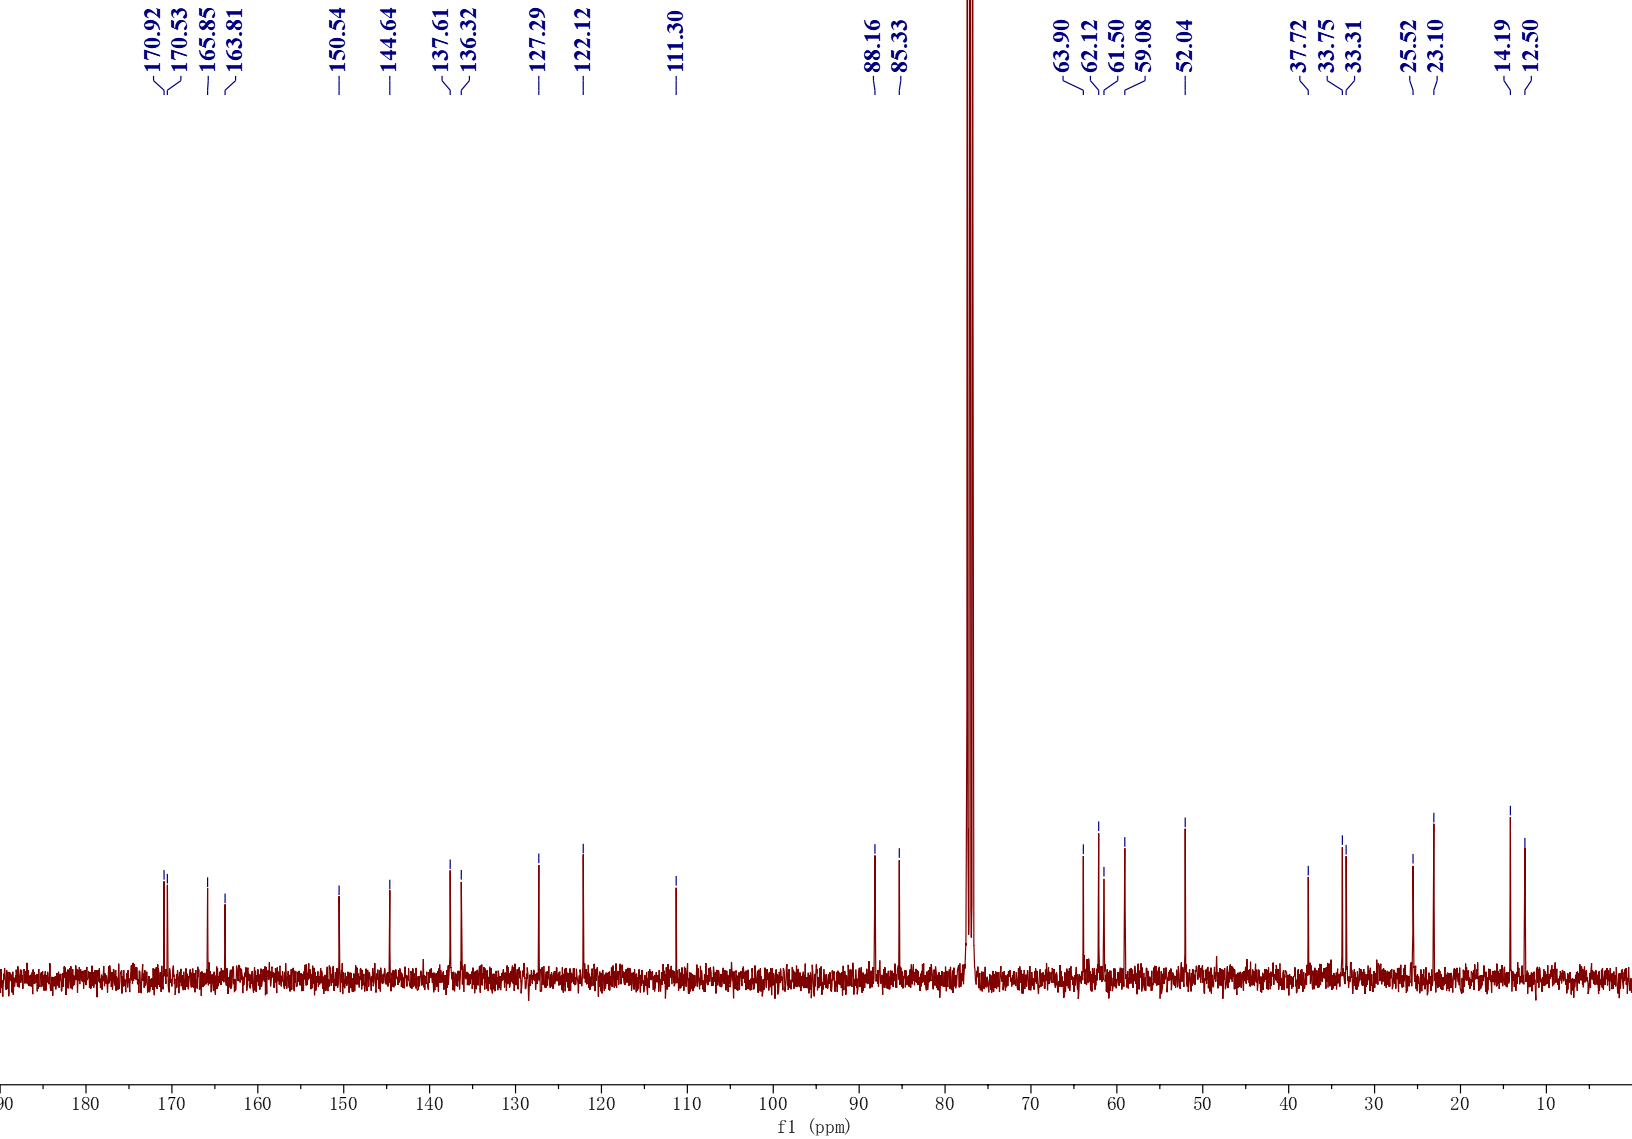


**Figure S151.** 13C NMR (101 MHz, Chloroform*-d*) spectra for compound **62**

**Figure S152.** 1H NMR (400 MHz, Chloroform-*d*) spectra for compound **63**

**Figure S153.** 13C NMR (101 MHz, Chloroform*-d*) spectra for compound **63**


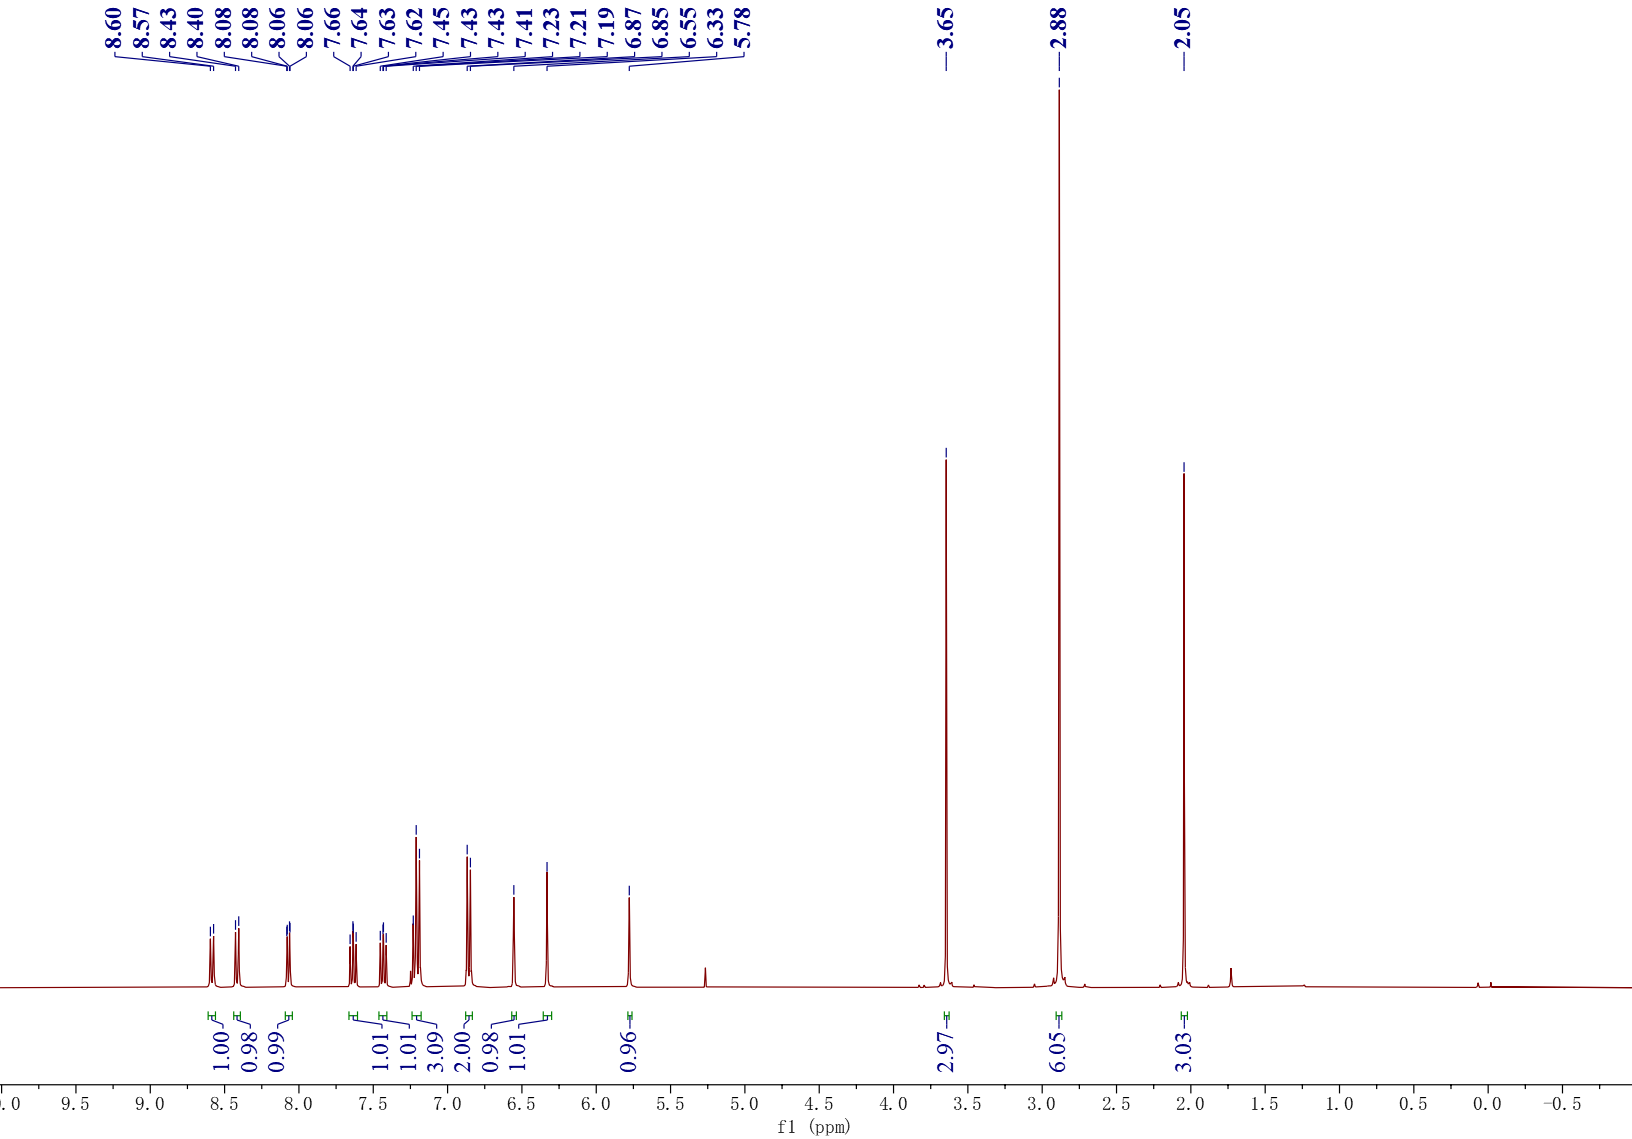


**Figure S154.** 1H NMR (400 MHz, Chloroform-*d*) spectra for compound **64**


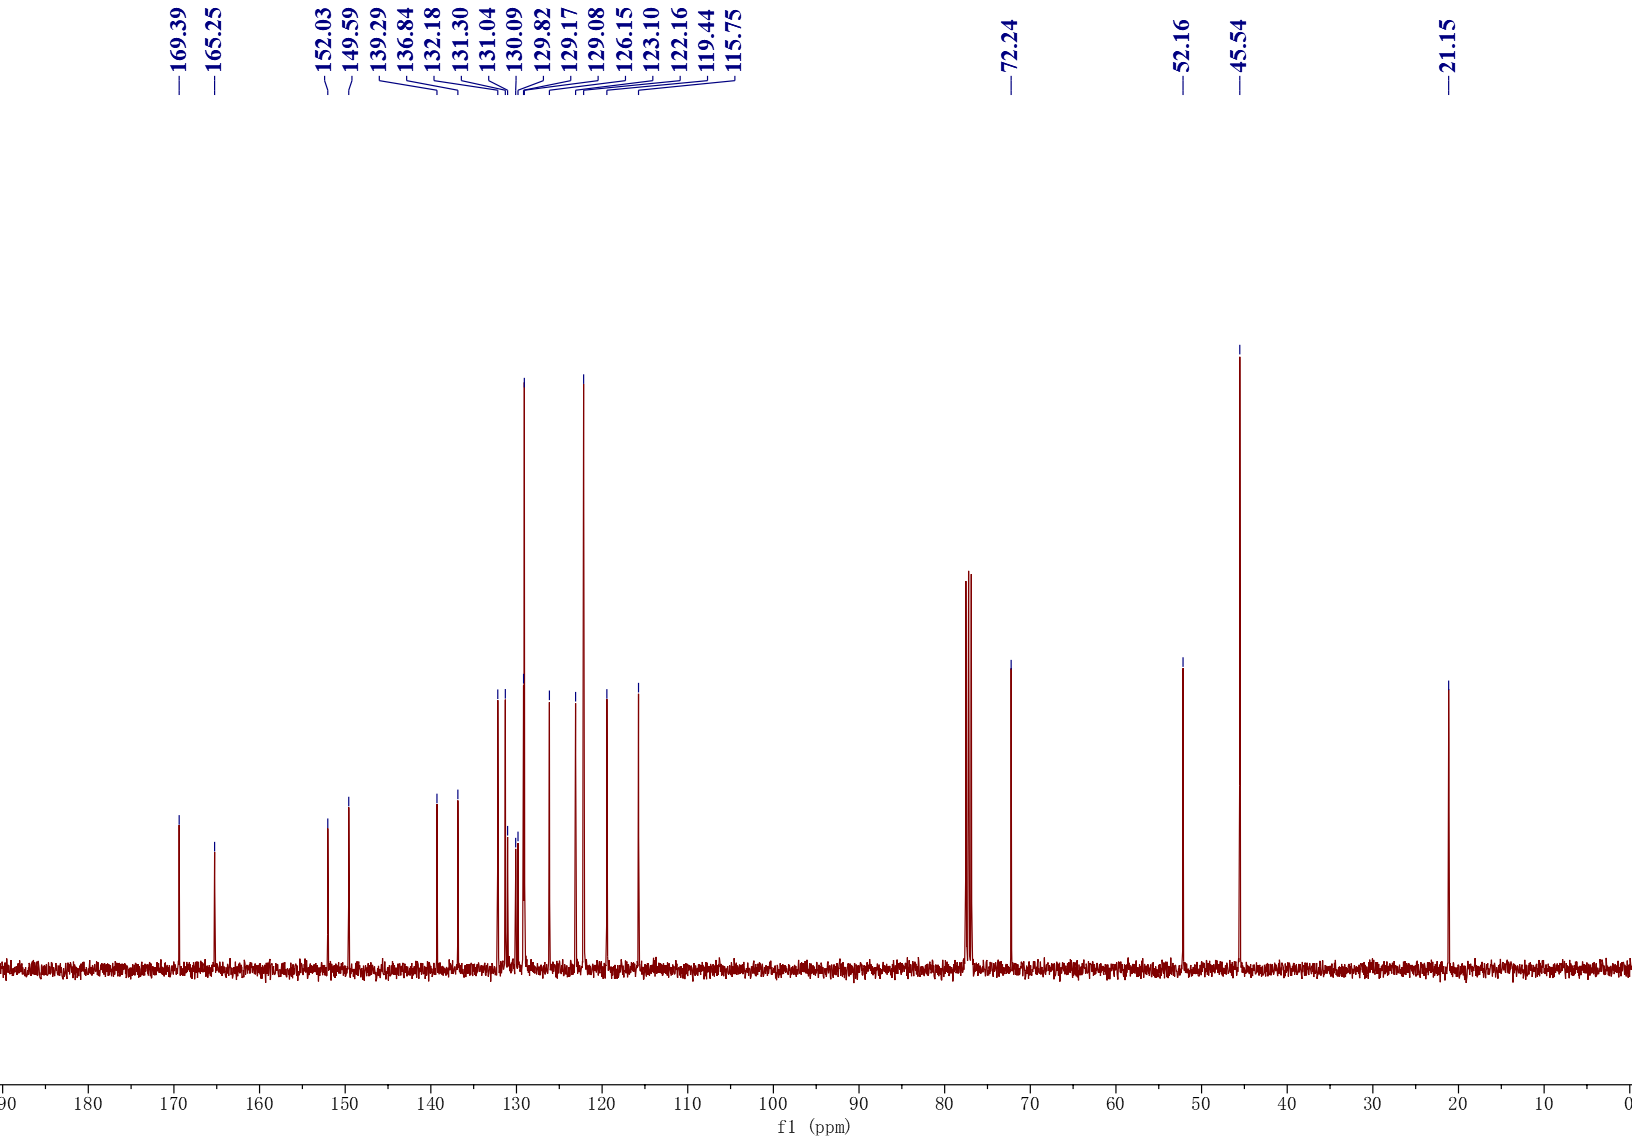


**Figure S155.** 13C NMR (101 MHz, Chloroform*-d*) spectra for compound **64**

**Figure S156.** 1H NMR (400 MHz, Chloroform*-d*) spectra for compound **65**

**Figure S157.** 13C NMR (101 MHz, Chloroform*-d*) spectra for compound **65**


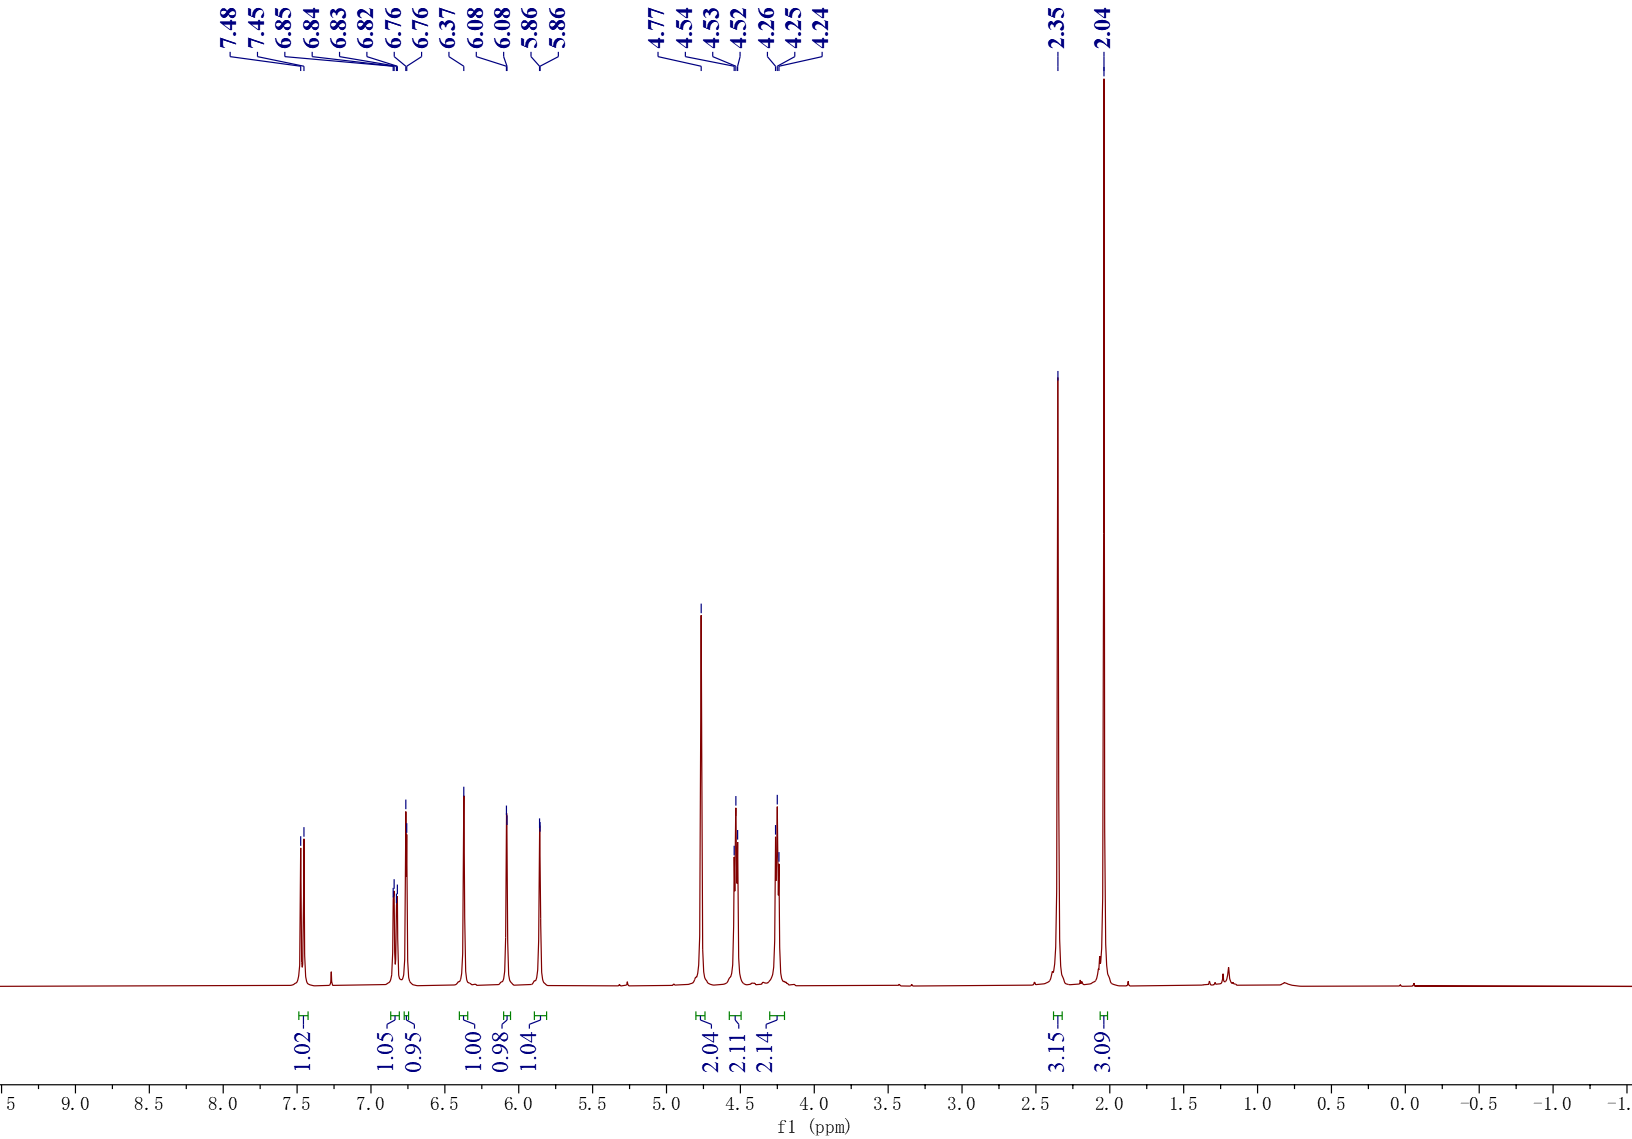


**Figure S158.** 1H NMR (400 MHz, Chloroform-*d*) spectra for compound **66**


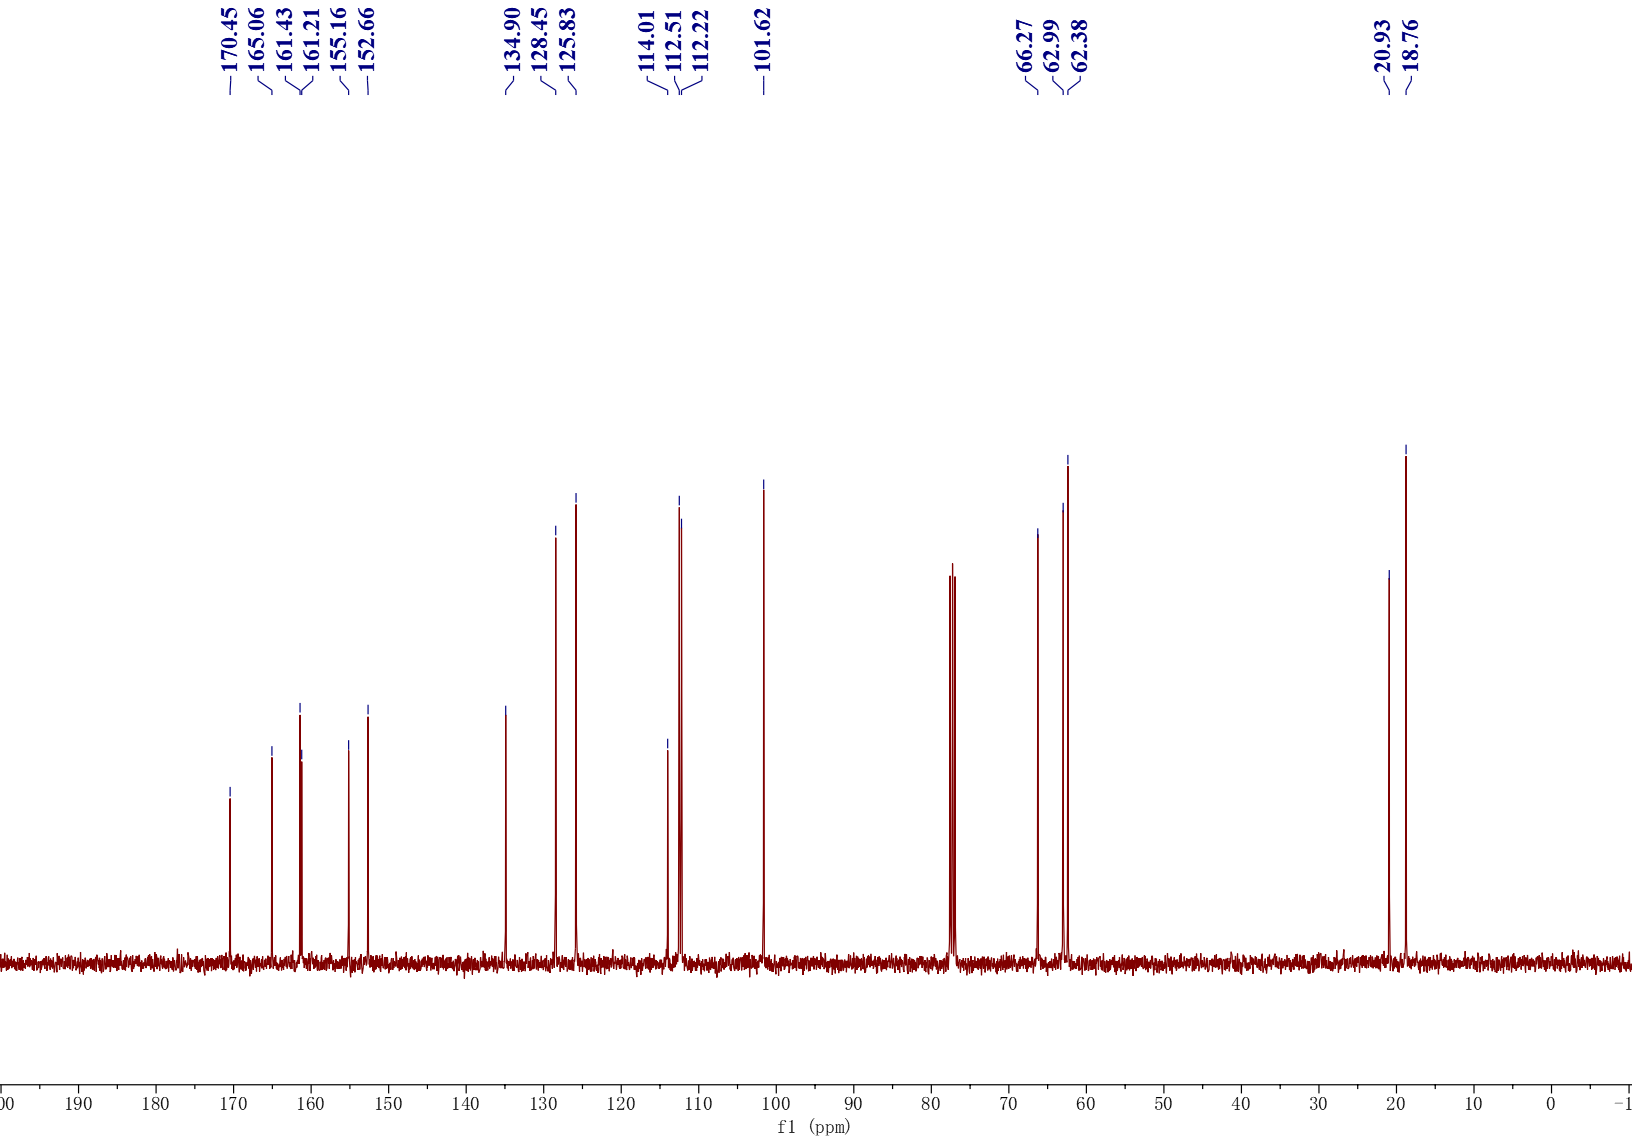


**Figure S159.** 13C NMR (101 MHz, Chloroform*-d*) spectra for compound **66**

**Figure S160.** 1H NMR (400 MHz, Chloroform-*d*) spectra for compound **67**

**Figure S161.** 13C NMR (101 MHz, Chloroform*-d*) spectra for compound **67**
